# Supplementary material for: Cu-catalyzed regioselective borylcyanation of 1,3-dienes
Source: Royal Society of Chemistry journal article supplement (doi:10.1039/c8cc07032f), 2018-01-01

## SUPPORTING INFORMATION

### Cu-Catalyzed Regioselective Borylcyanation of 1,3-Dienes

*Lu Wen,* <sup>[a]</sup> *Haiyan Zhang,* <sup>[a]</sup> *Jiping Wang,* <sup>[a]</sup> *Fanke Meng*<sup>\*[a]</sup>

<sup>[a]</sup>State Key Laboratory of Organometallic Chemistry, Shanghai Institute of Organic Chemistry, Chinese Academy of Sciences, 345 Lingling Road, Shanghai, China, 200032

**Corresponding Author**

[\\*mengf@sioc.ac.cn](mailto:*mengf@sioc.ac.cn)

## Table of Contents

|                                                                                                        |         |
|--------------------------------------------------------------------------------------------------------|---------|
| General.....                                                                                           | S2      |
| Reagents and Ligands .....                                                                             | S2-S3   |
| General Experimental Procedure for Cu-Catalyzed Regioselective Borylcyanation of 1,3-dienes.....       | S3-S4   |
| Characterization of product.....                                                                       | S4-S17  |
| Representative Experimental Procedure for Reduction of CN to Aldehyde.....                             | S17     |
| Representative Experimental Procedure for Reduction of the Nitrile Moiety to the Protected Amines..... | S17     |
| Representative Experimental Procedure for Functionalization of C-B(pin) bond to C-furan.....           | S17     |
| Representative Experimental Procedure for Functionalization of C-B(pin) bond to C-vinyl.....           | S18     |
| Reference.....                                                                                         | S20     |
| NMR Spectra.....                                                                                       | S21-S87 |

■ **General.** Infrared (IR) spectra were recorded on a BRUKER TENSOR 27 FT-IR spectrometer,  $\nu_{\max}$  in  $\text{cm}^{-1}$ . Bands are characterized as broad (br), strong (s), medium (m), and weak (w).  $^1\text{H}$  NMR spectra were recorded on an Agilent 400 MHz spectrometers. Chemical shifts are reported in ppm from tetramethylsilane with the solvent resonance as the internal standard ( $\text{CDCl}_3$ :  $\delta$  7.26 ppm). Data are reported as follows: chemical shift, integration, multiplicity (s = singlet, d = doublet, t = triplet, q = quartet, m = multiplet), and coupling constant (Hz).  $^{13}\text{C}$  NMR spectra were recorded on an Agilent 100 MHz spectrometers with complete proton decoupling. Chemical shifts are reported in ppm from tetramethylsilane with the solvent resonance as the internal standard ( $\text{CDCl}_3$ :  $\delta$  77.00 pm). EI-HRMS and ESI-HRMS spectra were obtained on a Waters Micromass G1540N/GCT Premier and a Thermo Fisher Scientific LTQ FT Ultra, respectively. Unless otherwise noted, all reactions were carried out with distilled and degassed solvents under an atmosphere of dry  $\text{N}_2$  in oven- (135 °C) or flame-dried glassware with standard dry box or vacuum-line techniques. Anhydrous tetrahydrofuran (Energy Chemical Co.Ltd.) were used without further purification. All work-up and purification procedures were carried out with reagent grade solvents (purchased from Fisher Scientific) in air.

### ■ Reagents and Ligands:

**Copper chloride:** purchased from Strem Chemicals Inc. and used as received.

**Ligand (4a-4h):** purchased from Tokyo Chemical Industry Co., Ltd. or Sino compound Co., Ltd. and used as received.

**Lithium tert-butoxide:** purchased from Tokyo Chemical Industry Co., Ltd. and used as received.

**Bis(pinacolato)diboron:** purchased from Dalian AllyChem Co.Ltd. and purified by recrystallization in *n*-pentane.

**4A molecular sieve:** purchased from Energy Chemical Co.Ltd. and dried over by oven.

**Tetrahydrofuran and Dichloromethane:** purchased from Adamas Reagent, Ltd. and used as received.

**Sodium perborate tetrahydrate:** purchased from Energy Chemical Co.Ltd. and used as received.

**1-Substituted 1,3-dienes:** prepared according to a previous reported procedure.<sup>1,2</sup>

**2-Substituted 1,3-dienes:** prepared according to a previous reported procedure.<sup>3</sup>

**1,2-Disubstituted 1,3-dienes:** prepared according to a previous reported procedure.<sup>4</sup>

**1,3-Disubstituted 1,3-dienes:** prepared according to a previous reported procedure.<sup>5</sup>

**1,1-Disubstituted 1,3-dienes:** prepared with the Wittig reaction between acetophenone and allyl phosphorus ylide.

**NCTS:** prepared according to a previous reported procedure.<sup>6</sup>

**Diisobutylaluminium hydride:** purchased from Adamas Reagent, Ltd. and used as received.

**Nickel(II) chloride hexahydrate:** purchased from Tokyo Chemical Industry Co., Ltd. and used as received.

**Sodium borohydride:** purchased from Energy Chemical Co.Ltd. and used as received.

**Di-tert-butyl decarbonate:** purchased from Energy Chemical Co.Ltd. and used as received.

**Methanol:** purchased from Adamas Reagent, Ltd. and used as received.

**Furan:** purchased from Tokyo Chemical Industry Co., Ltd. and distilled by CaH<sub>2</sub>.

**N-Bromosuccinimide:** purchased from Tokyo Chemical Industry Co., Ltd. and purified by recrystallization in water.

**Vinylmagnesium bromide:** purchased from Energy Chemical Co.Ltd. and used as received.

## ■ General Experimental Procedure for Cu-Catalyzed Regioselective Borylcyanation of 1,3-dienes.

In a N<sub>2</sub>-filled glove-box, an oven-dried vial (8 mL, 61 × 16.6 mm) with a magnetic stir bar was charged with phosphine ligand **4h** (5.8 mg, 0.01 mmol, 5 mol %), CuCl (1.0 mg, 0.01 mmol, 5 mol%), LiOt-Bu (24.0 mg, 0.30 mmol, 1.5 equiv) and tetrahydrofuran (thf, 2 mL). The vessel was sealed with a cap (phenolic open top cap with red PTFE/white silicone septum) and the solution was allowed to stir at 22 °C for one hour. Bis(pinacolato)diboron (76.2 mg, 0.30 mmol, 1.5 equiv) was added to the solution, causing it to turn dark brown immediately. The vial was re-sealed with a cap (phenolic open top cap with red PTFE/white silicone septum). The mixture was allowed to stir at 22 °C for 20 min under an atmosphere of N<sub>2</sub>. Diene **1a** (26.0 mg, 0.20 mmol, 1.0 equiv) and **2** (81.7 mg, 0.30 mmol, 1.5 equiv) were added. The resulting solution was allowed to stir at 22 °C for 14 h before the reaction was quenched by passing the mixture through a short plug of celite and silica gel and eluted with Et<sub>2</sub>O (3 × 2 mL). The filtrate was concentrated *in vacuo* to provide yellow oil. The crude was dissolved in tetrahydrofuran (thf, 1.0 mL), NaBO<sub>3</sub>·4H<sub>2</sub>O (123.1 mg, 0.80 mmol, 4.0 equiv) and H<sub>2</sub>O (1 mL) were added. The resulting mixture was allowed to stir at 22 °C for 3 h. The aqueous layer was washed with Et<sub>2</sub>O (3 × 2 mL). The combined organic layers were concentrated *in vacuo* to provide colorless oil, which was purified by silica gel chromatography (dichloromethane : diethyl ether = 30:1) to afford **3a** (26.0 mg, 75% yield) as colorless oil.

#### ■ Characterization of product.

**(E)-2-(Hydroxymethyl)-4-phenylbut-3-enenitrile (3a).** IR (neat): 3440 (br), 2921 (w), 2844 (w), 2249 (w), 1645 (w), 1490 (w), 1450 (w), 1398 (w), 1369 (w), 1288 (w), 1182 (w), 1048 (s), 968 (s), 858 (w), 749 (s), 693 (s) cm<sup>-1</sup>; <sup>1</sup>H NMR (400 MHz, CDCl<sub>3</sub>): δ 7.40-7.28 (m, 5H), 6.80 (d, *J* = 16.0 Hz, 1H), 6.06 (dd, *J* = 16.0, 6.8 Hz, 1H), 3.88 (d, *J* = 5.6 Hz, 2H), 3.66-3.61 (m, 1H), 2.67 (s, 1H); <sup>13</sup>C NMR (100 MHz, CDCl<sub>3</sub>): δ 135.4, 135.3, 128.7, 128.5, 126.6, 119.0, 118.8, 63.3, 38.0; HRMS (ESI<sup>+</sup>) [M+H]<sup>+</sup>: Calcd for C<sub>11</sub>H<sub>12</sub>ON:174.0913 m/z, found: 174.0914 m/z.

**(E)-4-(4-Fluorophenyl)-2-(hydroxymethyl)but-3-enenitrile (3b).** IR (neat): 3422 (br), 2945 (w), 2886 (w), 2247 (w), 1600 (m), 1507 (s), 1467 (w), 1413 (w), 1299 (w), 1226 (s), 1159 (m), 1056 (s), 966 (s), 852 (m), 812 (s) cm<sup>-1</sup>; <sup>1</sup>H NMR (400 MHz, CDCl<sub>3</sub>): δ 7.37-7.34 (m, 2H), 7.05-7.00 (m, 2H), 6.76 (d, *J* = 16.0 Hz, 1H), 5.98 (dd, *J* = 16.0, 6.4 Hz, 1H), 3.89-3.87 (m, 2H), 3.66-3.61 (m, 1H), 2.57 (s, 1H); <sup>13</sup>C NMR (100 MHz, CDCl<sub>3</sub>): δ 162.7 (d, *J* = 247.0 Hz), 134.2, 131.5 (d, *J* = 3.3 Hz), 128.2 (d, *J* = 8.1 Hz), 118.8 (d, *J* = 2.3 Hz), 118.7, 115.7 (d, *J* = 21.7 Hz), 63.3, 38.0; <sup>19</sup>F NMR (376 MHz, CDCl<sub>3</sub>): δ -112.8; HRMS (ESI<sup>+</sup>) [M-H]<sup>+</sup>: Calcd for C<sub>11</sub>H<sub>9</sub>ONF:190.0674 m/z, found: 190.0675 m/z.

**(E)-4-(4-(Dimethylamino)phenyl)-2-(hydroxymethyl)but-3-enenitrile (3c).** IR (neat): 3391 (br), 2918 (w), 2803 (w), 2240 (w), 1646 (w), 1609 (s), 1519 (s), 1477 (w), 1350 (s), 1223 (w), 1164 (w), 1055 (m), 968 (w), 812 (s), 749 (w) cm<sup>-1</sup>; <sup>1</sup>H NMR (400 MHz, CDCl<sub>3</sub>): δ 7.27 (d, *J* = 8.4 Hz, 2H), 6.70-6.66 (m, 3H), 5.80 (dd, *J* = 16.0, 6.8 Hz, 1H), 3.83 (d, *J* = 6.0 Hz, 2H), 3.60-3.56 (m, 1H), 2.97 (s, 6H); <sup>13</sup>C NMR (100



**MHz, CDCl<sub>3</sub>):**  $\delta$  150.6, 135.4, 127.7, 123.5, 119.2, 114.0, 112.2, 63.6, 40.3, 38.1; **HRMS (ESI<sup>+</sup>) [M+H]<sup>+</sup>:** Calcd for C<sub>13</sub>H<sub>17</sub>ON<sub>2</sub>: 217.1335 m/z, found: 217.1337 m/z.

**(E)-2-(Hydroxymethyl)-4-(4-methoxyphenyl)but-3-enitrile (3d).** **IR (neat):** 3243 (br), 2917 (w), 2838 (w), 2243 (w), 1602 (s), 1508 (s), 1423 (m), 1247 (s), 1175 (s), 1058 (s), 1028 (s), 970 (s), 848 (m), 807 (s), 747 (w) cm<sup>-1</sup>; **<sup>1</sup>H NMR (400 MHz, CDCl<sub>3</sub>):**  $\delta$  7.32 (d, *J* = 8.4 Hz, 2H), 6.86 (d, *J* = 8.4 Hz, 2H), 6.72 (d, *J* = 16.0 Hz, 1H), 5.90 (dd, *J* = 16.0, 6.8 Hz, 1H), 3.85 (d, *J* = 6.0 Hz, 2H), 3.81 (s, 3H), 3.63-3.58 (m, 1H), 2.61 (s, 1H); **<sup>13</sup>C NMR (100 MHz, CDCl<sub>3</sub>):**  $\delta$  159.8, 134.8, 128.1, 127.9, 119.0, 116.7, 114.1, 63.4, 55.3, 38.0; **HRMS (ESI<sup>+</sup>) [M+H]<sup>+</sup>:** Calcd for C<sub>12</sub>H<sub>14</sub>O<sub>2</sub>N: 204.1019 m/z, found: 204.1021 m/z.

**(E)-2-(Hydroxymethyl)-4-(2-methoxyphenyl)but-3-enitrile (3e).** **IR (neat):** 3421 (br), 2940 (w), 2885 (w), 2837 (w), 2245 (w), 1596 (w), 1488 (m), 1461 (m), 1436 (w), 1242 (s), 1052 (s), 1023 (s), 970 (s), 750 (s), 694 (w) cm<sup>-1</sup>; **<sup>1</sup>H NMR (400 MHz, CDCl<sub>3</sub>):**  $\delta$  7.38 (dd, *J* = 7.6, 1.2 Hz, 1H), 7.29-7.24 (m, 1H), 7.07 (d, *J* = 16.0 Hz, 1H), 6.95-6.91 (m, 1H), 6.88 (d, *J* = 8.4 Hz, 1H), 6.11 (dd, *J* = 16.0, 7.2 Hz, 1H), 3.88-3.85 (m, 5H), 3.65-3.60 (m, 1H), 2.55 (s, 1H); **<sup>13</sup>C NMR (100 MHz, CDCl<sub>3</sub>):**  $\delta$  156.9, 130.8, 129.6, 127.5, 124.3, 120.6, 119.8, 119.0, 110.9, 63.4, 55.4, 38.5; **HRMS (ESI<sup>+</sup>) [M+H]<sup>+</sup>:** Calcd for C<sub>12</sub>H<sub>14</sub>O<sub>2</sub>N: 204.1019 m/z, found: 204.1021 m/z.

**(E)-2-(Hydroxymethyl)-4-(o-tolyl)but-3-enitrile (3f).** **IR (neat):** 3420 (br), 3032 (w), 2922 (w), 2246 (w), 1603 (w), 1458 (w), 1336 (w), 1261 (w), 1171 (w), 1056 (s), 965 (s), 881 (w), 775 (s), 692 (s), 646 (w) cm<sup>-1</sup>; **<sup>1</sup>H NMR (400 MHz, CDCl<sub>3</sub>):**  $\delta$  7.26-7.18 (m, 3H), 7.11 (d, *J* = 7.6 Hz, 1H), 6.78 (d, *J* = 16.0 Hz, 1H), 6.04 (dd, *J* = 16.0, 6.8 Hz, 1H), 3.90-3.87 (m, 2H), 3.66-3.61 (m, 1H), 2.39-2.32 (m, 4H); **<sup>13</sup>C NMR (100 MHz, CDCl<sub>3</sub>):**  $\delta$  138.3, 135.5, 135.2, 129.3, 128.6, 127.3, 123.7, 118.9, 118.8, 63.3, 38.1, 21.3; **HRMS (ESI<sup>+</sup>) [M-H]<sup>+</sup>:** Calcd for C<sub>12</sub>H<sub>12</sub>ON: 186.0924 m/z, found: 186.0929 m/z.

**(E)-2-(Hydroxymethyl)-4-(3-methoxyphenyl)but-3-enitrile (3g).** **IR (neat):** 3421 (br), 2942 (w), 2886 (w), 2836 (w), 2246 (w), 1599 (m), 1489 (m), 1460 (m), 1431 (m), 1287 (s), 1193 (s), 1044 (s), 965 (s), 775 (s), 687 (s) cm<sup>-1</sup>; **<sup>1</sup>H NMR (400 MHz, CDCl<sub>3</sub>):**  $\delta$  7.28-7.24 (m, 1H), 6.98 (d, *J* = 7.6 Hz, 1H), 6.93-6.90 (m, 1H), 6.85 (dd, *J* = 8.0, 2.0 Hz, 1H), 6.77 (d, *J* = 16.0 Hz, 1H), 6.05 (dd, *J* = 16.0, 6.8 Hz, 1H), 3.90-3.87 (m, 2H), 3.82 (s, 3H), 3.66-3.61 (m, 1H), 2.46-2.43 (m, 1H); **<sup>13</sup>C NMR (100 MHz, CDCl<sub>3</sub>):**  $\delta$  159.8, 136.7, 135.3, 129.7, 119.4, 119.2, 118.7, 114.2, 111.9, 63.3, 55.3, 38.0; **HRMS (ESI<sup>+</sup>) [M-H]<sup>+</sup>:** Calcd for C<sub>12</sub>H<sub>12</sub>O<sub>2</sub>N: 202.0874 m/z, found: 202.0878 m/z.

**(E)-2-(Hydroxymethyl)-4-(naphthalen-2-yl)but-3-enitrile (3h).** **IR (neat):** 3433 (br), 3053 (w), 2920 (w), 2882 (w), 2249 (w), 1594 (w), 1464 (w), 1175 (m), 1052 (s), 966 (s), 898 (w), 866 (w), 814 (s), 750 (s), 627 (w) cm<sup>-1</sup>; **<sup>1</sup>H NMR (400 MHz, CDCl<sub>3</sub>):**  $\delta$  7.82-7.79 (m, 3H), 7.76 (s, 1H), 7.56 (dd, *J* = 8.4, 1.6 Hz, 1H), 7.51-7.46 (m, 2H), 6.96 (d, *J* = 16.0 Hz, 1H), 6.17 (dd, *J* = 16.0, 6.4 Hz, 1H), 3.92 (d, *J* = 5.6 Hz, 2H), 3.71-3.66 (m, 1H), 2.50 (s, 1H); **<sup>13</sup>C NMR (100 MHz, CDCl<sub>3</sub>):**  $\delta$  135.4, 133.3, 133.2,

132.7, 128.4, 128.1, 127.7, 127.2, 126.5, 126.4, 123.1, 119.3, 118.8, 63.3, 38.1; **HRMS (ESI<sup>+</sup>) [M-H]<sup>+</sup>**: Calcd for C<sub>15</sub>H<sub>12</sub>ON: 222.0924 m/z, found: 222.0923 m/z.

**(E)-4-(Furan-3-yl)-2-(hydroxymethyl)but-3-enitrile (3i)**. **IR (neat)**: 3458 (br), 2921 (w), 2851 (w), 2245 (w), 1737 (w), 1636 (w), 1464 (w), 1424 (w), 1347 (w), 1179 (w), 1104 (w), 1016 (w), 968 (w), 769 (w), 704 (w) cm<sup>-1</sup>; **<sup>1</sup>H NMR (400 MHz, CDCl<sub>3</sub>)**: δ 7.48 (s, 1H), 7.41-7.36 (m, 1H), 6.68 (d, *J* = 16.0 Hz, 1H), 6.53-6.49 (m, 1H), 5.78 (dd, *J* = 16.0, 6.4 Hz, 1H), 3.86 (d, *J* = 5.6 Hz, 2H), 3.62-3.57 (m, 1H), 2.23 (s, 1H); **<sup>13</sup>C NMR (100 MHz, CDCl<sub>3</sub>)**: δ 143.9, 141.4, 125.3, 122.6, 118.8, 118.5, 107.2, 63.3, 37.9; **HRMS (ESI<sup>+</sup>) [M-H]<sup>+</sup>**: Calcd for C<sub>9</sub>H<sub>8</sub>O<sub>2</sub>N: 162.0561 m/z, found: 162.0562 m/z.

**(E)-2-(Hydroxymethyl)-4-(thiophen-3-yl)but-3-enitrile (3j)**. **IR (neat)**: 3409 (br), 3099 (w), 2940 (w), 2884 (w), 2245 (w), 1651 (w), 1465 (w), 1413 (w), 1244 (w), 1159 (w), 1054 (s), 962 (s), 864 (w), 769 (s), 693 (w) cm<sup>-1</sup>; **<sup>1</sup>H NMR (400 MHz, CDCl<sub>3</sub>)**: δ 7.30-7.28 (m, 1H), 7.23 (d, *J* = 1.6 Hz, 1H), 7.19 (d, *J* = 4.8 Hz, 1H), 6.79 (d, *J* = 15.6 Hz, 1H), 5.90 (dd, *J* = 15.6, 6.4 Hz, 1H), 3.88-3.80 (m, 2H), 3.62-3.57 (m, 1H), 2.95 (s, 1H); **<sup>13</sup>C NMR (100 MHz, CDCl<sub>3</sub>)**: δ 137.9, 129.3, 126.5, 124.6, 123.7, 118.9, 118.8, 63.1, 37.9; **HRMS (ESI<sup>+</sup>) [M+H]<sup>+</sup>**: Calcd for C<sub>9</sub>H<sub>10</sub>ONS: 180.0478 m/z, found: 180.0479 m/z.

**(E)-Tert-butyl 3-(3-cyano-4-hydroxybut-1-en-1-yl)-1H-pyrrole-1-carboxylate (3k)**. **IR (neat)**: 3408 (br), 2979 (w), 2247 (w), 1714 (m), 1480 (w), 1392 (w), 1366 (w), 1302 (w), 1253 (w), 1149 (m), 1063 (w), 972 (w), 865 (w), 749 (s), 665 (w) cm<sup>-1</sup>; **<sup>1</sup>H NMR (400 MHz, CDCl<sub>3</sub>)**: δ 7.21-7.18 (m, 2H), 6.62 (d, *J* = 16.0 Hz, 1H), 6.32 (s, 1H), 5.76 (dd, *J* = 16.0, 6.4 Hz, 1H), 3.82 (d, *J* = 5.6 Hz, 2H), 3.60-3.55 (m, 1H), 2.88 (s, 1H), 1.58 (s, 9H); **<sup>13</sup>C NMR (100 MHz, CDCl<sub>3</sub>)**: δ 148.5, 127.6, 123.9, 121.2, 119.0, 118.9, 117.3, 109.0, 84.1, 63.3, 38.0, 27.9; **HRMS (ESI<sup>+</sup>) [M+H]<sup>+</sup>**: Calcd for C<sub>14</sub>H<sub>19</sub>O<sub>3</sub>N<sub>2</sub>: 263.1390 m/z, found: 263.1393 m/z.

**(E)-4-Cyclohexyl-2-(hydroxymethyl)but-3-enitrile (3l)**. **IR (neat)**: 3413 (br), 2923 (s), 2850 (m), 2246 (w), 1660 (w), 1447 (m), 1407 (w), 1374 (w), 1309 (w), 1259 (w), 1057 (s), 969 (s), 889 (w), 841 (w), 695 (w) cm<sup>-1</sup>; **<sup>1</sup>H NMR (400 MHz, CDCl<sub>3</sub>)**: δ 5.86 (dd, *J* = 15.6, 6.8 Hz, 1H), 5.27 (dd, *J* = 15.6, 6.4 Hz, 1H), 3.78-3.71 (m, 2H), 3.43-3.38 (m, 1H), 2.35 (s, 1H), 2.04-1.95 (m, 1H), 1.78-1.63 (m, 5H), 1.31-1.02 (m, 5H); **<sup>13</sup>C NMR (100 MHz, CDCl<sub>3</sub>)**: δ 143.1, 119.3, 117.2, 63.4, 40.4, 37.9, 32.4, 32.4, 25.9, 25.8; **HRMS (ESI<sup>+</sup>) [M+H]<sup>+</sup>**: Calcd for C<sub>11</sub>H<sub>18</sub>ON: 180.1383 m/z, found: 180.1384 m/z.

**2-(Hydroxymethyl)-3-methylbut-3-enitrile (5a)**. **IR (neat)**: 3419 (br), 3089 (w), 2978 (w), 2946 (w), 2890 (w), 2247 (w), 1651 (w), 1449 (w), 1379 (w), 1068 (s), 1045 (s), 907 (s), 710 (w), 575 (w), 425 (w) cm<sup>-1</sup>; **<sup>1</sup>H NMR (400 MHz, CDCl<sub>3</sub>)**: δ 5.15 (s, 1H), 5.11 (s, 1H), 3.84 (d, *J* = 6.0 Hz, 2H), 3.40 (t, *J* = 6.0 Hz, 1H), 2.44 (s, 1H), 1.85 (s, 3H); **<sup>13</sup>C NMR (100 MHz, CDCl<sub>3</sub>)**: δ 135.9, 118.9, 116.8, 61.8, 42.3, 20.4; **HRMS (EI<sup>+</sup>) [M]<sup>+</sup>**: Calcd for: C<sub>6</sub>H<sub>9</sub>ON: 111.0682 m/z, found: 111.0680 m/z.

**2-(Hydroxymethyl)-7-methyl-3-methyleneoct-6-enenitrile (5b).** IR (neat): 3424 (br), 3088 (w), 2966 (w), 2915 (w), 2857 (w), 2246 (w), 1648 (w), 1440 (w), 1377 (w), 1185 (w), 1066 (s), 1045 (s), 907 (s), 827 (m), 751 (w)  $\text{cm}^{-1}$ ;  $^1\text{H NMR}$  (400 MHz,  $\text{CDCl}_3$ ):  $\delta$  5.24 (s, 1H), 5.13 (s, 1H), 5.07 (t,  $J = 6.0$  Hz, 1H), 3.86-3.78 (m, 2H), 3.40 (t,  $J = 6.0$  Hz, 1H), 2.43 (s, 1H), 2.21-2.02 (m, 4H), 1.68 (s, 3H), 1.61 (s, 3H);  $^{13}\text{C NMR}$  (100 MHz,  $\text{CDCl}_3$ ):  $\delta$  139.8, 132.9, 122.7, 119.2, 115.5, 62.2, 41.4, 33.9, 26.1, 25.6, 17.7; HRMS (ESI<sup>+</sup>) [ $\text{M}+\text{H}$ ]<sup>+</sup>: Calcd for  $\text{C}_{11}\text{H}_{18}\text{ON}$ : 180.1383 m/z, found: 180.1383 m/z.

**5-(3,3-Dimethyloxiran-2-yl)-2-(hydroxymethyl)-3-methylenepentanenitrile (5c).** IR (neat): 3422 (br), 3091 (w), 2964 (w), 2928 (w), 2884 (w), 2245 (w), 1648 (w), 1454 (w), 1380 (m), 1251 (w), 1114 (m), 1069 (s), 910 (s), 867 (m), 820 (w), 798 (w), 733 (w), 675 (w)  $\text{cm}^{-1}$ ;  $^1\text{H NMR}$  (400 MHz,  $\text{CDCl}_3$ ):  $\delta$  5.27-5.25 (m, 1H), 5.16 (s, 1H), 3.89-3.77 (m, 2H), 3.45-3.38 (m, 1H), 3.11 (s, 1H), 2.77-2.73 (m, 1H), 2.39-2.20 (m, 2H), 1.87-1.76 (m, 1H), 1.69-1.59 (m, 1H), 1.30 (s, 3H), 1.27 (s, 3H);  $^{13}\text{C NMR}$  (100 MHz,  $\text{CDCl}_3$ ):  $\delta$  139.4, 139.2, 119.1, 119.0, 116.2, 115.9, 63.7, 63.6, 62.3, 62.2, 58.9, 58.8, 41.5, 41.1, 31.1, 30.9, 26.9, 26.8, 24.7, 18.7; HRMS (ESI<sup>+</sup>) [ $\text{M}+\text{NH}_4$ ]<sup>+</sup>: Calcd for  $\text{C}_{11}\text{H}_{21}\text{O}_2\text{N}_2$ : 213.1598 m/z, found: 213.1595 m/z.

**2-(Hydroxymethyl)-3-methylene-5-(2,2,5,5-tetramethyl-1,3-dioxolan-4-yl)pentanenitrile (5d).** IR (neat): 3447 (br), 2980 (w), 2934 (w), 2875 (w), 2247 (w), 1649 (w), 1459 (w), 1372 (m), 1216 (m), 1111 (m), 1065 (m), 1001 (s), 909 (s), 855 (m), 823 (w), 730 (s)  $\text{cm}^{-1}$ ;  $^1\text{H NMR}$  (400 MHz,  $\text{CDCl}_3$ ):  $\delta$  5.28-5.27 (m, 1H), 5.15 (s, 1H), 3.85 (d,  $J = 6.0$  Hz, 2H), 3.69-3.67 (m, 1H), 3.44-3.40 (m, 1H), 2.79 (s, 1H), 2.44-2.11 (m, 2H), 1.74-1.52 (m, 2H), 1.40 (s, 3H), 1.31 (s, 3H), 1.24 (s, 3H), 1.09 (s, 3H);  $^{13}\text{C NMR}$  (100 MHz,  $\text{CDCl}_3$ ):  $\delta$  139.6, 139.5, 119.1, 115.8, 115.7, 106.9, 82.5, 82.4, 80.2, 80.1, 62.2, 41.6, 41.4, 31.4, 31.3, 28.4, 27.2, 27.1, 26.8, 25.9, 25.8, 24.8, 22.9; HRMS (ESI<sup>+</sup>) [ $\text{M}+\text{H}$ ]<sup>+</sup>: Calcd for  $\text{C}_{14}\text{H}_{24}\text{O}_3\text{N}$ : 254.1751 m/z, found: 254.1750 m/z.

**2-(Hydroxymethyl)-6-((4-methoxybenzyl)oxy)-3-methylenehexanenitrile (5e).** IR (neat): 3426 (br), 3001 (w), 2936 (w), 2860 (w), 2245 (w), 1611 (w), 1512 (m), 1362 (w), 1300 (w), 1245 (s), 1174 (m), 1031 (s), 909 (s), 818 (m), 729 (s), 646 (w)  $\text{cm}^{-1}$ ;  $^1\text{H NMR}$  (400 MHz,  $\text{CDCl}_3$ ):  $\delta$  7.25 (d,  $J = 8.4$  Hz, 2H), 6.88 (d,  $J = 8.4$  Hz, 2H), 5.23 (s, 1H), 5.11 (s, 1H), 4.42 (s, 2H), 3.80 (s, 3H), 3.80-3.73 (m, 2H), 3.48 (t,  $J = 6.0$  Hz, 2H), 3.36 (t,  $J = 6.0$  Hz, 1H), 2.79 (s, 1H), 2.27-2.08 (m, 2H), 1.82-1.74 (m, 2H);  $^{13}\text{C NMR}$  (100 MHz,  $\text{CDCl}_3$ ):  $\delta$  159.2, 139.7, 130.1, 129.4, 119.2, 115.4, 113.7, 72.6, 68.9, 62.1, 55.2, 41.3, 30.6, 27.5; HRMS (ESI<sup>+</sup>) [ $\text{M}+\text{NH}_4$ ]<sup>+</sup>: Calcd for  $\text{C}_{16}\text{H}_{25}\text{O}_3\text{N}_2$ : 293.1860 m/z, found: 293.1865 m/z.

**6-((Tert-butyl)dimethylsilyloxy)-2-(hydroxymethyl)-3-methylenehexanenitrile (5f).** IR (neat): 3429 (br), 2952 (w), 2929 (w), 2885 (w), 2856 (w), 2246 (w), 1649 (w), 1502 (w), 1253 (m), 1100 (m), 909 (w), 833 (s), 774 (s), 732 (w), 662 (w)  $\text{cm}^{-1}$ ;  $^1\text{H NMR}$  (400 MHz,  $\text{CDCl}_3$ ):  $\delta$  5.26 (s, 1H), 5.13 (s, 1H), 3.88-3.80 (m, 2H), 3.64 (t,  $J = 6.0$  Hz, 2H), 3.42 (t,  $J = 6.0$  Hz, 1H), 2.52 (s, 1H), 2.27-2.10 (m, 2H), 1.74-1.67 (m, 2H), 0.89 (s, 9H), 0.05 (s, 6H);  $^{13}\text{C NMR}$  (100 MHz,  $\text{CDCl}_3$ ):  $\delta$  139.8, 119.2, 115.5,

62.2, 62.0, 41.4, 30.4, 30.1, 25.9, 18.3, -5.4; **HRMS (ESI<sup>+</sup>) [M+H]<sup>+</sup>**: Calcd for C<sub>14</sub>H<sub>28</sub>O<sub>2</sub>NSi: 270.1884 m/z, found: 270.1877 m/z.

**Tert-butyl 5-cyano-6-hydroxy-4-methylenehexanoate (5g).** **IR (neat)**: 3467 (br), 2979 (w), 2933 (w), 2250 (w), 1718 (m), 1650 (w), 1391 (w), 1253 (w), 1147 (s), 1067 (w), 980 (w), 910 (s), 844 (w), 729 (s), 647 (w) cm<sup>-1</sup>; **<sup>1</sup>H NMR (400 MHz, CDCl<sub>3</sub>)**: δ 5.26 (s, 1H), 5.08 (s, 1H), 3.88 (d, *J* = 5.6 Hz, 2H), 3.40 (t, *J* = 6.0 Hz, 1H), 3.22 (s, 1H), 2.50 (t, *J* = 6.8 Hz, 2H), 2.44-2.29 (m, 2H), 1.42 (s, 9H); **<sup>13</sup>C NMR (100 MHz, CDCl<sub>3</sub>)**: δ 172.4, 139.1, 118.8, 115.4, 81.3, 62.2, 41.6, 32.8, 28.0, 27.8; **HRMS (ESI<sup>+</sup>) [M+NH<sub>4</sub>]<sup>+</sup>**: Calcd for C<sub>12</sub>H<sub>23</sub>O<sub>3</sub>N<sub>2</sub>: 243.1703 m/z, found: 243.1694 m/z.

**2-(Hydroxymethyl)-3-phenylbut-3-enenitrile (5h).** (3.5:1 mixture of two regioisomers). **IR (neat)**: 3427 (br), 2937 (w), 2886 (w), 2248 (w), 1630 (w), 1493 (w), 1410 (w), 1187 (w), 1064 (s), 1029 (s), 915 (m), 772 (m), 700 (s), 621 (w) cm<sup>-1</sup>; **<sup>1</sup>H NMR (400 MHz, CDCl<sub>3</sub>)**: δ 7.48-7.31 (m, 5H), 6.08-5.45 (m, 2H), 4.07-3.68 (m, 3H), 2.83-2.66 (m, 1H); **<sup>13</sup>C NMR (100 MHz, CDCl<sub>3</sub>)**: δ 139.8, 137.8, 135.6, 133.9, 129.1, 128.8, 128.6, 128.5, 126.5, 126.3, 119.9, 119.5, 119.2, 117.8, 68.2, 62.5, 53.2, 40.7; **HRMS (ESI<sup>+</sup>) [M+H]<sup>+</sup>**: Calcd for C<sub>11</sub>H<sub>12</sub>ON: 174.0913 m/z, found: 174.0913 m/z.

**(E)-2-(Hydroxymethyl)-3-methyl-4-phenylbut-3-enenitrile (6a).** **IR (neat)**: 3417 (br), 3027 (w), 2945 (w), 2886 (w), 2246 (w), 1490 (w), 1443 (m), 1381 (w), 1041 (s), 921 (w), 867 (w), 748 (s), 699 (s), 571 (w), 513 (m) cm<sup>-1</sup>; **<sup>1</sup>H NMR (400 MHz, CDCl<sub>3</sub>)**: δ 7.39-7.32 (m, 2H), 7.29-7.23 (m, 3H), 6.64 (s, 1H), 3.95-3.88 (m, 2H), 3.53 (t, *J* = 6.4 Hz, 1H), 2.70 (s, 1H), 1.97 (s, 3H); **<sup>13</sup>C NMR (100 MHz, CDCl<sub>3</sub>)**: δ 136.2, 130.9, 128.8, 128.5, 128.2, 127.2, 119.1, 62.2, 44.5, 16.2; **HRMS (ESI<sup>+</sup>) [M+H]<sup>+</sup>**: Calcd for C<sub>12</sub>H<sub>14</sub>ON: 188.1070 m/z, found: 188.1072 m/z.

**(E)-2-(Hydroxymethyl)-3-methyl-4-(o-tolyl)but-3-enenitrile (6b).** **IR (neat)**: 3417 (br), 3024 (w), 2920 (w), 2887 (w), 2244 (w), 1601 (w), 1443 (w), 1244 (w), 1168 (w), 1043 (s), 913 (w), 785 (s), 742 (m), 697 (s), 514 (w), 441 (w) cm<sup>-1</sup>; **<sup>1</sup>H NMR (400 MHz, CDCl<sub>3</sub>)**: δ 7.28-7.22 (m, 1H), 7.11-7.05 (m, 3H), 6.61 (s, 1H), 3.96-3.88 (m, 2H), 3.53 (t, *J* = 6.4 Hz, 1H), 2.54 (s, 1H), 2.36 (s, 3H), 1.98 (d, *J* = 1.2 Hz, 3H); **<sup>13</sup>C NMR (100 MHz, CDCl<sub>3</sub>)**: δ 137.9, 136.1, 131.1, 129.6, 128.3, 128.2, 128.0, 125.9, 119.0, 62.3, 44.5, 21.4, 16.2; **HRMS (EI<sup>+</sup>) [M]<sup>+</sup>**: Calcd for: C<sub>13</sub>H<sub>15</sub>ON: 201.1154 m/z, found: 201.1150 m/z.

**(E)-4-(2-Bromophenyl)-2-(hydroxymethyl)-3-methylbut-3-enenitrile (6c).** **IR (neat)**: 3424 (br), 2938 (w), 2887 (w), 2246 (w), 1653 (w), 1463 (m), 1431 (m), 1386 (w), 1268 (w), 1024 (s), 850 (w), 749 (s), 666 (w), 524 (w), 444 (w) cm<sup>-1</sup>; **<sup>1</sup>H NMR (400 MHz, CDCl<sub>3</sub>)**: δ 7.58 (d, *J* = 8.0 Hz, 1H), 7.33-7.27 (m, 1H), 7.22 (d, *J* = 6.4 Hz, 1H), 7.18-7.12 (m, 1H), 6.61 (s, 1H), 4.00-3.90 (m, 2H), 3.58 (t, *J* = 6.4 Hz, 1H), 2.55 (s, 1H), 1.83 (s, 3H); **<sup>13</sup>C NMR (100 MHz, CDCl<sub>3</sub>)**: δ 136.5, 132.5, 130.7, 130.5, 130.4, 129.0, 127.1, 123.8, 118.7, 62.1, 43.5, 15.9; **HRMS (EI<sup>+</sup>) [M]<sup>+</sup>**: Calcd for: C<sub>12</sub>H<sub>12</sub>ONBr: 265.0102 m/z, found: 265.0100 m/z.

**(E)-4-(4-Bromophenyl)-2-(hydroxymethyl)-3-methylbut-3-enitrile (6d).** IR (neat): 3417 (br), 2941 (w), 2885 (w), 2245 (w), 1650 (w), 1586 (w), 1482 (m), 1398 (w), 1308 (w), 1066 (s), 1007 (s), 872 (m), 811 (m), 662 (w), 509 (s)  $\text{cm}^{-1}$ ;  $^1\text{H NMR}$  (400 MHz,  $\text{CDCl}_3$ ):  $\delta$  7.47 (d,  $J = 8.4$  Hz, 2H), 7.11 (d,  $J = 8.4$  Hz, 2H), 6.56 (s, 1H), 3.92 (d,  $J = 6.0$  Hz, 2H), 3.52 (t,  $J = 6.4$  Hz, 1H), 2.57 (s, 1H), 1.94 (s, 3H);  $^{13}\text{C NMR}$  (100 MHz,  $\text{CDCl}_3$ ):  $\delta$  135.0, 131.4, 130.5, 129.8, 129.5, 121.2, 118.9, 62.12, 44.4, 16.3; HRMS (EI<sup>+</sup>) [M]<sup>+</sup>: Calcd for:  $\text{C}_{12}\text{H}_{12}\text{ONBr}$ : 265.0102 m/z, found: 265.0090 m/z.

**(E)-4-(4-Fluorophenyl)-2-(hydroxymethyl)-3-methylbut-3-enitrile (6e).** IR (neat): 3419 (br), 2946 (w), 2888 (w), 2246 (w), 1599 (m), 1506 (s), 1443 (w), 1404 (w), 1224 (s), 1159 (m), 1044 (s), 873 (m), 828 (s), 669 (w), 522 (s)  $\text{cm}^{-1}$ ;  $^1\text{H NMR}$  (400 MHz,  $\text{CDCl}_3$ ):  $\delta$  7.24-7.18 (m, 2H), 7.07-7.00 (m, 2H), 6.58 (s, 1H), 3.94-3.87 (m, 2H), 3.52 (t,  $J = 6.4$  Hz, 1H), 2.90 (s, 1H), 1.93 (d,  $J = 1.2$  Hz, 3H);  $^{13}\text{C NMR}$  (100 MHz,  $\text{CDCl}_3$ ):  $\delta$  161.7 (d,  $J = 246.1$  Hz), 132.2 (d,  $J = 3.4$  Hz), 130.5 (d,  $J = 8.0$  Hz), 129.8 (d,  $J = 2.3$  Hz), 128.6 (d,  $J = 1.5$  Hz), 119.1, 115.2 (d,  $J = 21.5$  Hz), 62.2, 44.4, 16.1;  $^{19}\text{F NMR}$  (376 MHz,  $\text{CDCl}_3$ ):  $\delta$  -114.3; HRMS (ESI<sup>+</sup>) [M+H]<sup>+</sup>: Calcd for:  $\text{C}_{12}\text{H}_{13}\text{ONF}$ : 206.0976 m/z, found: 206.0976 m/z.

**(E)-2-(Hydroxymethyl)-3-methyl-4-(3-(trifluoromethyl)phenyl)but-3-enitrile (6f).** IR (neat): 3431 (br), 2941 (w), 2248 (w), 1442 (w), 1326 (s), 1208 (w), 1164 (m), 1121 (s), 1069 (s), 909 (m), 802 (m), 701 (m), 657 (w), 576 (w), 519 (w)  $\text{cm}^{-1}$ ;  $^1\text{H NMR}$  (400 MHz,  $\text{CDCl}_3$ ):  $\delta$  7.55-7.40 (m, 4H), 6.67 (s, 1H), 3.98-3.91 (m, 2H), 3.56 (t,  $J = 6.4$  Hz, 1H), 2.79 (s, 1H), 1.96 (d,  $J = 0.8$  Hz, 3H);  $^{13}\text{C NMR}$  (100 MHz,  $\text{CDCl}_3$ ):  $\delta$  136.9, 132.1, 130.7, 130.6 (q,  $J = 32.0$  Hz), 129.4, 128.8, 125.5 (q,  $J = 3.8$  Hz), 124.0 (q,  $J = 271.0$  Hz), 123.9 (q,  $J = 3.8$  Hz), 118.9, 62.2, 44.4, 16.2;  $^{19}\text{F NMR}$  (376 MHz,  $\text{CDCl}_3$ ):  $\delta$  -62.7; HRMS (ESI<sup>+</sup>) [M-H]<sup>+</sup>: Calcd for  $\text{C}_{13}\text{H}_{11}\text{ONF}_3$ : 254.0798 m/z, found: 254.0797 m/z.

**(E)-4-(3-Chlorophenyl)-2-(hydroxymethyl)-3-methylbut-3-enitrile (6g).** IR (neat): 3418 (br), 2939 (w), 2888 (w), 2246 (w), 1654 (w), 1592 (w), 1564 (m), 1471 (m), 1417 (m), 1214 (w), 1043 (s), 891 (m), 781 (s), 683 (s), 442 (w)  $\text{cm}^{-1}$ ;  $^1\text{H NMR}$  (400 MHz,  $\text{CDCl}_3$ ):  $\delta$  7.32-7.22 (m, 3H), 7.12 (d,  $J = 7.2$  Hz, 1H), 6.59 (s, 1H), 3.98-3.89 (m, 2H), 3.53 (t,  $J = 6.4$  Hz, 1H), 2.44 (s, 1H), 1.96 (d,  $J = 1.2$  Hz, 3H);  $^{13}\text{C NMR}$  (100 MHz,  $\text{CDCl}_3$ ):  $\delta$  138.0, 134.1, 130.1, 129.6, 129.5, 128.8, 127.3, 127.0, 118.8, 62.2, 44.3, 16.3; HRMS (EI<sup>+</sup>) [M]<sup>+</sup>: Calcd for:  $\text{C}_{12}\text{H}_{12}\text{ONCl}$ : 221.0607 m/z, found: 221.0611 m/z.

**(E)-Methyl 3-(3-cyano-4-hydroxy-2-methylbut-1-en-1-yl)benzoate (6h).** IR (neat): 3466 (br), 2950 (w), 2887 (w), 2245 (w), 1713 (s), 1438 (m), 1287 (s), 1208 (s), 1108 (m), 1044 (m), 920 (w), 859 (w), 750 (s), 707 (w), 535 (w)  $\text{cm}^{-1}$ ;  $^1\text{H NMR}$  (400 MHz,  $\text{CDCl}_3$ ):  $\delta$  7.94-7.88 (m, 2H), 7.44-7.39 (m, 2H), 6.65 (s, 1H), 3.97-3.91 (m, 2H), 3.91 (s, 3H), 3.55 (t,  $J = 6.4$  Hz, 1H), 2.90 (t,  $J = 5.6$  Hz, 1H), 1.96 (s, 3H);  $^{13}\text{C NMR}$  (100 MHz,  $\text{CDCl}_3$ ):  $\delta$  167.0, 136.5, 133.3, 130.1, 130.0, 129.9, 129.8, 128.4, 128.3, 118.9, 62.2, 52.2, 44.3, 16.2; HRMS (ESI<sup>+</sup>) [M+NH<sub>4</sub>]<sup>+</sup>: Calcd for  $\text{C}_{14}\text{H}_{19}\text{O}_3\text{N}_2$ : 263.1390 m/z, found: 263.1391 m/z.

**(E)-2-(Hydroxymethyl)-4-(3-methoxyphenyl)-3-methylbut-3-enitrile (6i).** IR (neat): 3449 (br), 2942 (w), 2839 (w), 2245 (w), 1583 (m), 1483 (m), 1376 (w), 1263 (m), 1160 (m), 1040 (s), 882 (m), 782 (m), 693 (m), 559 (w), 513 (w)  $\text{cm}^{-1}$ ;  $^1\text{H NMR}$  (400 MHz,  $\text{CDCl}_3$ ):  $\delta$  7.30-7.24 (m, 1H), 6.87-6.78 (m, 3H), 6.62 (s, 1H), 3.96-3.89 (m, 2H), 3.81 (s, 3H), 3.53 (t,  $J = 6.4$  Hz, 1H), 2.40 (s, 1H), 1.98 (d,  $J = 1.2$  Hz, 3H);  $^{13}\text{C NMR}$  (100 MHz,  $\text{CDCl}_3$ ):  $\delta$  159.4, 137.5, 130.8, 129.3, 128.8, 121.3, 119.0, 114.5, 112.7, 62.2, 55.2, 44.4, 16.3; HRMS (EI<sup>+</sup>) [M]<sup>+</sup>: Calcd for:  $\text{C}_{13}\text{H}_{15}\text{O}_2\text{N}$ : 217.1103 m/z, found: 217.1098 m/z.

**(E)-2-(Hydroxymethyl)-3-methyl-4-(thiophen-3-yl)but-3-enitrile (6j).** IR (neat): 3446 (br), 3095 (w), 2943 (w), 2890 (w), 2245 (w), 1448 (w), 1391 (m), 1342 (w), 1183 (m), 1062 (s), 1020 (s), 878 (m), 771 (s), 629 (m), 532 (s)  $\text{cm}^{-1}$ ;  $^1\text{H NMR}$  (400 MHz,  $\text{CDCl}_3$ ):  $\delta$  7.31 (dd,  $J = 5.2, 3.2$  Hz, 1H), 7.21 (d,  $J = 1.6$  Hz, 1H), 7.10 (d,  $J = 5.2$  Hz, 1H), 6.58 (s, 1H), 3.92-3.85 (m, 2H), 3.51 (t,  $J = 6.4$  Hz, 1H), 2.60 (s, 1H), 2.02 (s, 3H);  $^{13}\text{C NMR}$  (100 MHz,  $\text{CDCl}_3$ ):  $\delta$  137.2, 128.3, 127.4, 125.4, 125.1, 123.9, 119.0, 62.2, 44.5, 16.7; HRMS (ESI<sup>+</sup>) [M+H]<sup>+</sup>: Calcd for  $\text{C}_{10}\text{H}_{12}\text{ONS}$ : 194.0634 m/z, found: 194.0635 m/z.

**(E)-4-(Furan-2-yl)-2-(hydroxymethyl)-3-methylbut-3-enitrile (6k).** IR (neat): 3443 (br), 2923 (s), 2855 (m), 2216 (w), 1712 (m), 1659 (m), 1442 (m), 1389 (m), 1255 (w), 1059 (s), 1015 (s), 801 (w), 747 (w), 597 (w), 567 (w)  $\text{cm}^{-1}$ ;  $^1\text{H NMR}$  (400 MHz,  $\text{CDCl}_3$ ):  $\delta$  7.41 (d,  $J = 1.6$  Hz, 1H), 6.42 (dd,  $J = 3.2, 1.6$  Hz, 1H), 6.40 (s, 1H), 6.34 (d,  $J = 3.2$  Hz, 1H), 3.92-3.85 (m, 2H), 3.49 (t,  $J = 6.4$  Hz, 1H), 2.43 (s, 1H), 2.12 (s, 3H);  $^{13}\text{C NMR}$  (100 MHz,  $\text{CDCl}_3$ ):  $\delta$  151.5, 142.1, 126.2, 119.2, 118.8, 111.3, 110.6, 62.2, 44.6, 16.8; HRMS (ESI<sup>+</sup>) [M+H]<sup>+</sup>: Calcd for  $\text{C}_{10}\text{H}_{12}\text{O}_2\text{N}$ : 178.0863 m/z, found: 178.0864 m/z.

**(E)-2-(Hydroxymethyl)-3-methyl-4-(thiophen-2-yl)but-3-enitrile (6l).** IR (neat): 3445 (br), 3101 (w), 2943 (w), 2890 (w), 2242 (w), 1638 (w), 1399 (m), 1182 (m), 1059 (s), 1014 (s), 881 (m), 848 (m), 817 (m), 703 (s), 563 (s), 525 (s)  $\text{cm}^{-1}$ ;  $^1\text{H NMR}$  (400 MHz,  $\text{CDCl}_3$ ):  $\delta$  7.31 (d,  $J = 4.8$  Hz, 1H), 7.06-7.02 (m, 2H), 6.74 (s, 1H), 3.90-3.83 (m, 2H), 3.51 (t,  $J = 6.4$  Hz, 1H), 2.88 (t,  $J = 6.0$  Hz, 1H), 2.08 (s, 3H);  $^{13}\text{C NMR}$  (100 MHz,  $\text{CDCl}_3$ ):  $\delta$  139.0, 128.4, 126.9, 126.0, 126.0, 123.9, 118.9, 62.1, 44.7, 16.9; HRMS (ESI<sup>+</sup>) [M-H]<sup>+</sup>: Calcd for  $\text{C}_{10}\text{H}_{10}\text{ONS}$ : 192.0489 m/z, found: 192.0488 m/z.

**(E)-Tert-butyl-2-(3-cyano-4-hydroxy-2-methylbut-1-en-1-yl)-1H-pyrrole-1-carboxylate (6m).** IR (neat): 3359 (br), 2925 (m), 2854 (w), 2248 (w), 1731 (m), 1665 (m), 1462 (w), 1369 (w), 1325 (m), 1153 (s), 1064 (w), 1023 (w), 842 (w), 768 (w)  $\text{cm}^{-1}$ ;  $^1\text{H NMR}$  (400 MHz,  $\text{CDCl}_3$ ):  $\delta$  7.23-7.20 (m, 1H), 6.80 (s, 1H), 6.21-6.14 (m, 2H), 3.94-3.83 (m, 2H), 3.51 (t,  $J = 6.4$  Hz, 1H), 3.06 (s, 1H), 1.95 (s, 3H), 1.57 (s, 9H);  $^{13}\text{C NMR}$  (100 MHz,  $\text{CDCl}_3$ ):  $\delta$  149.2, 129.9, 127.6, 122.6, 121.5, 118.7, 114.7, 110.7, 84.2, 61.9, 43.5, 27.9, 16.3; HRMS (ESI<sup>+</sup>) [M+H]<sup>+</sup>: Calcd for  $\text{C}_{15}\text{H}_{21}\text{O}_3\text{N}_2$ : 277.1547 m/z, found: 277.1549 m/z.

**(E)-2-Methyl-4-phenyl-2-((4,4,5,5-tetramethyl-1,3,2-dioxaborolan-2-yl)methyl)but-3-enitrile (7a).** IR (neat): 2978 (w), 2933 (w), 2236 (w), 1450 (w),

1362 (s), 1333 (s), 1253 (w), 1215 (w), 1139 (s), 1074 (w), 966 (s), 878 (w), 845 (s), 748 (s), 693 (w)  $\text{cm}^{-1}$ ;  **$^1\text{H}$  NMR (400 MHz,  $\text{CDCl}_3$ ):**  $\delta$  7.42-7.29 (m, 4H), 7.29-7.23 (m, 1H), 6.76 (d,  $J = 16.0$  Hz, 1H), 6.16 (d,  $J = 16.0$  Hz, 1H), 1.62 (s, 3H), 1.42 (s, 2H), 1.25 (s, 12H);  **$^{13}\text{C}$  NMR (100 MHz,  $\text{CDCl}_3$ ):**  $\delta$  136.0, 131.0, 129.3, 128.6, 127.9, 126.5, 123.6, 83.7, 36.2, 27.5, 24.8, 24.7; **HRMS (ESI<sup>+</sup>)  $[\text{M}+\text{NH}_4]^+$ :** Calcd for  $\text{C}_{18}\text{H}_{28}\text{O}_2\text{N}_2\text{B}$ : 314.2275 m/z, found: 314.2274 m/z.

**(E)-2-(Hydroxymethyl)-4-(4-methoxyphenyl)-2-methylbut-3-enitrile (7b).** **IR (neat):** 3442 (br), 2936 (w), 2877 (w), 2837 (w), 2239 (w), 1606 (s), 1510 (s), 1420 (m), 1246 (s), 1175 (s), 1053 (s), 1030 (s), 966 (s), 849 (w), 809 (s)  $\text{cm}^{-1}$ ;  **$^1\text{H}$  NMR (400 MHz,  $\text{CDCl}_3$ ):**  $\delta$  7.33 (d,  $J = 8.8$  Hz, 2H), 6.86 (d,  $J = 8.8$  Hz, 2H), 6.79 (d,  $J = 16.0$  Hz, 1H), 5.81 (d,  $J = 16.0$  Hz, 1H), 3.81 (s, 3H), 3.69 (d,  $J = 4.0$  Hz, 2H), 2.44 (s, 1H), 1.52 (s, 3H);  **$^{13}\text{C}$  NMR (100 MHz,  $\text{CDCl}_3$ ):**  $\delta$  159.7, 132.4, 128.1, 127.9, 123.5, 121.8, 114.1, 68.5, 55.3, 42.8, 21.9; **HRMS (ESI<sup>+</sup>)  $[\text{M}+\text{H}]^+$ :** Calcd for  $\text{C}_{13}\text{H}_{16}\text{O}_2\text{N}$ : 218.1176 m/z, found: 218.1177 m/z.

**(E)-2-(Hydroxymethyl)-4-(3-methoxyphenyl)-2-methylbut-3-enitrile (7c).** **IR (neat):** 3448 (br), 2938 (w), 2877 (w), 2837 (w), 2241 (w), 1599 (m), 1581 (m), 1489 (m), 1458 (m), 1265 (m), 1159 (m), 1047 (s), 966 (m), 932 (w), 777 (m), 688 (m)  $\text{cm}^{-1}$ ;  **$^1\text{H}$  NMR (400 MHz,  $\text{CDCl}_3$ ):**  $\delta$  7.27-7.22 (m, 1H), 6.99 (d,  $J = 7.6$  Hz, 1H), 6.93-6.91 (m, 1H), 6.83 (dd,  $J = 8.0, 2.4$  Hz, 1H), 6.82 (d,  $J = 16.0$  Hz, 1H), 5.96 (d,  $J = 16.0$  Hz, 1H), 3.81 (s, 3H), 3.70 (d,  $J = 4.0$  Hz, 2H), 2.68 (s, 1H), 1.52 (s, 3H);  **$^{13}\text{C}$  NMR (100 MHz,  $\text{CDCl}_3$ ):**  $\delta$  159.8, 136.8, 132.8, 129.7, 126.2, 121.6, 119.2, 114.1, 111.9, 68.3, 55.2, 42.8, 21.8; **HRMS (ESI<sup>+</sup>)  $[\text{M}+\text{H}]^+$ :** Calcd for  $\text{C}_{13}\text{H}_{16}\text{O}_2\text{N}$ : 218.1176 m/z, found: 218.1177 m/z.

**(E)-4-(3-Fluorophenyl)-2-methyl-2-((4,4,5,5-tetramethyl-1,3,2-dioxaborolan-2-yl)methyl)but-3-enitrile (7d).** **IR (neat):** 2979 (w), 2931 (w), 2236 (w), 1611 (w), 1583 (m), 1446 (w), 1362 (s), 1334 (s), 1267 (m), 1217 (m), 1139 (s), 965 (s), 875 (m), 845 (s), 778 (s), 683 (s)  $\text{cm}^{-1}$ ;  **$^1\text{H}$  NMR (400 MHz,  $\text{CDCl}_3$ ):**  $\delta$  7.33-7.25 (m, 1H), 7.13 (d,  $J = 8.0$  Hz, 1H), 7.07 (d,  $J = 10.0$  Hz, 1H), 6.99-6.92 (m, 1H), 6.73 (d,  $J = 16.0$  Hz, 1H), 6.17 (d,  $J = 16.0$  Hz, 1H), 1.61 (s, 3H), 1.41 (s, 2H), 1.25 (s, 12H);  **$^{13}\text{C}$  NMR (100 MHz,  $\text{CDCl}_3$ ):**  $\delta$  163.0 (d,  $J = 244.3$  Hz), 138.4 (d,  $J = 7.7$  Hz), 132.4, 130.1 (d,  $J = 8.3$  Hz), 128.4 (d,  $J = 2.7$  Hz), 123.4, 122.5 (d,  $J = 2.7$  Hz), 114.7 (d,  $J = 21.3$  Hz), 112.9 (d,  $J = 21.8$  Hz), 83.8, 36.3, 27.4, 24.8, 24.7;  **$^{19}\text{F}$  NMR (376 MHz,  $\text{CDCl}_3$ ):**  $\delta$  -113.3; **HRMS (ESI<sup>+</sup>)  $[\text{M}+\text{NH}_4]^+$ :** Calcd for  $\text{C}_{18}\text{H}_{27}\text{O}_2\text{N}_2\text{BF}$ : 332.2180 m/z, found: 332.2181 m/z.

**(E)-4-(3-Chlorophenyl)-2-methyl-2-((4,4,5,5-tetramethyl-1,3,2-dioxaborolan-2-yl)methyl)but-3-enitrile (7e).** **IR (neat):** 2978 (w), 2933 (w), 2236 (w), 1594 (w), 1565 (w), 1473 (w), 1362 (s), 1334 (s), 1213 (m), 1139 (s), 966 (s), 878 (m), 845 (s), 779 (s), 684 (s)  $\text{cm}^{-1}$ ;  **$^1\text{H}$  NMR (400 MHz,  $\text{CDCl}_3$ ):**  $\delta$  7.36 (s, 1H), 7.27-7.20 (m, 3H), 6.70 (d,  $J = 16.0$  Hz, 1H), 6.17 (d,  $J = 16.0$  Hz, 1H), 1.60 (s, 3H), 1.40 (s, 2H), 1.24 (s, 12H);  **$^{13}\text{C}$  NMR (100 MHz,  $\text{CDCl}_3$ ):**  $\delta$  137.9, 134.5, 132.6, 129.8, 128.1, 127.8, 126.3,

124.9, 123.3, 83.8, 36.3, 27.4, 24.8, 24.7; **HRMS (ESI<sup>+</sup>) [M+H]<sup>+</sup>**: Calcd for C<sub>18</sub>H<sub>24</sub>O<sub>2</sub>NBCl: 331.1619 m/z, found: 331.1615 m/z.

**(E)-2-Methyl-2-((4,4,5,5-tetramethyl-1,3,2-dioxaborolan-2-yl)methyl)-4-(3-(trifluoromethyl)phenyl)but-3-enenitrile (7f)**. **IR (neat)**: 2980 (w), 2935 (w), 2237 (w), 1446 (w), 1365 (m), 1332 (s), 1260 (w), 1204 (w), 1165 (m), 1127 (s), 968 (m), 876 (m), 846 (m), 797 (s), 698 (w) cm<sup>-1</sup>; **<sup>1</sup>H NMR (400 MHz, CDCl<sub>3</sub>)**: δ 7.63 (s, 1H), 7.55-7.49 (m, 2H), 7.48-7.41 (m, 1H), 6.79 (d, *J* = 16.0 Hz, 1H), 6.25 (d, *J* = 16.0 Hz, 1H), 1.62 (s, 3H), 1.42 (s, 2H), 1.25 (s, 12H); **<sup>13</sup>C NMR (100 MHz, CDCl<sub>3</sub>)**: δ 136.9, 133.1, 131.0 (q, *J* = 32.2 Hz), 129.9, 129.1, 128.1, 124.4 (q, *J* = 3.7 Hz), 124.0 (q, *J* = 270.9 Hz), 123.3, 123.0 (q, *J* = 3.8 Hz), 83.8, 36.3, 27.4, 24.8, 24.7; **<sup>19</sup>F NMR (376 MHz, CDCl<sub>3</sub>)**: δ -62.9; **HRMS (ESI<sup>+</sup>) [M+NH<sub>4</sub>]<sup>+</sup>**: Calcd for C<sub>19</sub>H<sub>27</sub>O<sub>2</sub>N<sub>2</sub>BF<sub>3</sub>: 382.2149 m/z, found: 382.2148 m/z.

**(E)-Methyl 3-(3-cyano-4-hydroxy-3-methylbut-1-en-1-yl)benzoate (7g)**. **IR (neat)**: 3474 (br), 2920 (w), 2874 (w), 2240 (w), 1700 (s), 1588 (w), 1432 (m), 1295 (s), 1205 (s), 1107 (s), 1083 (s), 968 (s), 808 (w), 746 (s), 647 (m) cm<sup>-1</sup>; **<sup>1</sup>H NMR (400 MHz, CDCl<sub>3</sub>)**: δ 8.06 (s, 1H), 7.92 (d, *J* = 7.6 Hz, 1H), 7.54 (d, *J* = 8.0 Hz, 1H), 7.42-7.36 (m, 1H), 6.87 (d, *J* = 16.0 Hz, 1H), 6.07 (d, *J* = 16.0 Hz, 1H), 3.91 (s, 3H), 3.73 (d, *J* = 4.8 Hz, 2H), 2.85 (s, 1H), 1.53 (s, 3H); **<sup>13</sup>C NMR (100 MHz, CDCl<sub>3</sub>)**: δ 166.8, 135.8, 131.8, 131.3, 130.5, 129.2, 128.8, 127.4, 127.3, 121.5, 68.3, 52.2, 42.9, 21.8; **HRMS (ESI<sup>+</sup>) [M+H]<sup>+</sup>**: Calcd for C<sub>14</sub>H<sub>16</sub>O<sub>3</sub>N: 246.1125 m/z, found: 246.1127 m/z.

**(E)-3-(3-Cyano-3-methyl-4-(4,4,5,5-tetramethyl-1,3,2-dioxaborolan-2-yl)but-1-en-1-yl)-N-methoxy-N-methylbenzamide (7h)**. **IR (neat)**: 2977 (w), 2934 (w), 2235 (w), 1642 (m), 1601 (w), 1579 (w), 1362 (s), 1259 (w), 1218 (w), 1140 (s), 968 (m), 877 (w), 846 (m), 799 (s), 735 (m) cm<sup>-1</sup>; **<sup>1</sup>H NMR (400 MHz, CDCl<sub>3</sub>)**: δ 7.66 (s, 1H), 7.53 (d, *J* = 7.6 Hz, 1H), 7.42 (d, *J* = 7.6 Hz, 1H), 7.37-7.31 (m, 1H), 6.74 (d, *J* = 16.0 Hz, 1H), 6.18 (d, *J* = 16.0 Hz, 1H), 3.53 (s, 3H), 3.34 (s, 3H), 1.59 (s, 3H), 1.38 (s, 2H), 1.22 (s, 12H); **<sup>13</sup>C NMR (100 MHz, CDCl<sub>3</sub>)**: δ 169.5, 135.9, 134.4, 132.0, 128.6, 128.5, 128.3, 127.4, 126.1, 123.4, 83.7, 61.0, 36.2, 27.4, 24.7, 24.6; **HRMS (ESI<sup>+</sup>) [M+H]<sup>+</sup>**: Calcd for C<sub>21</sub>H<sub>30</sub>O<sub>4</sub>N<sub>2</sub>B: 384.2329 m/z, found: 384.2331 m/z.

**(E)-4-(2-Fluorophenyl)-2-methyl-2-((4,4,5,5-tetramethyl-1,3,2-dioxaborolan-2-yl)methyl)but-3-enenitrile (7i)**. **IR (neat)**: 2979 (w), 2934 (w), 2206 (w), 1488 (w), 1455 (w), 1365 (s), 1337 (m), 1260 (w), 1226 (m), 1141 (s), 1096 (m), 969 (m), 846 (m), 799 (m), 757 (s) cm<sup>-1</sup>; **<sup>1</sup>H NMR (400 MHz, CDCl<sub>3</sub>)**: δ 7.42-7.37 (m, 1H), 7.25-7.19 (m, 1H), 7.12-7.07 (m, 1H), 7.06-7.00 (m, 1H), 6.86 (d, *J* = 16.0 Hz, 1H), 6.28 (d, *J* = 16.0 Hz, 1H), 1.62 (s, 3H), 1.41 (s, 2H), 1.24 (s, 12H); **<sup>13</sup>C NMR (100 MHz, CDCl<sub>3</sub>)**: δ 160.3 (d, *J* = 248.9 Hz), 133.7 (d, *J* = 6.0 Hz), 129.2 (d, *J* = 8.4 Hz), 127.9 (d, *J* = 3.7 Hz), 124.1 (d, *J* = 3.6 Hz), 123.8 (d, *J* = 12.0 Hz), 123.4, 122.4 (d, *J* = 3.0 Hz), 115.8 (d, *J* = 22.0 Hz), 83.7, 36.5, 27.3, 24.7, 24.6; **<sup>19</sup>F NMR (376 MHz, CDCl<sub>3</sub>)**: δ -117.0; **HRMS (ESI<sup>+</sup>) [M+NH<sub>4</sub>]<sup>+</sup>**: Calcd for C<sub>18</sub>H<sub>27</sub>O<sub>2</sub>N<sub>2</sub>BF: 332.2180 m/z, found: 332.2181 m/z.



**(E)-2-(Hydroxymethyl)-4-(2-methoxyphenyl)-2-methylbut-3-enitrile (7j).** IR (neat): 3433 (br), 2938 (w), 2878 (w), 2838 (w), 2241 (w), 1644 (w), 1489 (m), 1462 (m), 1438 (w), 1293 (w), 1244 (s), 1180 (w), 1051 (s), 1025 (m), 971 (m), 752 (s)  $\text{cm}^{-1}$ ;  $^1\text{H NMR}$  (400 MHz,  $\text{CDCl}_3$ ):  $\delta$  7.39 (dd,  $J = 7.6, 1.2$  Hz, 1H), 7.29-7.23 (m, 1H), 7.14 (d,  $J = 16.0$  Hz, 1H), 6.95-6.90 (m, 1H), 6.88 (d,  $J = 8.4$  Hz, 1H), 6.03 (d,  $J = 16.0$  Hz, 1H), 3.85 (s, 3H), 3.70 (d,  $J = 2.8$  Hz, 2H), 2.66 (s, 1H), 1.53 (s, 3H);  $^{13}\text{C NMR}$  (100 MHz,  $\text{CDCl}_3$ ):  $\delta$  156.9, 129.4, 128.1, 127.3, 126.5, 124.3, 121.8, 120.5, 110.8, 68.5, 55.3, 43.0, 21.8; HRMS (ESI<sup>+</sup>) [ $\text{M}+\text{H}$ ]<sup>+</sup>: Calcd for  $\text{C}_{13}\text{H}_{16}\text{O}_2\text{N}$ : 218.1176 m/z, found: 218.1177 m/z.

**(E)-2-Methyl-2-((4,4,5,5-tetramethyl-1,3,2-dioxaborolan-2-yl)methyl)-4-(o-tolyl)but-3-enitrile (7k).** IR (neat): 2965 (w), 2142 (w), 1459 (w), 1365 (w), 1336 (w), 1260 (m), 1218 (w), 1140 (w), 1091 (m), 969 (w), 846 (w), 798 (s), 751 (w)  $\text{cm}^{-1}$ ;  $^1\text{H NMR}$  (400 MHz,  $\text{CDCl}_3$ ):  $\delta$  7.41-7.36 (m, 1H), 7.21-7.13 (m, 3H), 6.99 (d,  $J = 16.0$  Hz, 1H), 6.03 (d,  $J = 16.0$  Hz, 1H), 2.38 (s, 3H), 1.63 (s, 3H), 1.43 (s, 2H), 1.26 (s, 12H);  $^{13}\text{C NMR}$  (100 MHz,  $\text{CDCl}_3$ ):  $\delta$  135.8, 135.2, 132.6, 130.3, 127.7, 127.3, 126.0, 125.8, 123.6, 83.7, 36.4, 27.6, 24.8, 24.7, 19.7; HRMS (ESI<sup>+</sup>) [ $\text{M}+\text{NH}_4$ ]<sup>+</sup>: Calcd for  $\text{C}_{19}\text{H}_{30}\text{O}_2\text{N}_2\text{B}$ : 328.2431 m/z, found: 328.2433 m/z.

**(E)-2-Methyl-4-(naphthalen-2-yl)-2-((4,4,5,5-tetramethyl-1,3,2-dioxaborolan-2-yl)methyl)but-3-enitrile (7l).** IR (neat): 2978 (w), 2926 (w), 2238 (w), 1465 (w), 1447 (w), 1364 (s), 1322 (s), 1213 (m), 1142 (s), 1101 (w), 1042 (w), 965 (s), 846 (m), 816 (s), 745 (s)  $\text{cm}^{-1}$ ;  $^1\text{H NMR}$  (400 MHz,  $\text{CDCl}_3$ ):  $\delta$  7.84-7.78 (m, 3H), 7.76 (s, 1H), 7.57 (dd,  $J = 8.8, 1.6$  Hz, 1H), 7.51-7.43 (m, 2H), 6.93 (d,  $J = 16.0$  Hz, 1H), 6.29 (d,  $J = 16.0$  Hz, 1H), 1.66 (s, 3H), 1.47 (s, 2H), 1.26 (s, 12H);  $^{13}\text{C NMR}$  (100 MHz,  $\text{CDCl}_3$ ):  $\delta$  133.5, 133.4, 133.0, 131.3, 129.5, 128.3, 128.0, 127.6, 126.8, 126.3, 126.0, 123.6, 123.4, 83.8, 36.4, 27.6, 24.8, 24.7; HRMS (ESI<sup>+</sup>) [ $\text{M}+\text{NH}_4$ ]<sup>+</sup>: Calcd for  $\text{C}_{22}\text{H}_{30}\text{O}_2\text{N}_2\text{B}$ : 364.2431 m/z, found: 364.2435 m/z.

**(E)-5-Hydroxy-2-methyl-2-phenylpent-3-enitrile (8a).** IR (neat): 3410 (br), 2927 (w), 2857 (w), 2239 (w), 1663 (w), 1600 (w), 1492 (w), 1448 (m), 1310 (w), 1088 (m), 1017 (m), 969 (s), 763 (s), 696 (s), 519 (m)  $\text{cm}^{-1}$ ;  $^1\text{H NMR}$  (400 MHz,  $\text{CDCl}_3$ ):  $\delta$  7.48-7.42 (m, 2H), 7.42-7.35 (m, 2H), 7.35-7.29 (m, 1H), 6.08 (dt,  $J = 15.6, 4.8$  Hz, 1H), 5.86 (d,  $J = 15.6$  Hz, 1H), 4.23 (d,  $J = 3.6$  Hz, 2H), 1.83 (s, 3H), 1.66 (s, 1H);  $^{13}\text{C NMR}$  (100 MHz,  $\text{CDCl}_3$ ):  $\delta$  139.6, 131.1, 130.4, 129.0, 128.0, 125.8, 122.0, 62.3, 43.5, 27.1; HRMS (ESI<sup>+</sup>) [ $\text{M}+\text{H}$ ]<sup>+</sup>: Calcd for  $\text{C}_{12}\text{H}_{14}\text{ON}$ : 188.1070 m/z, found: 188.1070 m/z.

**(E)-5-Hydroxy-2-(4-methoxyphenyl)-2-methylpent-3-enitrile (8b).** IR (neat): 3424 (br), 2931 (w), 2841 (w), 2238 (w), 1608 (w), 1509 (s), 1455 (m), 1302 (m), 1250 (s), 1181 (m), 1090 (w), 1023 (s), 970 (m), 830 (s), 539 (m)  $\text{cm}^{-1}$ ;  $^1\text{H NMR}$  (400 MHz,  $\text{CDCl}_3$ ):  $\delta$  7.34 (d,  $J = 8.8$  Hz, 2H), 6.89 (d,  $J = 8.8$  Hz, 2H), 6.04 (dt,  $J = 15.6, 4.8$  Hz, 1H), 5.82 (d,  $J = 15.6$  Hz, 1H), 4.24-4.18 (m, 2H), 3.80 (s, 3H), 1.82 (s, 1H), 1.79 (s, 3H);  $^{13}\text{C NMR}$  (100 MHz,  $\text{CDCl}_3$ ):  $\delta$  159.2, 131.5, 131.4, 130.1, 127.1, 122.2, 114.2, 62.2, 55.3, 42.7, 27.1; HRMS (ESI<sup>+</sup>) [ $\text{M}+\text{NH}_4$ ]<sup>+</sup>: Calcd for  $\text{C}_{13}\text{H}_{19}\text{O}_2\text{N}_2$ : 235.1441 m/z, found: 235.1441 m/z.

**(E)-5-Hydroxy-2-methyl-2-(3-(trifluoromethyl)phenyl)pent-3-enitrile (8c).** IR (neat): 3412 (br), 2990 (w), 2935 (w), 2871 (w), 2243 (w), 1442 (w), 1381 (w), 1325 (s), 1166 (m), 1123 (s), 1073 (m), 1014 (w), 803 (m), 697 (m), 527 (w)  $\text{cm}^{-1}$ ;  $^1\text{H NMR}$  (400 MHz,  $\text{CDCl}_3$ ):  $\delta$  7.70-7.65 (m, 2H), 7.60 (d,  $J = 7.6$  Hz, 1H), 7.56-7.50 (m, 1H), 6.12 (dt,  $J = 15.6, 4.8$  Hz, 1H), 5.87 (d,  $J = 15.6$  Hz, 1H), 4.29-4.23 (m, 2H), 1.86 (s, 3H);  $^{13}\text{C NMR}$  (100 MHz,  $\text{CDCl}_3$ ):  $\delta$  140.8, 131.5 (q,  $J = 32.5$  Hz), 131.4, 130.0, 129.6, 129.5, 125.1 (q,  $J = 3.7$  Hz), 123.7 (q,  $J = 270.8$  Hz), 122.6 (q,  $J = 3.9$  Hz), 121.4, 62.1, 43.4, 27.1;  $^{19}\text{F NMR}$  (376 MHz,  $\text{CDCl}_3$ ):  $\delta$  -62.6; HRMS (ESI<sup>+</sup>) [M+H]<sup>+</sup>: Calcd for  $\text{C}_{13}\text{H}_{13}\text{ONF}_3$ : 256.0944 m/z, found: 256.0944 m/z.

**(E)-2-(3-Chlorophenyl)-5-hydroxy-2-methylpent-3-enitrile (8d).** IR (neat): 3415 (br), 2986 (w), 2928 (w), 2864 (w), 2241 (w), 1585 (m), 1470 (m), 1416 (m), 1205 (w), 1085 (m), 969 (s), 879 (m), 785 (s), 690 (s), 441 (w)  $\text{cm}^{-1}$ ;  $^1\text{H NMR}$  (400 MHz,  $\text{CDCl}_3$ ):  $\delta$  7.43-7.39 (m, 1H), 7.37-7.29 (m, 3H), 6.09 (dt,  $J = 15.6, 4.8$  Hz, 1H), 5.84 (dt,  $J = 15.6, 1.6$  Hz, 1H), 4.28-4.23 (m, 2H), 1.82 (s, 3H);  $^{13}\text{C NMR}$  (100 MHz,  $\text{CDCl}_3$ ):  $\delta$  141.6, 135.0, 131.1, 130.3, 130.2, 128.4, 126.2, 124.2, 121.5, 62.2, 43.3, 27.1; HRMS (ESI<sup>+</sup>) [M+H]<sup>+</sup>: Calcd for  $\text{C}_{12}\text{H}_{13}\text{ONCl}$ : 222.0680 m/z, found: 222.0680 m/z.

**(E)-5-Hydroxy-2-methyl-2-(o-tolyl)pent-3-enitrile (8e).** IR (neat): 3406 (br), 2984 (w), 2930 (w), 2867 (w), 2237 (w), 1454 (m), 1378 (w), 1222 (w), 1085 (m), 1020 (m), 970 (s), 763 (s), 727 (s), 544 (w), 454 (m)  $\text{cm}^{-1}$ ;  $^1\text{H NMR}$  (400 MHz,  $\text{CDCl}_3$ ):  $\delta$  7.44-7.40 (m, 1H), 7.36-7.26 (m, 3H), 6.07 (dt,  $J = 15.6, 4.8$  Hz, 1H), 5.82 (d,  $J = 15.6$  Hz, 1H), 4.27 (d,  $J = 4.8$  Hz, 2H), 2.58 (s, 3H), 2.10 (s, 1H), 1.97 (s, 3H);  $^{13}\text{C NMR}$  (100 MHz,  $\text{CDCl}_3$ ):  $\delta$  137.1, 135.8, 132.5, 130.7, 130.6, 128.4, 126.4, 125.5, 121.9, 62.1, 41.7, 27.0, 21.0; HRMS (ESI<sup>+</sup>) [M+NH<sub>4</sub>]<sup>+</sup>: Calcd for  $\text{C}_{13}\text{H}_{19}\text{ON}_2$ : 219.1492 m/z, found: 219.1492 m/z.

**(E)-2-(Benzofuran-2-yl)-5-hydroxy-2-methylpent-3-enitrile (8f).** IR (neat): 3418 (br), 2930 (w), 2867 (w), 2238 (w), 1585 (w), 1451 (m), 1306 (w), 1251 (m), 1166 (m), 1080 (m), 1012 (m), 969 (m), 810 (m), 746 (s)  $\text{cm}^{-1}$ ;  $^1\text{H NMR}$  (400 MHz,  $\text{CDCl}_3$ ):  $\delta$  7.55 (d,  $J = 7.6$  Hz, 1H), 7.47 (d,  $J = 7.6$  Hz, 1H), 7.34-7.28 (m, 1H), 7.27-7.22 (m, 1H), 6.71 (d,  $J = 0.8$  Hz, 1H), 6.20 (dt,  $J = 15.6, 4.8$  Hz, 1H), 5.92 (dt,  $J = 15.6, 1.6$  Hz, 1H), 4.26 (d,  $J = 4.4$  Hz, 2H), 1.90 (s, 3H), 1.87 (s, 1H);  $^{13}\text{C NMR}$  (100 MHz,  $\text{CDCl}_3$ ):  $\delta$  155.1, 153.9, 132.1, 127.5, 127.4, 124.8, 123.2, 121.2, 119.7, 111.4, 103.6, 62.0, 39.8, 25.1; HRMS (ESI<sup>+</sup>) [M+H]<sup>+</sup>: Calcd for  $\text{C}_{14}\text{H}_{14}\text{O}_2\text{N}$ : 228.1019 m/z, found: 228.1019 m/z.

**(E)-2-(Benzo[b]thiophen-2-yl)-5-hydroxy-2-methylpent-3-enitrile (8g).** IR (neat): 3409 (br), 2925 (w), 2862 (w), 2232 (w), 1661 (w), 1443 (m), 1304 (w), 1161 (w), 1071 (w), 1009 (m), 966 (m), 829 (m), 748 (s), 435 (w)  $\text{cm}^{-1}$ ;  $^1\text{H NMR}$  (400 MHz,  $\text{CDCl}_3$ ):  $\delta$  7.78 (d,  $J = 7.6$  Hz, 1H), 7.73 (d,  $J = 7.6$  Hz, 1H), 7.39-7.30 (m, 3H), 6.19 (dt,  $J = 15.6, 4.8$  Hz, 1H), 5.93 (dt,  $J = 15.4, 1.6$  Hz, 1H), 4.25 (d,  $J = 3.6$  Hz, 2H), 1.99 (s, 1H), 1.94 (s, 3H);  $^{13}\text{C NMR}$  (100 MHz,  $\text{CDCl}_3$ ):  $\delta$  144.1, 139.4, 139.0, 131.3, 129.9,

124.9, 124.7, 123.8, 122.3, 121.9, 120.8, 62.0, 41.2, 28.1; **HRMS (ESI<sup>+</sup>) [M+H]<sup>+</sup>**: Calcd for C<sub>14</sub>H<sub>14</sub>ONS: 224.0791 m/z, found: 224.0790 m/z.

**(E)-Tert-butyl 3-(2-cyano-5-hydroxypent-3-en-2-yl)-1H-indole-1-carboxylate (8h).** **IR (neat):** 3436 (br), 2981 (w), 2933 (w), 2864 (w), 2240 (w), 1731 (s), 1452 (m), 1368 (s), 1245 (m), 1150 (s), 1106 (m), 1022 (w), 849 (m), 743 (s), 472 (w) cm<sup>-1</sup>; **<sup>1</sup>H NMR (400 MHz, CDCl<sub>3</sub>):** δ 8.15 (d, *J* = 8.0 Hz, 1H), 7.69 (d, *J* = 8.0 Hz, 1H), 7.58 (s, 1H), 7.37-7.30 (m, 1H), 7.28-7.21 (m, 1H), 6.13 (dt, *J* = 15.2, 4.8 Hz, 1H), 5.86 (d, *J* = 15.2 Hz, 1H), 4.16 (d, *J* = 3.2 Hz, 2H), 2.69 (s, 1H), 1.90 (s, 3H), 1.67 (s, 9H); **<sup>13</sup>C NMR (100 MHz, CDCl<sub>3</sub>):** δ 149.3, 135.8, 131.3, 129.1, 127.1, 124.7, 122.7, 122.6, 121.1, 120.0, 119.0, 115.3, 84.3, 61.7, 37.3, 27.9, 25.8; **HRMS (ESI<sup>+</sup>) [M+H]<sup>+</sup>**: Calcd for C<sub>19</sub>H<sub>23</sub>O<sub>3</sub>N<sub>2</sub>: 327.1703 m/z, found: 327.1703 m/z.

**(E)-2-Cyclohexyl-5-hydroxy-2-methylpent-3-enitrile (8i).** **IR (neat):** 3427 (br), 2927 (s), 2855 (m), 2237 (w), 1665 (w), 1450 (m), 1375 (w), 1312 (w), 1269 (w), 1093 (m), 1015 (m), 971 (s), 893 (s), 803 (w), 516 (w) cm<sup>-1</sup>; **<sup>1</sup>H NMR (400 MHz, CDCl<sub>3</sub>):** δ 6.00 (dt, *J* = 15.6, 4.8 Hz, 1H), 5.49 (d, *J* = 15.6 Hz, 1H), 4.19 (d, *J* = 4.4 Hz, 2H), 1.93-1.62 (m, 6H), 1.43-1.31 (m, 4H), 1.28-1.00 (m, 5H); **<sup>13</sup>C NMR (100 MHz, CDCl<sub>3</sub>):** δ 130.5, 130.3, 122.1, 62.3, 45.5, 43.9, 28.3, 27.9, 26.1, 25.8, 23.5; **HRMS (ESI<sup>+</sup>) [M+NH<sub>4</sub>]<sup>+</sup>**: Calcd for C<sub>12</sub>H<sub>23</sub>ON<sub>2</sub>: 211.1805 m/z, found: 211.1805 m/z.

**(E)-2-(3-Hydroxyprop-1-en-1-yl)-2,6-dimethylhept-5-enitrile (8j).** **IR (neat):** 3424 (br), 2972 (m), 2923 (m), 2861 (m), 2238 (w), 1668 (w), 1601 (w), 1448 (m), 1378 (m), 1212 (w), 1094 (m), 1018 (m), 970 (s), 831 (w), 752 (w), 541 (w) cm<sup>-1</sup>; **<sup>1</sup>H NMR (400 MHz, CDCl<sub>3</sub>):** δ 6.03 (d, *J* = 15.6, 4.8 Hz, 1H), 5.51 (d, *J* = 15.6 Hz, 1H), 5.06 (t, *J* = 6.4 Hz, 1H), 4.24-4.15 (m, 2H), 2.19-2.00 (m, 2H), 1.78-1.49 (m, 9H), 1.43 (s, 3H); **<sup>13</sup>C NMR (100 MHz, CDCl<sub>3</sub>):** δ 132.9, 130.7, 130.4, 122.5, 122.3, 62.2, 40.1, 39.3, 26.0, 25.6, 23.9, 17.6; **HRMS (ESI<sup>+</sup>) [M+H]<sup>+</sup>**: Calcd for C<sub>12</sub>H<sub>20</sub>ON: 194.1539 m/z, found: 194.1539 m/z.

**(E)-4-(3-Hydroxyprop-1-en-1-yl)chroman-4-carbonitrile (8k).** **IR (neat):** 3423 (br), 2929 (m), 2875 (m), 2238 (w), 1718 (w), 1580 (w), 1485 (m), 1449 (m), 1285 (w), 1258 (w), 1222 (s), 1096 (m), 1046 (m), 968 (m), 756 (s), 492 (w) cm<sup>-1</sup>; **<sup>1</sup>H NMR (400 MHz, CDCl<sub>3</sub>):** δ 7.26-7.17 (m, 2H), 6.97-6.88 (m, 1H), 6.85 (d, *J* = 8.0 Hz, 1H), 6.12 (dt, *J* = 15.2, 4.4 Hz, 1H), 5.71 (d, *J* = 15.2 Hz, 1H), 4.38-4.17 (m, 4H), 2.43-2.33 (m, 1H), 2.26-2.13 (m, 2H); **<sup>13</sup>C NMR (100 MHz, CDCl<sub>3</sub>):** δ 153.5, 133.2, 130.1, 129.4, 129.3, 121.2, 121.1, 118.6, 117.7, 62.2, 61.8, 39.6, 33.6; **HRMS (ESI<sup>+</sup>) [M+NH<sub>4</sub>]<sup>+</sup>**: Calcd for C<sub>13</sub>H<sub>17</sub>O<sub>2</sub>N<sub>2</sub>: 233.1285 m/z, found: 233.1285 m/z.

**(E)-5-Hydroxy-2-isopropyl-2-phenylpent-3-enitrile (8l).** **IR (neat):** 3416 (br), 2969 (m), 2929 (w), 2873 (w), 2241 (w), 1662 (w), 1598 (w), 1493 (w), 1456 (m), 1384 (w), 1092 (m), 1010 (m), 969 (m), 757 (m), 700 (s), 525 (m) cm<sup>-1</sup>; **<sup>1</sup>H NMR (400 MHz, CDCl<sub>3</sub>):** δ 7.46-7.41 (m, 2H), 7.40-7.34 (m, 2H), 7.32-7.27 (m, 1H), 6.11 (dt, *J* = 15.6, 4.8 Hz, 1H), 5.89 (d, *J* = 15.6 Hz, 1H), 4.24-4.13 (m, 2H), 2.34-2.23 (m, 1H), 1.75 (s, 1H), 1.11 (d, *J* = 6.8 Hz, 3H), 0.87 (d, *J* = 6.8 Hz, 3H); **<sup>13</sup>C NMR (100 MHz, CDCl<sub>3</sub>):**

$\delta$  139.0 131.1, 129.5, 128.9, 127.7, 125.9, 119.4, 62.2, 55.9, 37.1, 18.4, 18.3; **HRMS (ESI<sup>+</sup>) [M+NH<sub>4</sub>]<sup>+</sup>**: Calcd for C<sub>14</sub>H<sub>21</sub>ON<sub>2</sub>: 233.1648 m/z, found: 233.1648 m/z.

**(E)-2-(3-Hydroxyprop-1-en-1-yl)-2,6-dimethylhept-5-enal (9)**. **IR (neat)**: 3385 (br), 2970 (w), 2931 (w), 2874 (w), 1709 (m), 1451 (w), 1375 (m), 1310 (w), 1256 (w), 1225 (w), 1154 (w), 1022 (s), 980 (m), 802 (w), 583 (w) cm<sup>-1</sup>; **<sup>1</sup>H NMR (400 MHz, CDCl<sub>3</sub>)**:  $\delta$  9.31 (s, 1H), 5.71-5.56 (m, 2H), 5.01 (t,  $J = 5.6$  Hz, 1H), 4.10 (d,  $J = 3.2$  Hz, 2H), 2.57 (s, 1H), 1.96-1.75 (m, 2H), 1.66-1.48 (m, 8H), 1.14 (s, 3H); **<sup>13</sup>C NMR (100 MHz, CDCl<sub>3</sub>)**:  $\delta$  202.8, 132.3, 131.5, 131.1, 123.5, 63.1, 51.6, 35.7, 25.5, 22.5, 18.0, 17.5; **HRMS (ESI<sup>+</sup>) [M+NH<sub>4</sub>]<sup>+</sup>**: Calcd for C<sub>12</sub>H<sub>24</sub>O<sub>2</sub>N: 214.1802 m/z, found: 214.1801 m/z.

**Tert-butyl (4-(4-(dimethylamino)phenyl)-2-(hydroxymethyl)butyl)carbamate (10)**. **IR (neat)**: 3348 (br), 2972 (w), 2925 (w), 2878 (w), 2798 (w), 1682 (s), 1614 (w), 1515 (s), 1248 (m), 1163 (s), 1040 (w), 893 (w), 808 (s), 550 (w), 519 (w) cm<sup>-1</sup>; **<sup>1</sup>H NMR (400 MHz, CDCl<sub>3</sub>)**:  $\delta$  7.05 (d,  $J = 8.4$  Hz, 2H), 6.69 (d,  $J = 8.4$  Hz, 2H), 4.96 (t,  $J = 5.6$  Hz, 1H), 3.65-3.55 (m, 1H), 3.49-3.38 (m, 1H), 3.34-3.23 (m, 1H), 3.17-3.06 (m, 1H), 2.90 (s, 6H), 2.64-2.48 (m, 2H), 1.65-1.53 (m, 2H), 1.53-1.38 (m, 10H); **<sup>13</sup>C NMR (100 MHz, CDCl<sub>3</sub>)**:  $\delta$  157.4, 149.0, 130.2, 128.8, 113.0, 79.6, 62.2, 40.8, 40.7, 40.6, 32.1, 30.5, 28.3; **HRMS (ESI<sup>+</sup>) [M+H]<sup>+</sup>**: Calcd for C<sub>18</sub>H<sub>31</sub>O<sub>3</sub>N<sub>2</sub>: 323.2329 m/z, found: 323.2332 m/z.

**(E)-Tert-butyl(4-(3-chlorophenyl)-2-(hydroxymethyl)-3-methylbut-3-en-1-yl)carbamate (11)**. **IR (neat)**: 3352 (br), 2974 (w), 2929 (w), 2878 (w), 1685 (s), 1592 (w), 1510 (s), 1249 (m), 1164 (s), 1031 (m), 891 (w), 857 (w), 774 (m), 687 (m), 531 (w) cm<sup>-1</sup>; **<sup>1</sup>H NMR (400 MHz, CDCl<sub>3</sub>)**:  $\delta$  7.26-7.14 (m, 3H), 7.09 (d,  $J = 7.6$  Hz, 1H), 6.25 (s, 1H), 4.83 (s, 1H), 3.77-3.63 (m, 2H), 3.43-3.25 (m, 2H), 3.02 (s, 1H), 2.49-2.38 (m, 1H), 1.84 (s, 3H), 1.43 (s, 9H); **<sup>13</sup>C NMR (100 MHz, CDCl<sub>3</sub>)**:  $\delta$  156.8, 139.4, 138.4, 133.8, 129.3, 128.9, 127.1, 126.4, 79.8, 62.1, 51.4, 40.0, 28.3, 16.4; **HRMS (ESI<sup>+</sup>) [M+H]<sup>+</sup>**: Calcd for C<sub>17</sub>H<sub>25</sub>O<sub>3</sub>NCl: 326.1517 m/z, found: 326.1518 m/z.

**(E)-2-(Furan-2-ylmethyl)-2-methyl-4-phenylbut-3-enenitrile (12)**. **IR (neat)**: 3029 (w), 2982 (w), 2931 (w), 2237 (w), 1716 (w), 1498 (w), 1451 (w), 1205 (w), 1148 (w), 1076 (w), 1013 (m), 966 (m), 808 (w), 742 (s), 694 (m) cm<sup>-1</sup>; **<sup>1</sup>H NMR (400 MHz, CDCl<sub>3</sub>)**:  $\delta$  7.41-7.26 (m, 6H), 6.77 (d,  $J = 16.0$  Hz, 1H), 6.37-6.27 (m, 2H), 6.03 (d,  $J = 16.0$  Hz, 1H), 3.08 (s, 2H), 1.55 (s, 3H); **<sup>13</sup>C NMR (100 MHz, CDCl<sub>3</sub>)**:  $\delta$  149.6, 142.3, 135.8, 131.1, 128.7, 128.6, 128.2, 126.7, 122.2, 110.6, 109.2, 40.2, 39.0, 25.4; **HRMS (ESI<sup>+</sup>) [M+H]<sup>+</sup>**: Calcd for C<sub>16</sub>H<sub>16</sub>ON: 238.1226 m/z, found: 238.1225 m/z.

**(E)-2-Methyl-2-styrylpent-4-enenitrile (13)**. **IR (neat)**: 3074 (w), 3026 (w), 2980 (w), 2930 (w), 2236 (w), 1642 (w), 1599 (w), 1447 (m), 1295 (w), 965 (s), 922 (s), 747 (s), 691 (s), 604 (m), 564 (m) cm<sup>-1</sup>; **<sup>1</sup>H NMR (400 MHz, CDCl<sub>3</sub>)**:  $\delta$  7.46-7.26 (m, 5H), 6.80 (d,  $J = 16.0$  Hz, 1H), 5.99 (d,  $J = 16.0$  Hz, 1H), 5.94-5.80 (m, 1H), 5.31-5.20 (m, 2H), 2.48 (d,  $J = 7.2$  Hz, 2H), 1.54 (s, 3H); **<sup>13</sup>C NMR (100 MHz, CDCl<sub>3</sub>)**:  $\delta$  135.6, 131.5, 130.8, 128.8, 128.6, 128.0, 126.4, 122.1, 120.1, 44.5, 39.6, 25.3; **HRMS (ESI<sup>+</sup>) [M+H]<sup>+</sup>**: Calcd for C<sub>14</sub>H<sub>16</sub>N: 198.1277 m/z, found: 198.1276 m/z.

**4-(Hydroxymethyl)-2,2,9-trimethyl-5-methylene-3-oxodec-8-enenitrile(S1). IR (neat):** 3435 (br), 2965 (w), 2927 (w), 2239 (w), 1723 (s), 1641 (w), 1461 (w), 1382 (w), 1260 (w), 1087 (m), 1039 (s), 910 (w), 799 (m); **<sup>1</sup>H NMR (400 MHz, CDCl<sub>3</sub>):**  $\delta$  5.13-5.04 (m, 2H), 4.83 (s, 1H), 3.95-3.86 (m, 2H), 3.65 (d, J = 8.4 Hz, 1H), 2.37-2.13 (m, 4H), 2.00 (s, 1H), 1.68 (s, 3H), 1.61 (s, 3H), 1.52 (s, 3H), 1.50 (s, 3H); **<sup>13</sup>C NMR (100 MHz, CDCl<sub>3</sub>):**  $\delta$  204.2, 141.9, 132.4, 123.2, 121.9, 114.8, 63.1, 58.6, 43.9, 35.6, 25.9, 25.6, 24.9, 24.6, 17.7; **HRMS (ESI<sup>+</sup>) [M+H]<sup>+</sup>:** Calcd for C<sub>15</sub>H<sub>24</sub>NO<sub>2</sub>: 250.1802 m/z, found: 250.1802 m/z.

■ **Representative Experimental Procedure for Reduction of CN to Aldehyde.**

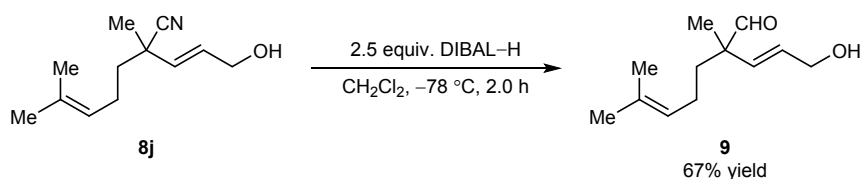

To a solution of **8j** (135.8 mg, 0.7 mmol) in DCM at  $-78\text{ }^\circ C$  was added DIBAL-H (1.75 mL, 1.75 mmol, 1.0 M in hexanes) dropwise. The reaction mixture was allowed to stir for 2.0 h and then quenched with a saturated aqueous solution of potassium sodium tartrate. The reaction mixture was diluted with Et<sub>2</sub>O. The layers were separated and the aqueous layer was washed with Et<sub>2</sub>O. The combined organic layers were dried over MgSO<sub>4</sub>, filtered and concentrated under vacuum. Purification by column chromatography on silica gel, gave the desired product **9** (91.7 mg, 67% yield) as colorless oil.

■ **Representative Experimental Procedure for Reduction of the Nitrile Moiety to the Protected Amines.**

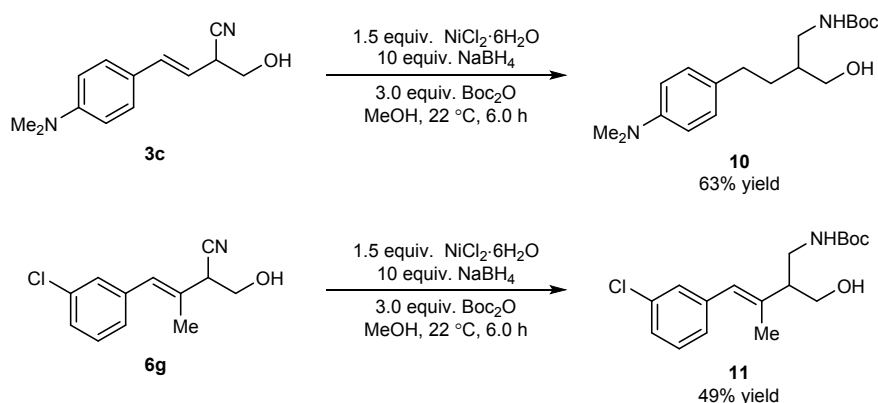

To a solution of **3c** (69.1 mg, 0.32 mmol), NiCl<sub>2</sub>·6H<sub>2</sub>O (114.1 mg, 0.48 mmol) and Boc<sub>2</sub>O (209.5 mg, 0.96 mmol) in MeOH at 0 °C was added NaBH<sub>4</sub> (121.1 mg, 3.20 mmol) portion. The mixture was allowed to stir for 6h at r.t. The reaction mixture was quenched with a saturated aqueous solution of NH<sub>4</sub>Cl, diluted with Et<sub>2</sub>O. The layers were separated and the aqueous layer was washed with Et<sub>2</sub>O. The combined organic

layers were dried over  $\text{MgSO}_4$ , filtered and concentrated under vacuum. Purification by column chromatography on silica gel, gave the desired product **10** (64.8 mg, 63% yield) as colorless oil.

■ **Representative Experimental Procedure for Functionalization of C-B(pin) bond to C-furan.**

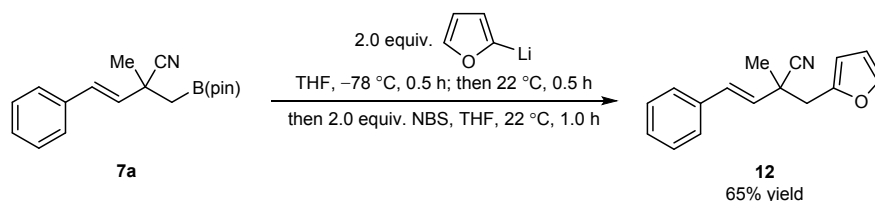

A solution of furan (73  $\mu\text{L}$ , 1.0 mmol) in THF was cooled to  $-78^\circ\text{C}$  and treated with *n*-BuLi (400  $\mu\text{L}$ , 1.0 mmol, 2.5 M in hexanes). The cooling bath was removed and the mixture was allowed to stir at room temperature for 1 h. The mixture was cooled to  $-78^\circ\text{C}$  and the boronic ester **7a** (149 mg, 0.5 mmol) was added dropwise as a solution in THF. The mixture was stirred at  $-78^\circ\text{C}$  for 1 h. Then a solution of *N*-bromosuccinimide (NBS, 178 mg, 1.0 mmol) in THF was added dropwise. After 1 h at  $-78^\circ\text{C}$ , a saturated aqueous solution of  $\text{Na}_2\text{S}_2\text{O}_3$  was added and the reaction mixture was allowed to warm to room temperature. The reaction mixture was diluted with  $\text{Et}_2\text{O}$  and water. The layers were separated and the aqueous layer was washed with  $\text{Et}_2\text{O}$ . The combined organic layers were dried over  $\text{MgSO}_4$ , filtered and concentrated under vacuum. Purification by column chromatography on silica gel, gave the desired product **12** (80.8 mg, 65% yield) as colorless oil.

■ **Representative Experimental Procedure for Functionalization of C-B(pin) bond to C-vinyl.**

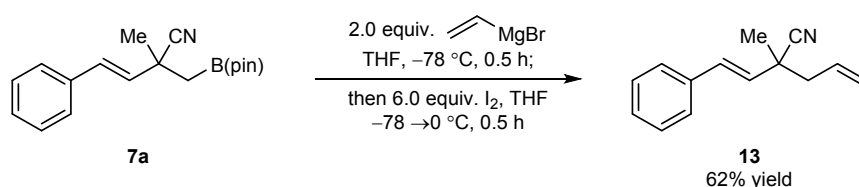

To a solution of boronic ester **7a** (161.4 mg, 0.54 mmol) in THF at  $-78^\circ\text{C}$  was added vinylmagnesium bromide (3.24 mL, 3.24 mmol, 1 M in THF) dropwise. The mixture was allowed to stir for 30 min at  $-78^\circ\text{C}$ . Then a solution of  $\text{I}_2$  (822.3 mg, 3.24 mmol) in MeOH was added dropwise, and the reaction mixture was allowed to stir for a further 30 min and then allowed to warm to  $0^\circ\text{C}$ . 5%  $\text{Na}_2\text{S}_2\text{O}_3$  was added and the solvents was removed from the reaction mixture in vacuo. The mixture was washed with  $\text{Et}_2\text{O}$ , the organic layers were combined, washed with brine, dried ( $\text{MgSO}_4$ ), concentrated and purified by column chromatography to give the desired product **13** (66.4 mg, 62%) as colorless oil.

■ **Representative Experimental Procedure for Equivalent Cu-B(pin) Addition to 1,3-dienes (s2).**

In a N<sub>2</sub>-filled glove-box, an oven-dried vial (8 mL, 61 × 16.6 mm) with a magnetic stir bar was charged with phosphine ligand **4h** (57.9 mg, 0.1 mmol, 1.0 equiv), CuCl (10 mg, 0.1 mmol, 1.0 equiv), LiO*t*-Bu (8.0 mg, 0.10 mmol, 1.0 equiv) and *d*8-tetrahydrofuran (*d*8-thf, 1 mL). The vessel was sealed with a cap (phenolic open top cap with red PTFE/white silicone septum) and the solution was allowed to stir at 22 °C for one hour. Bis(pinacolato)diboron (25.4 mg, 0.10 mmol, 1.0 equiv) was added to the solution, causing it to turn dark brown immediately. The vial was re-sealed with a cap (phenolic open top cap with red PTFE/white silicone septum). The mixture was allowed to stir at 22 °C for 20 min under an atmosphere of N<sub>2</sub>. Diene **s2** (20.9 mg, 0.10 mmol, 1.0 equiv) were added. The resulting solution was allowed to stir at 22 °C for 1 h. Then 1,35-trimethylbenzene (12.0mg, 0.1mmol) was added as internal standard. The reaction was monitored by <sup>1</sup>H NMR and 0.85 mmol diene **s2** remains with <5% conversion. The reason why such type of substrates was unreactive is that Cu–B(pin) addition did not occur.

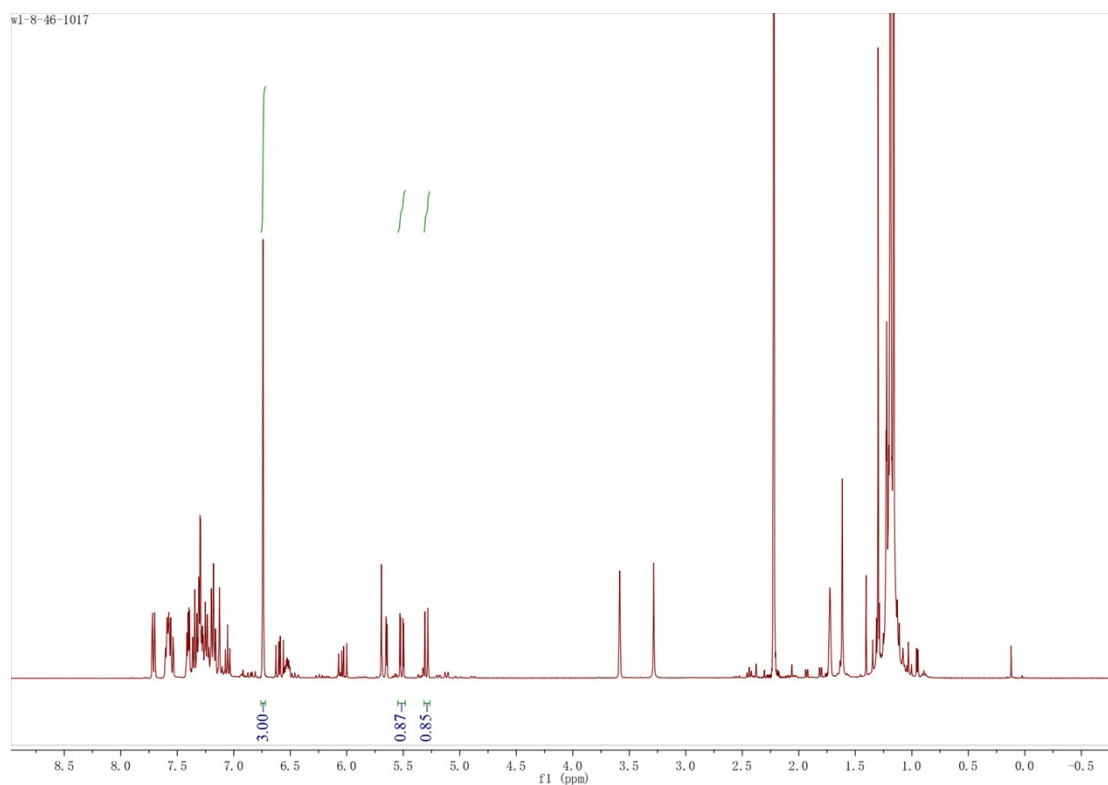

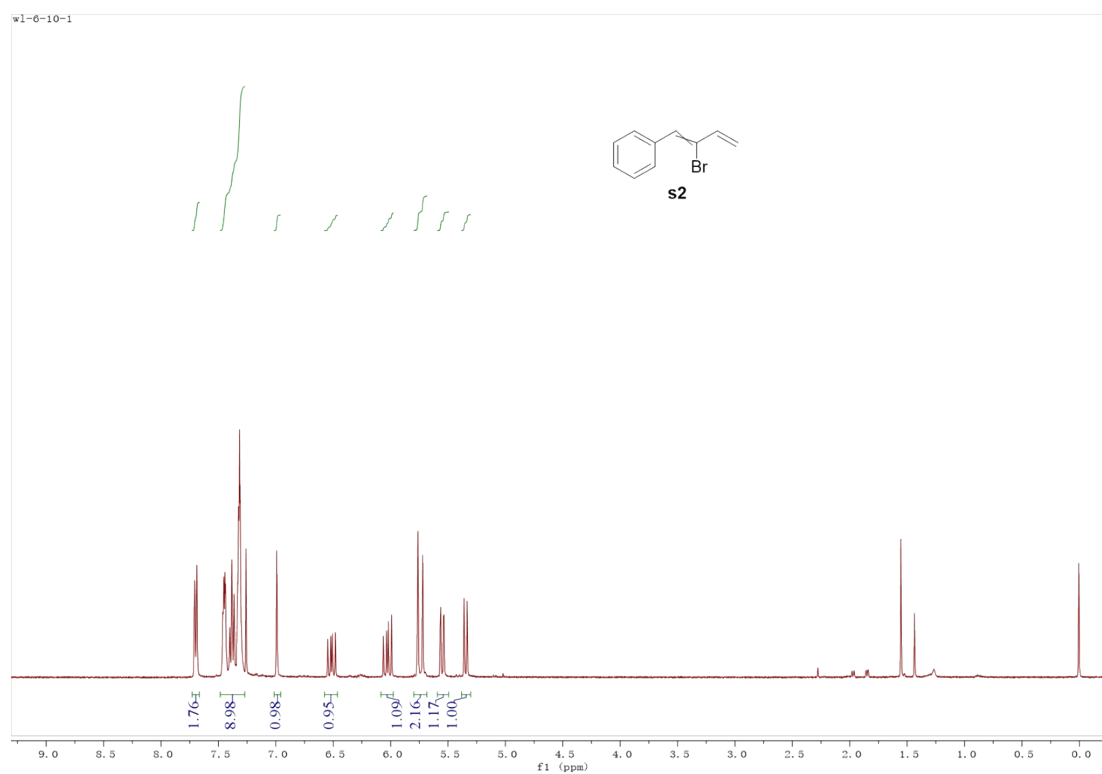

Table S1. Ligand Screen

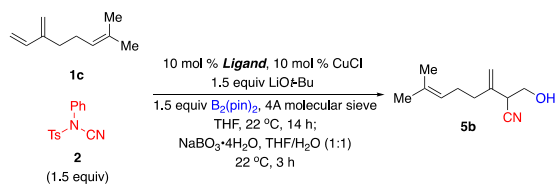

| Entry | Ligand | Yield (%) |
|-------|--------|-----------|
| 1     | 4a     | 55        |
| 2     | 4b     | 40        |
| 3     | 4c     | 51        |
| 4     | 4d     | 41        |
| 5     | 4e     | 66        |
| 6     | 4f     | 75        |
| 7     | 4g     | 27        |
| 8     | 4h     | 34        |

Table S2. Screen of Bases



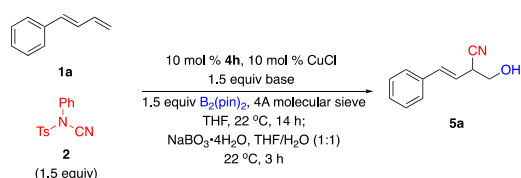

| Entry | base      | Yield (%) |
|-------|-----------|-----------|
| 1     | $K_2CO_3$ | 23        |
| 2     | $K_3PO_4$ | 15        |
| 3     | LiOt-Bu   | 75        |
| 4     | NaOt-Bu   | 36        |
| 5     | KOt-Bu    | 32        |

Screening of bases indicated that the reaction with LiOt-Bu provided highest yield. Low conversions of **1a** in the cases of reactions with  $K_2CO_3$  and  $K_3PO_4$  were observed, whereas stronger bases led to messy reactions, maybe due to decomposition of the product.

### Scheme S1. Reaction with DMMN

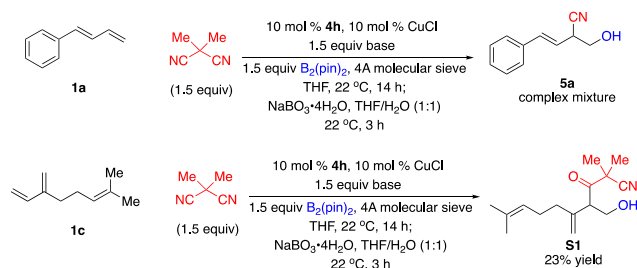

### Reference

- 1) H. E. Burks, L. T. Kliman, J. P. Morken, *J. Am. Chem. Soc.* **2009**, *131*, 9134.
- 2) P. Röse, S. Emge, J.-I. Yoshida, G. Hilt, *Beilstein J. Org. Chem.* **2015**, *11*, 174
- 3) H. Hioki, H. Ooi, M. Hamano, Y. Mimura, S. Yoshio, M. Kodama, S. Ohta, M. Yanaib, S. Ikegami, *Tetrahedron* **2001**, *57*, 1235.
- 4) T. Jiang, K. Huynh, T. Livinghouse, *Synlett* **2013**, *24*, 193.
- 5) J.-L. Shih, T. S. Nguyen, J. A. May, *Angew. Chem. Int. Ed.* **2015**, *54*, 9931; *Angew. Chem.* **2015**, *127*, 10069.
- 6) T.-J. Gong, B. Xiao, W.-M. Cheng, W. Su, J. Xu, Z.-J. Liu, L. Liu, Y. Fu, *J. Am. Chem. Soc.* **2013**, *135*, 10630.

## NMR Spectra

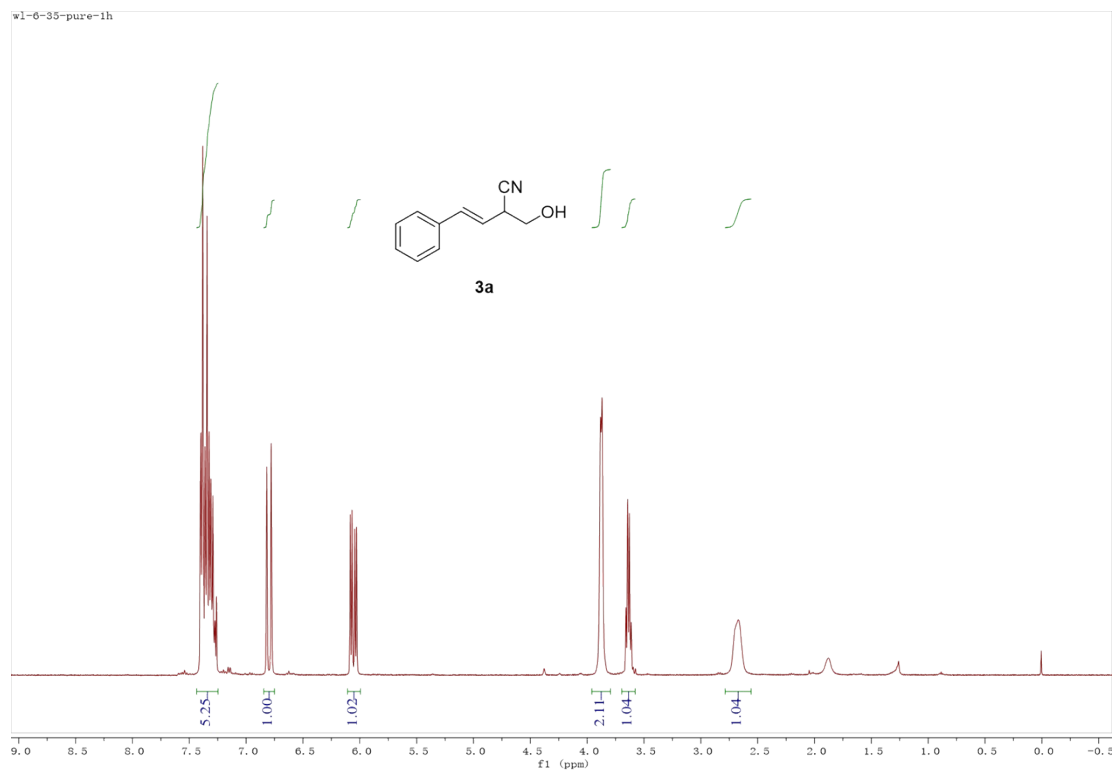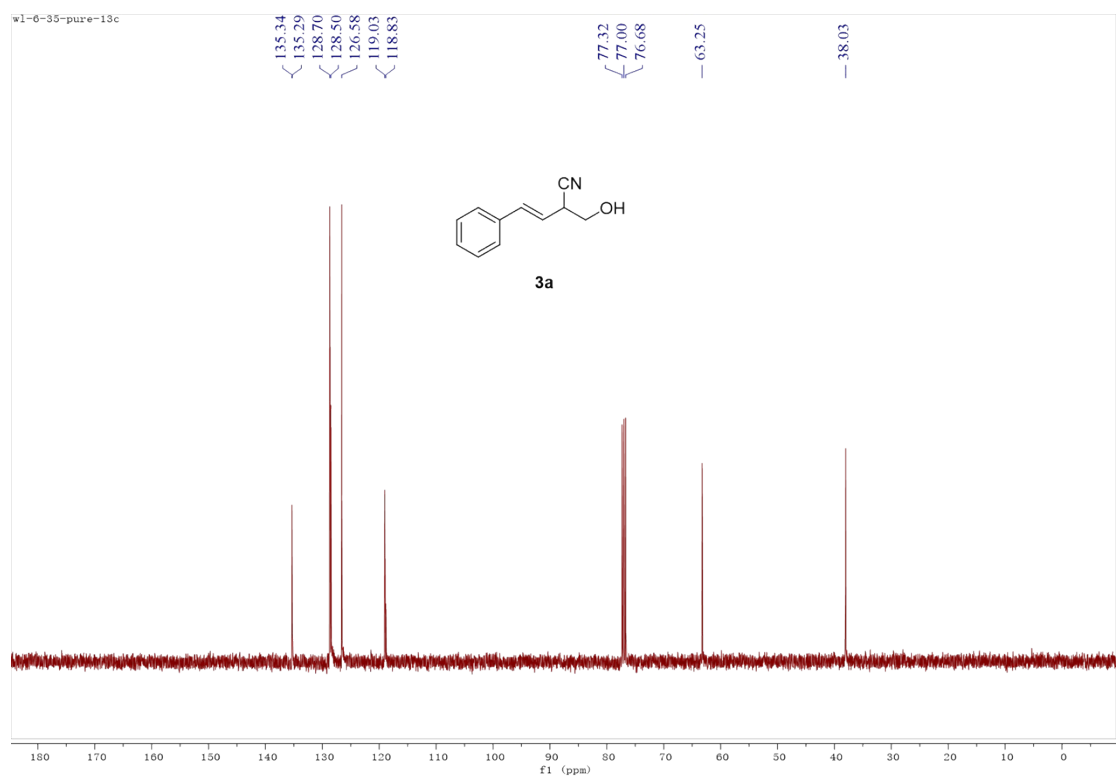

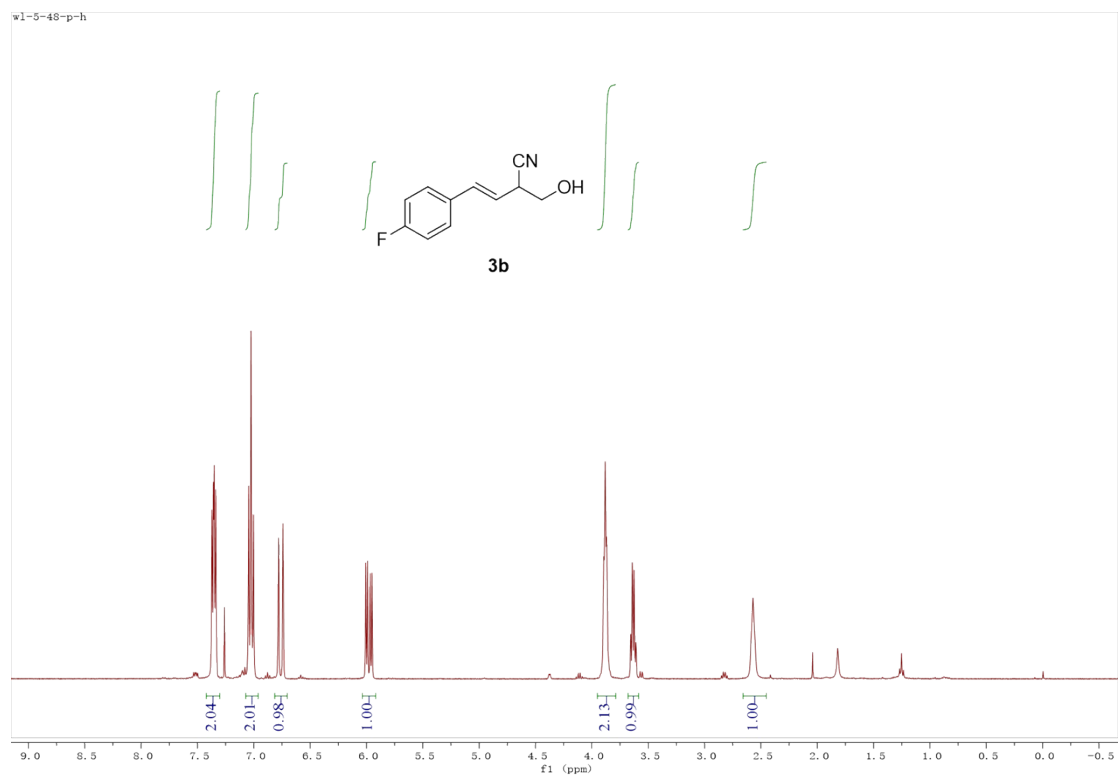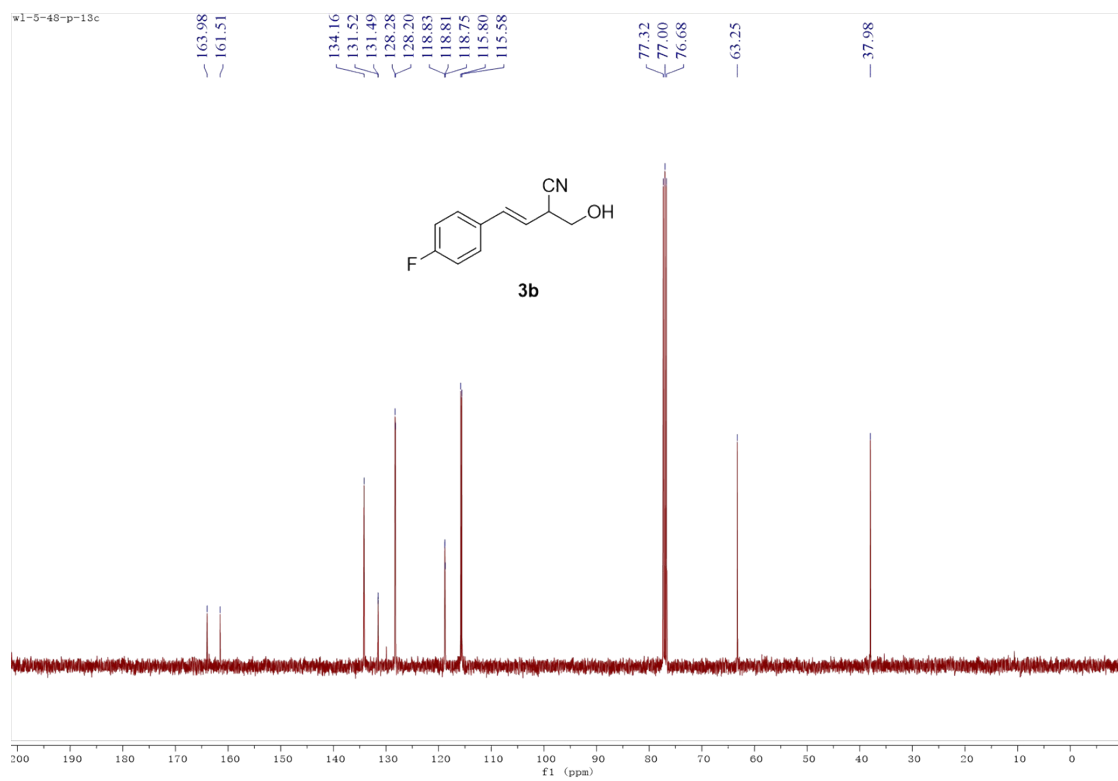

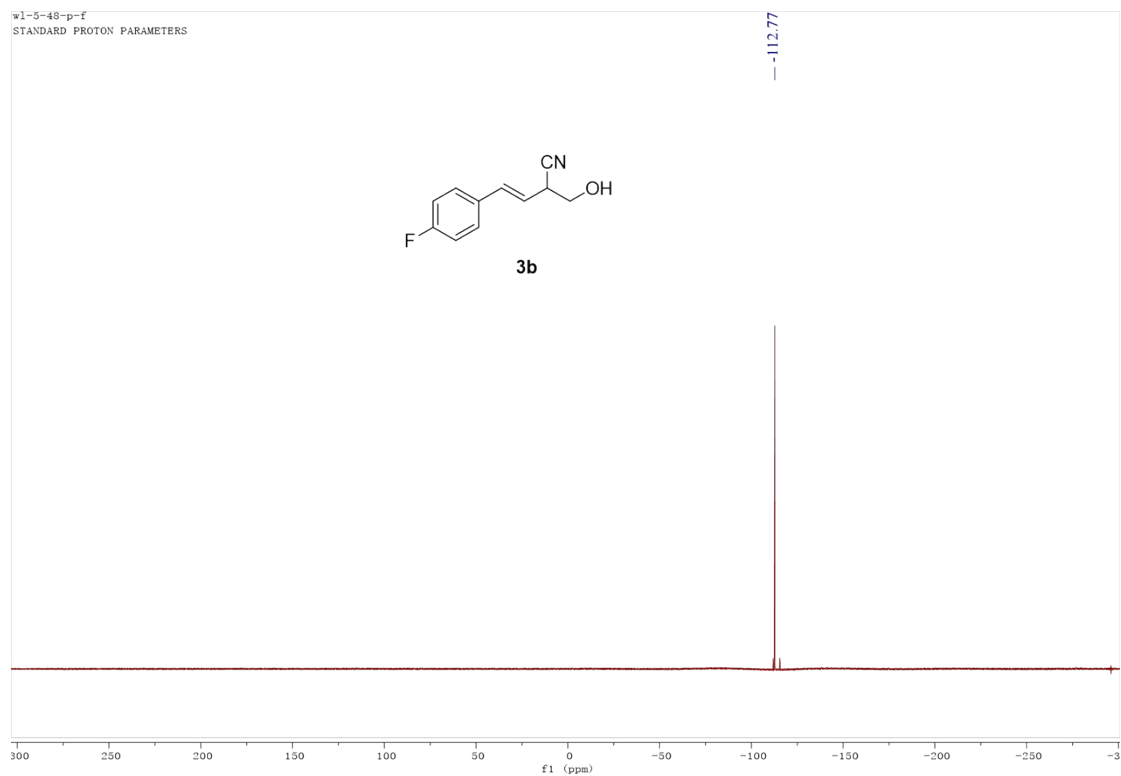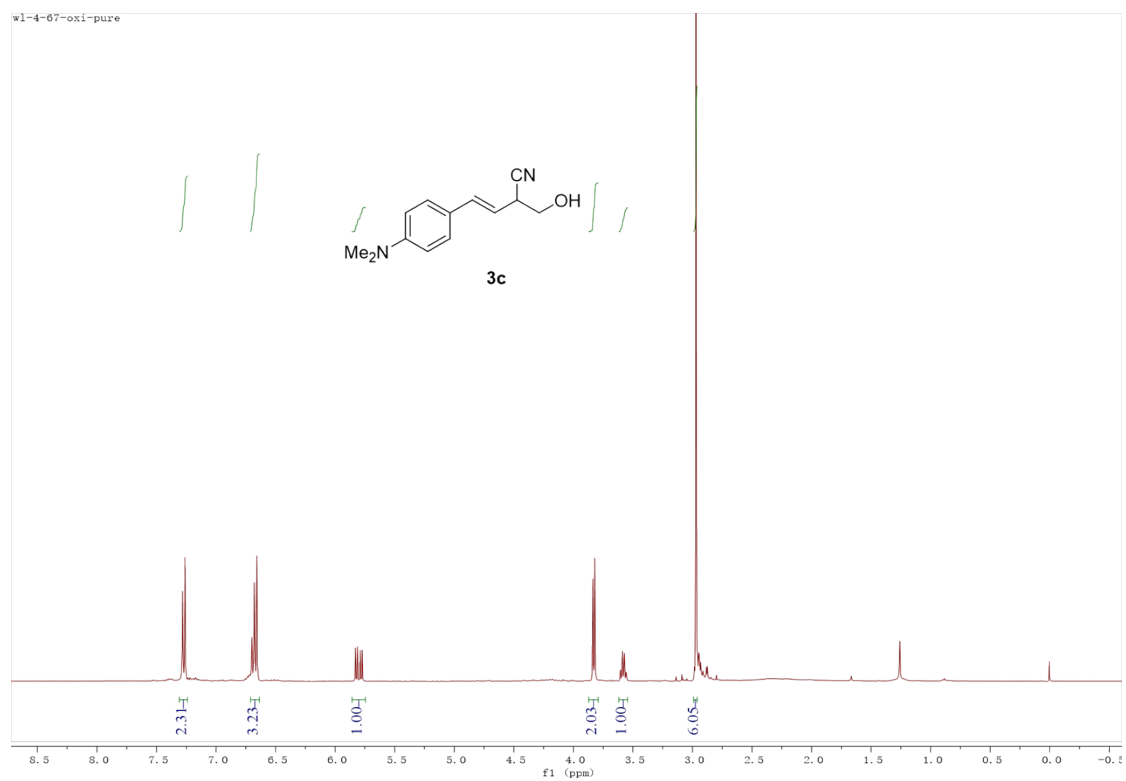

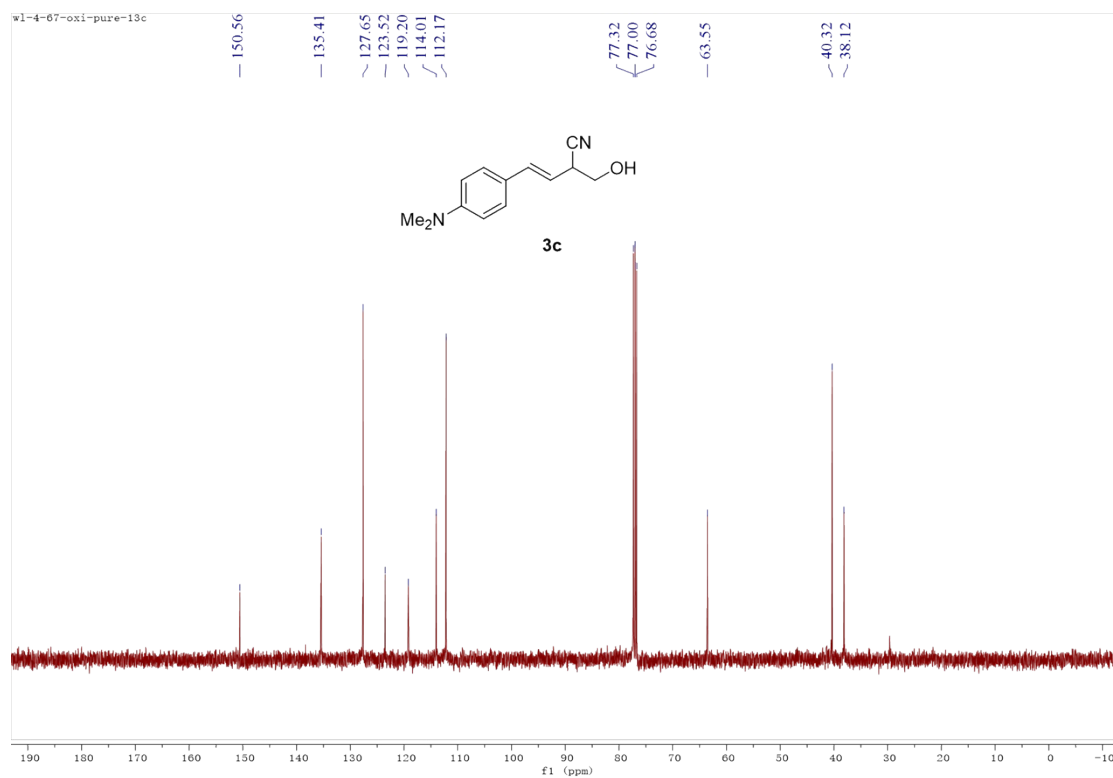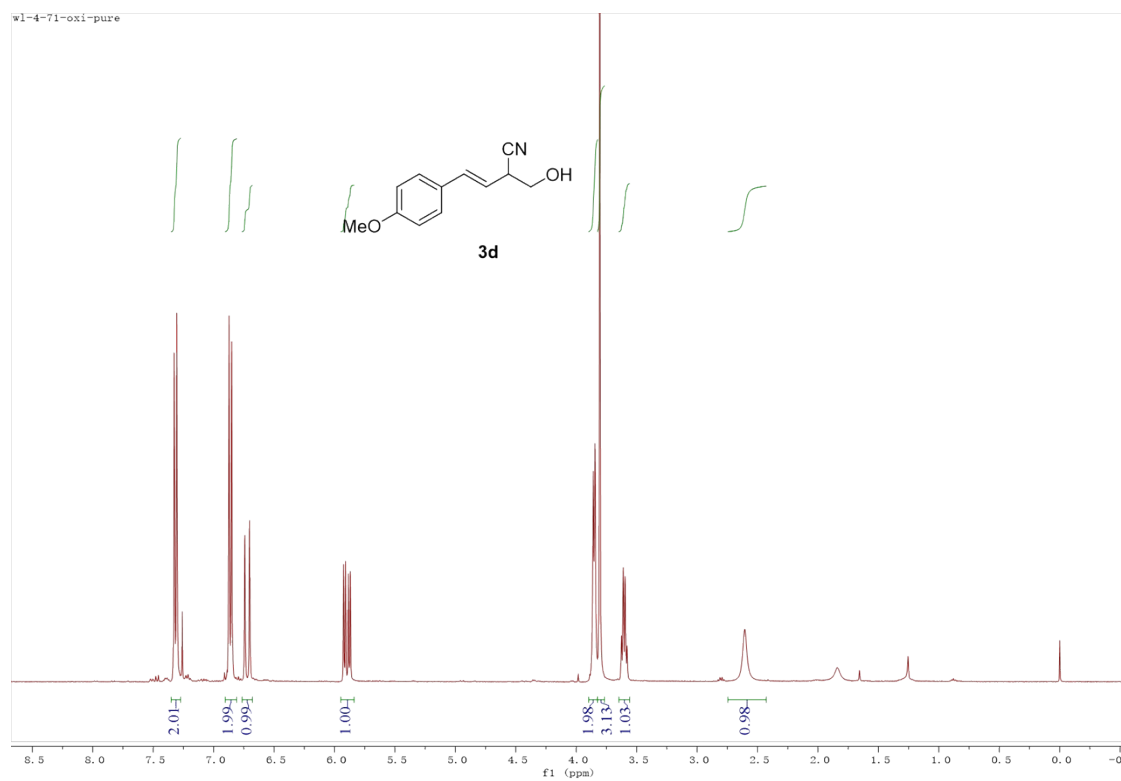

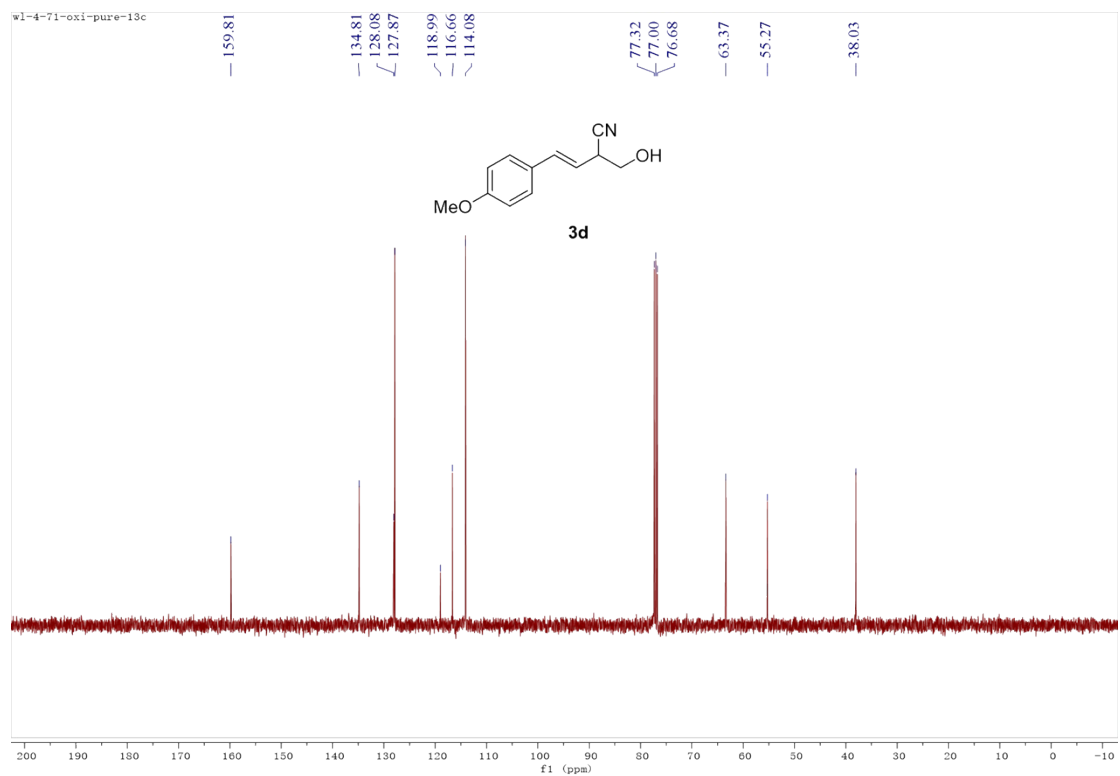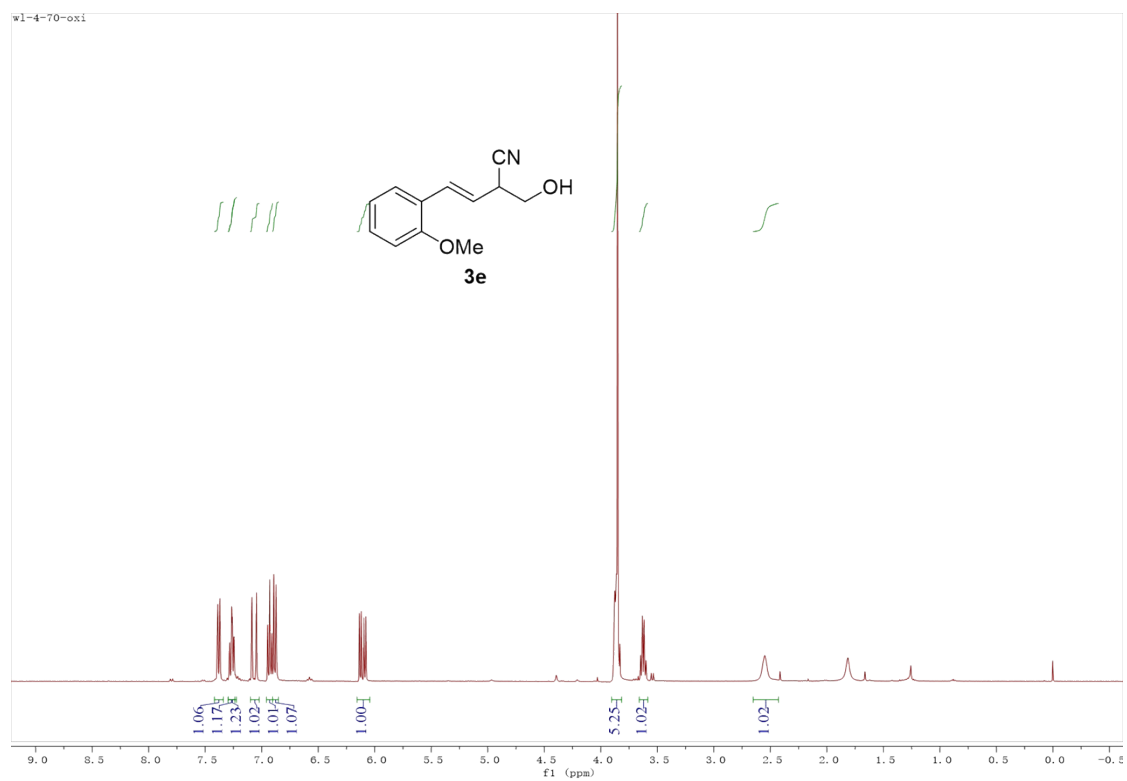

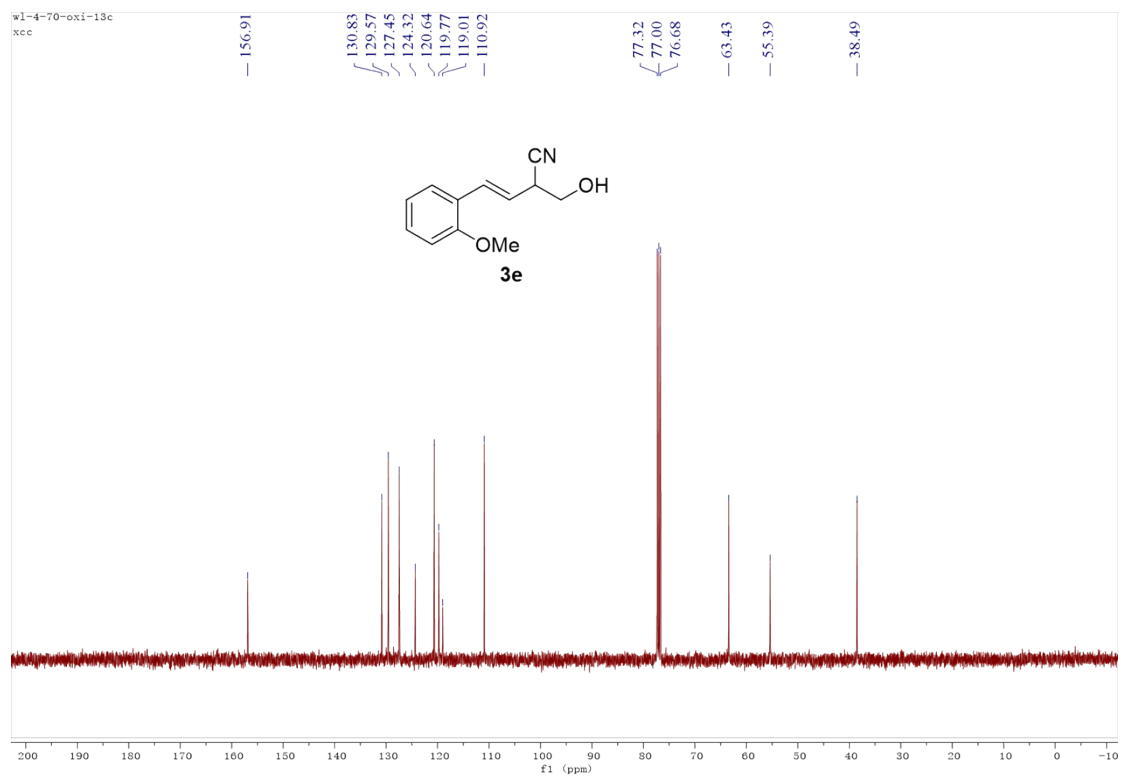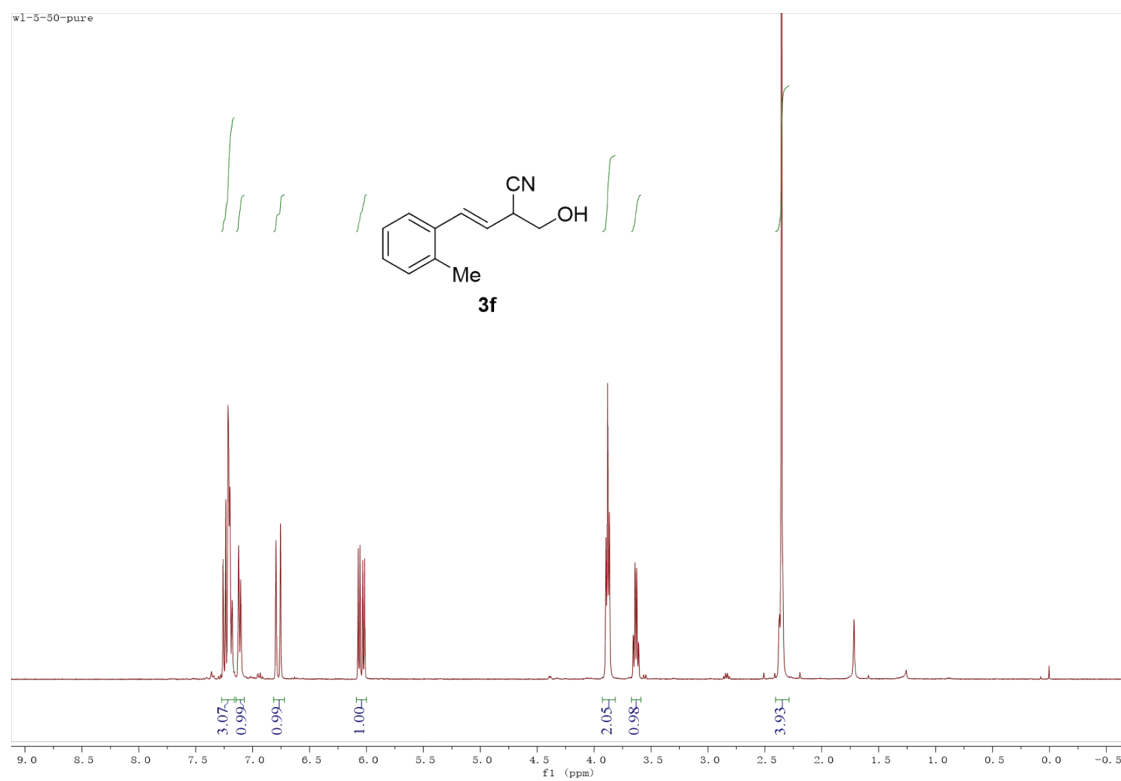

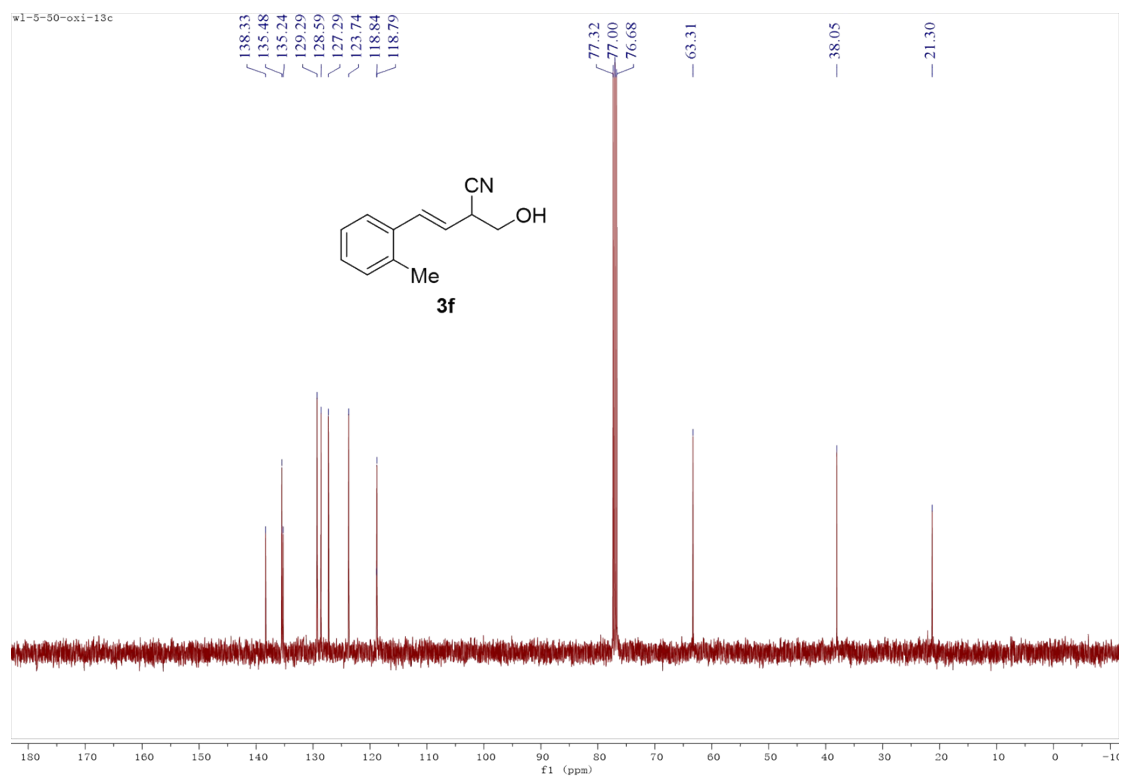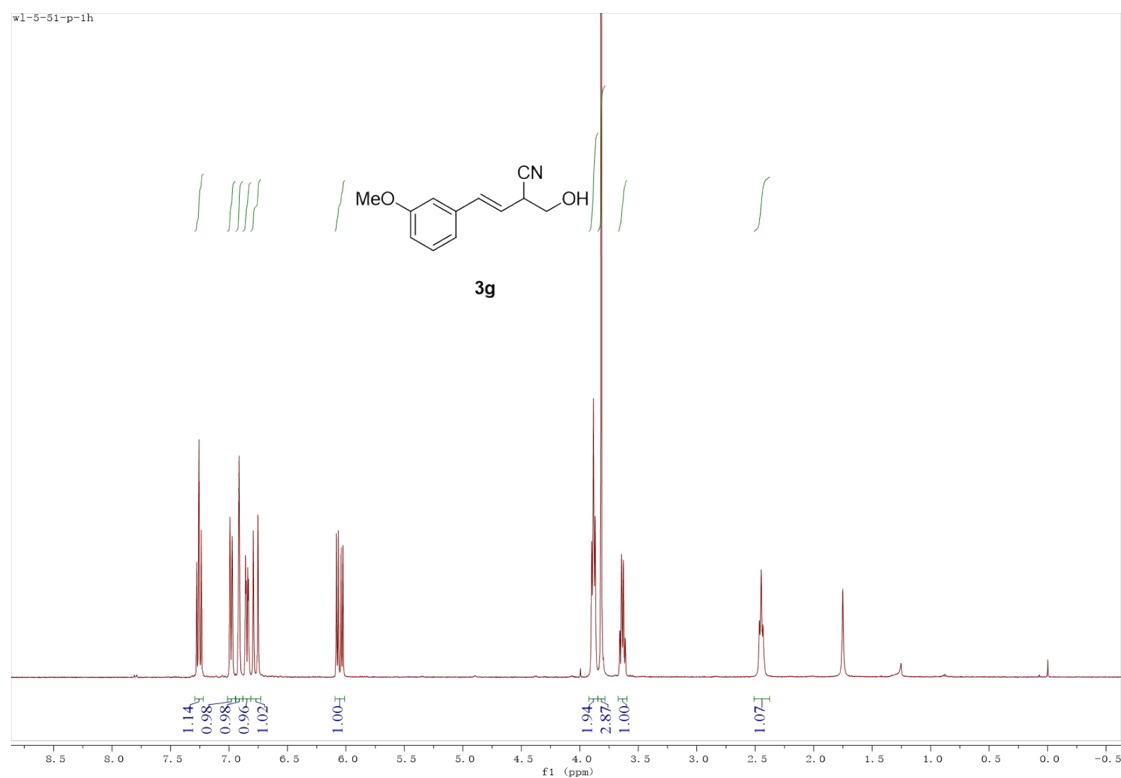



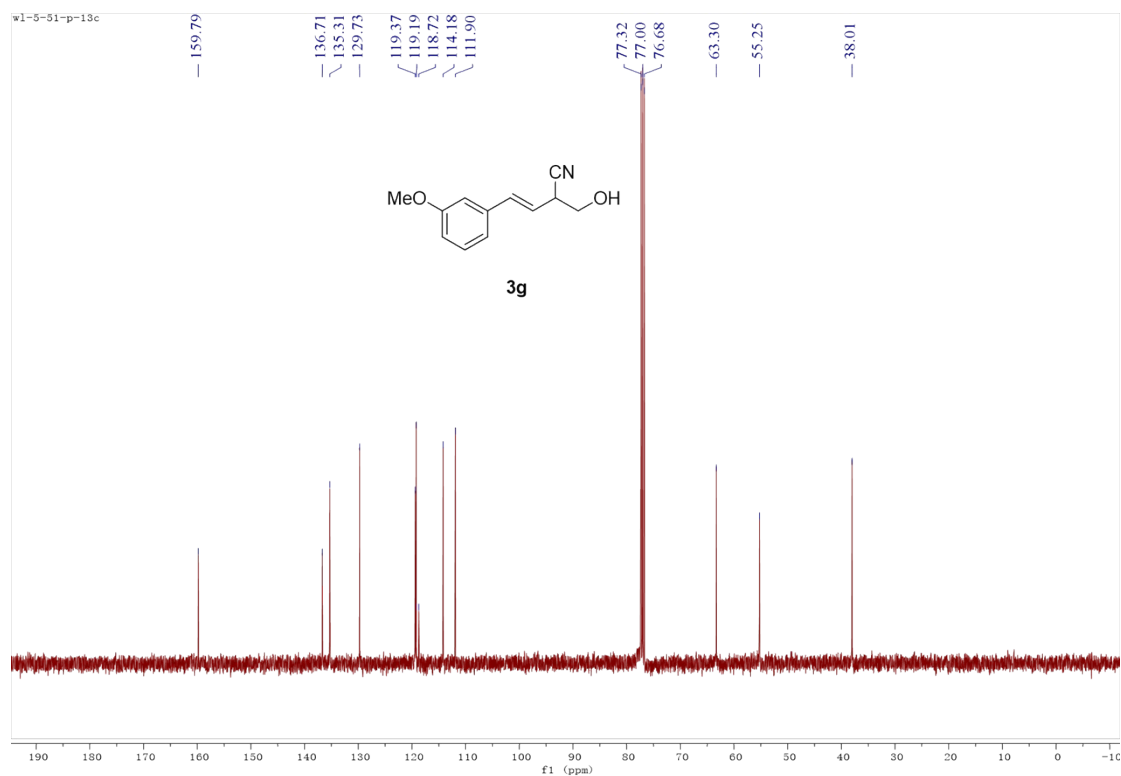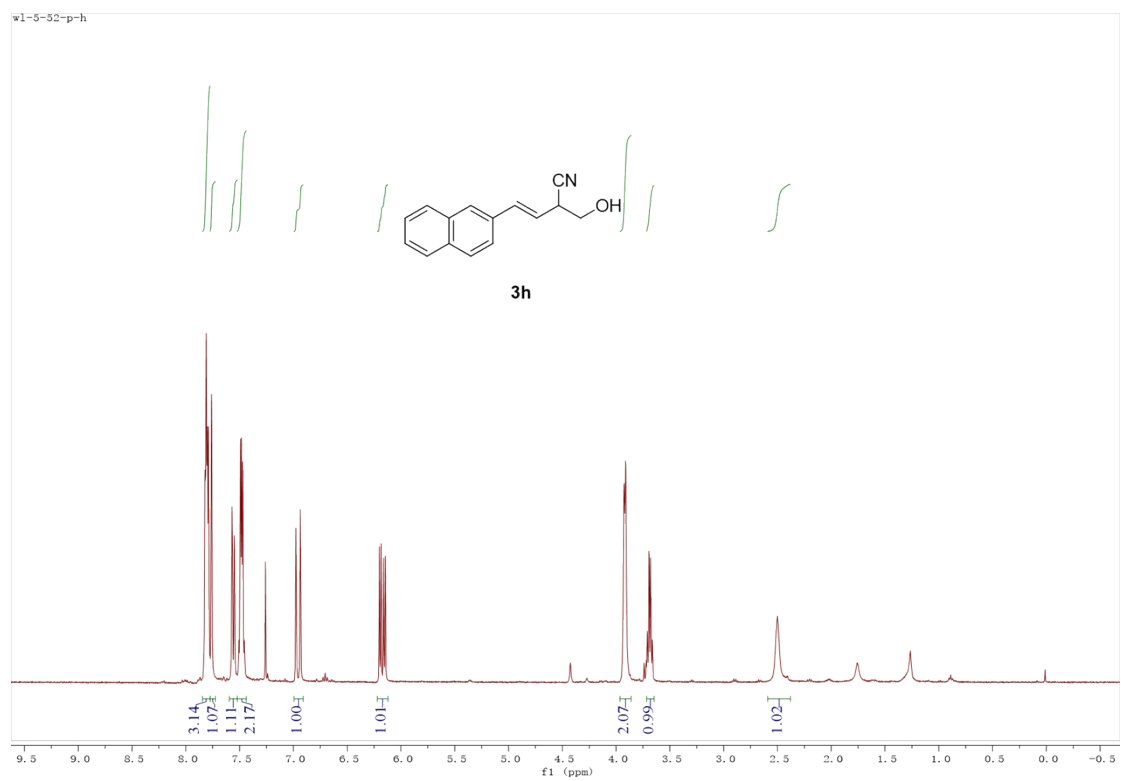

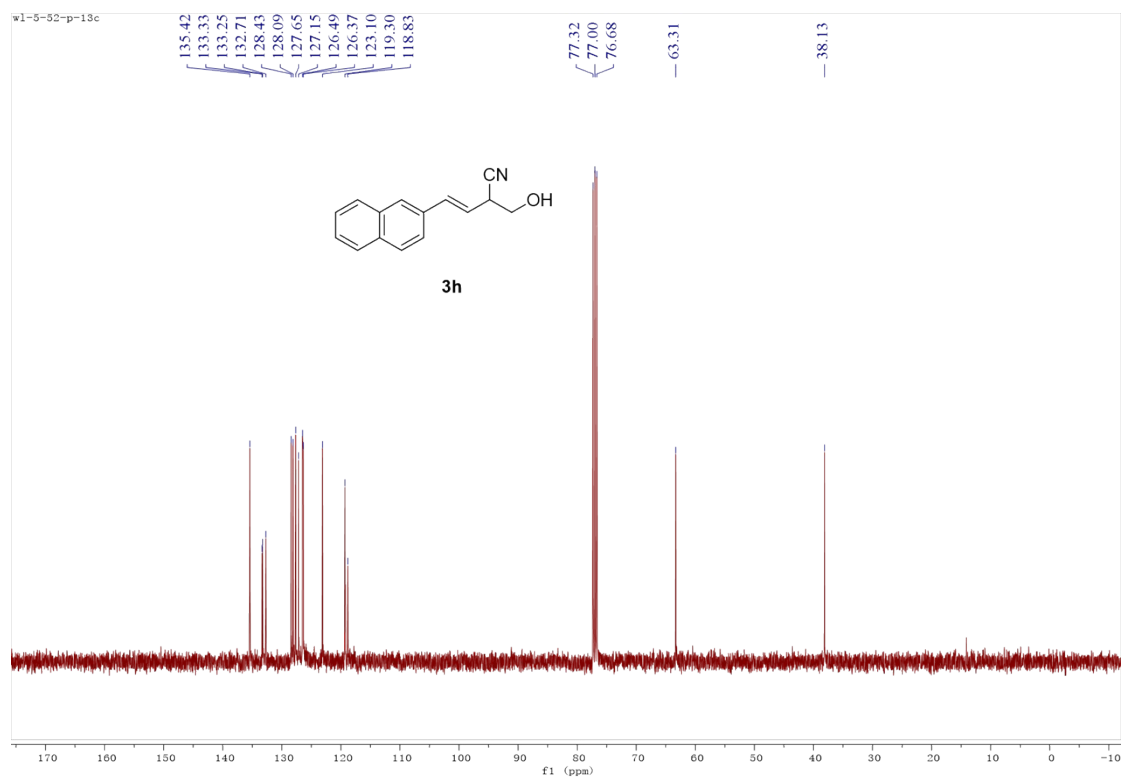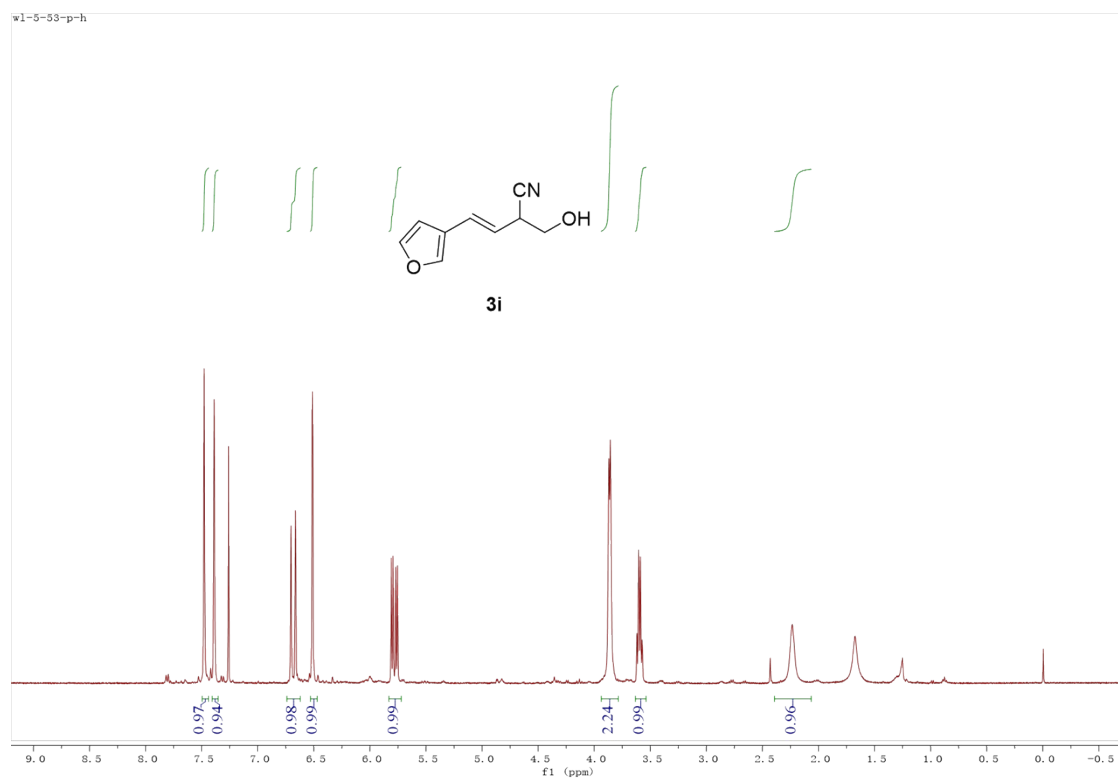

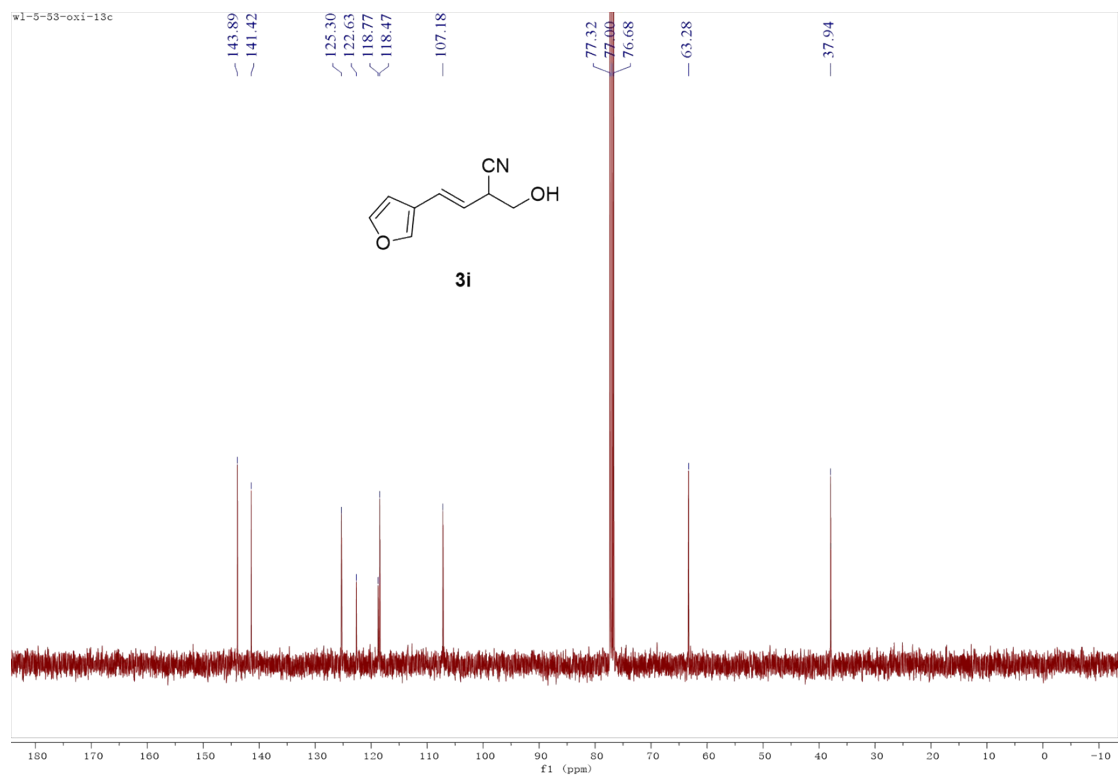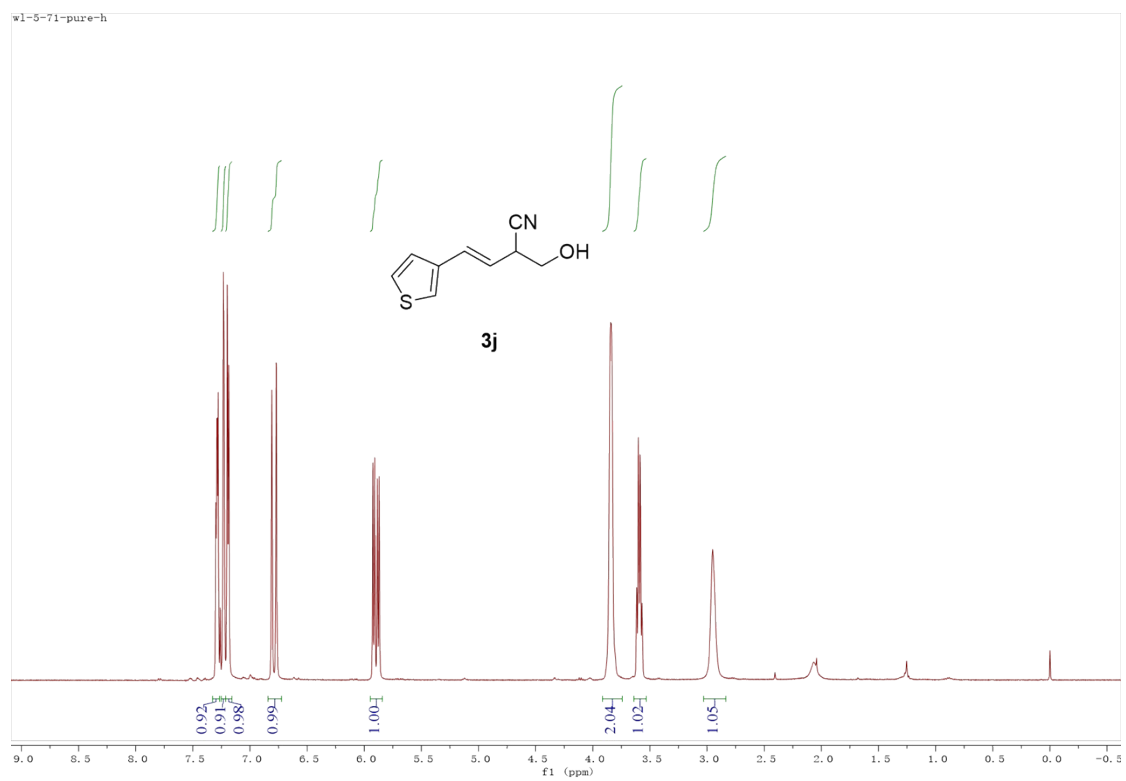

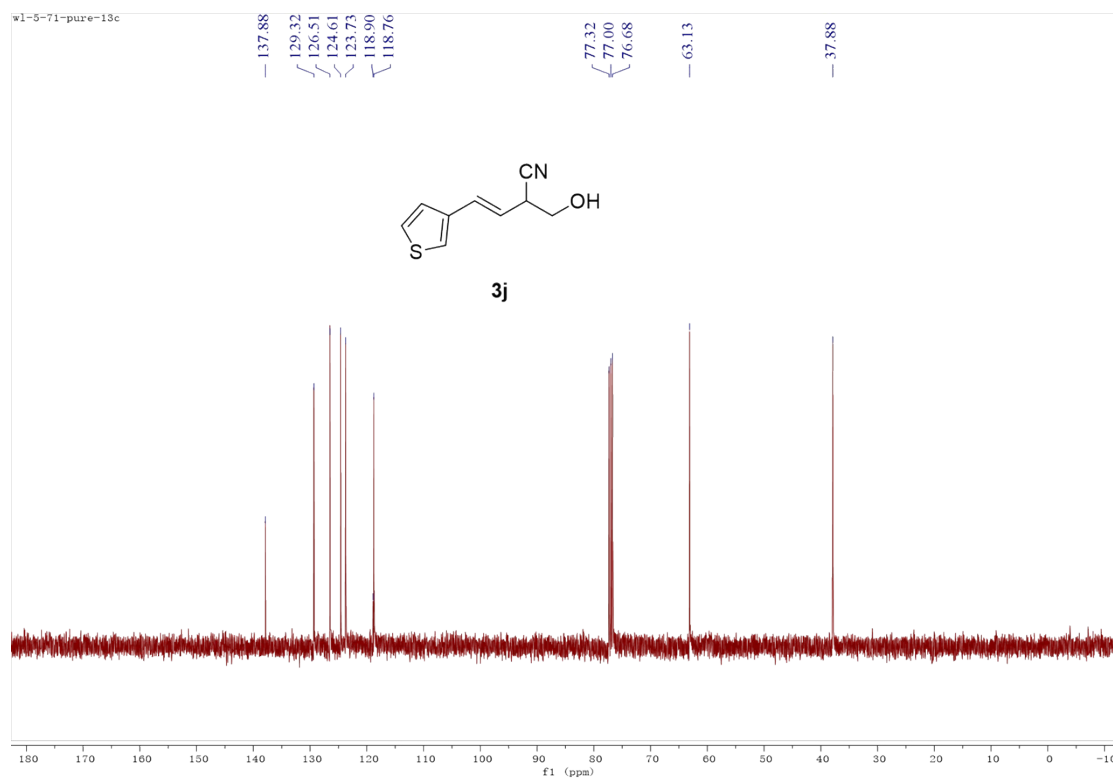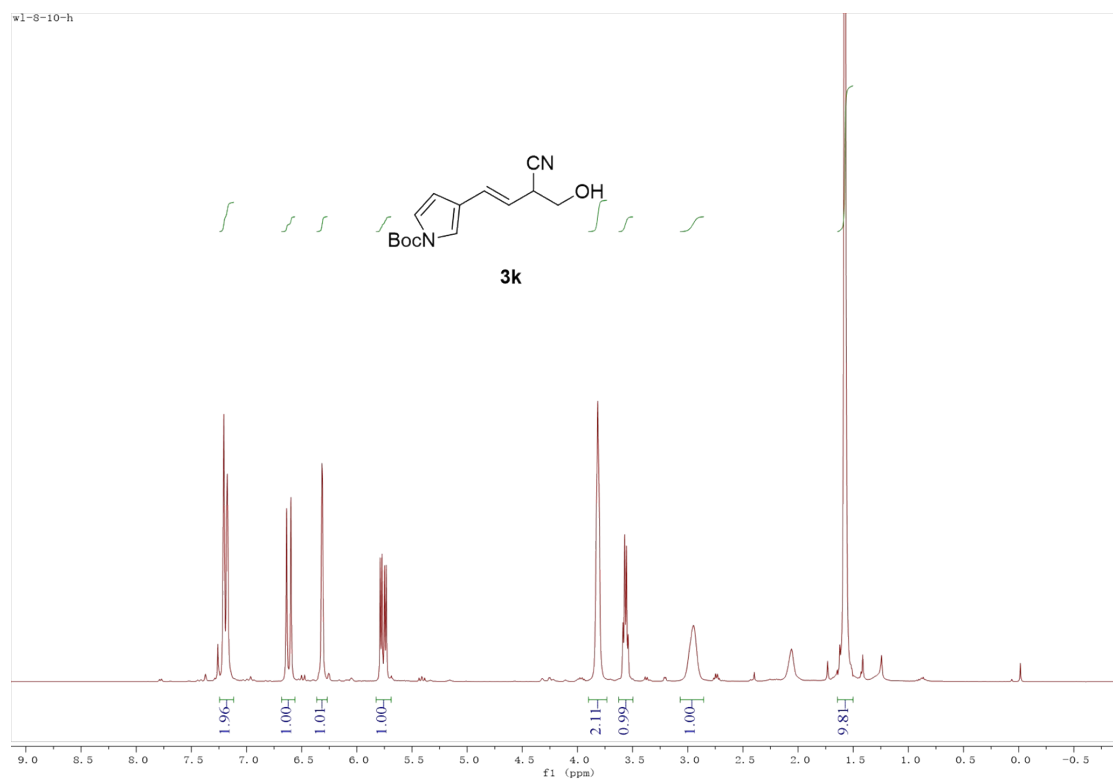

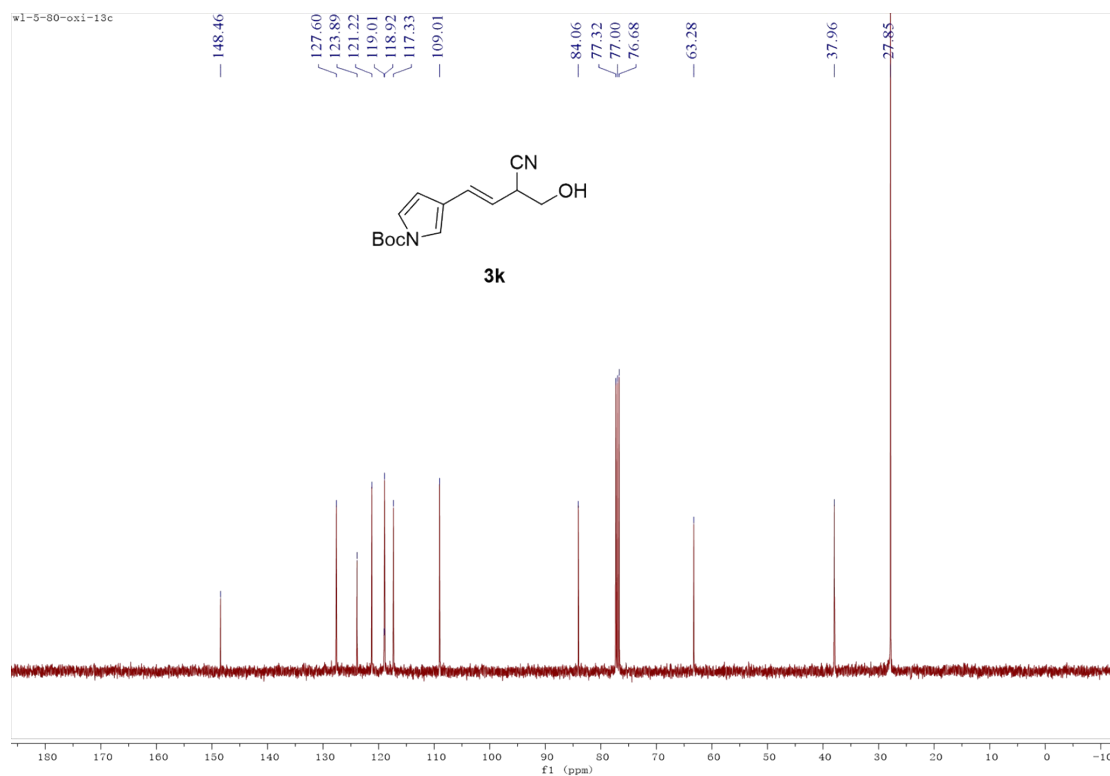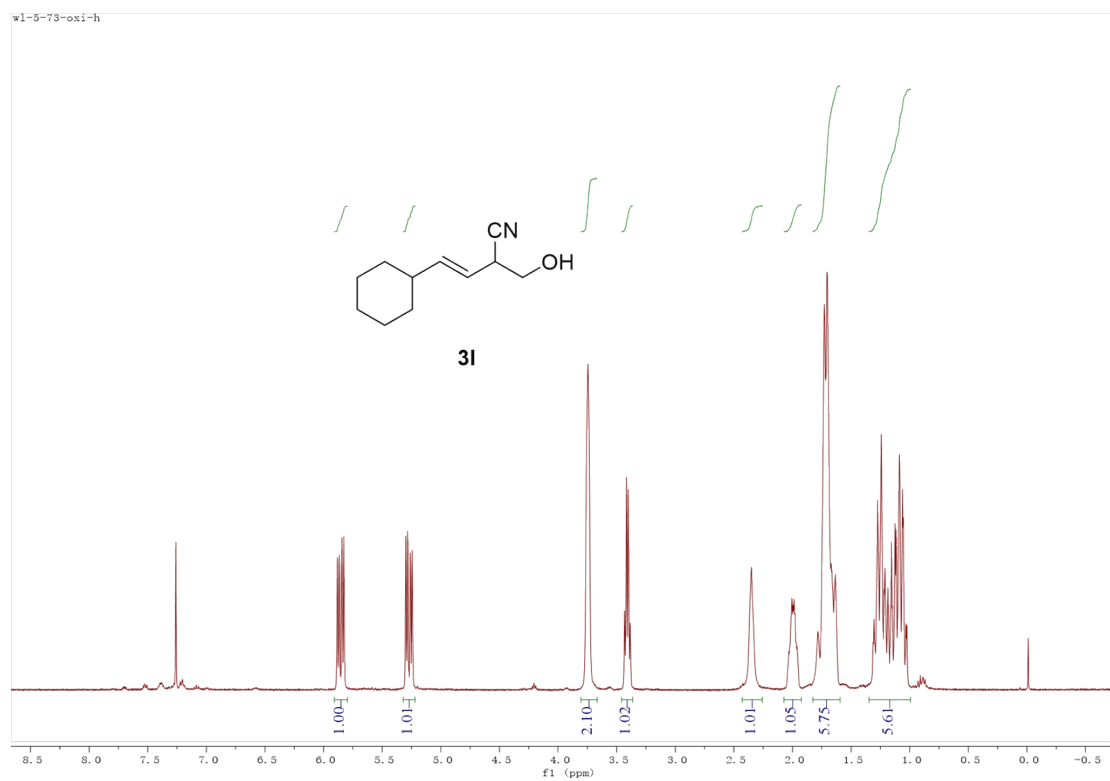

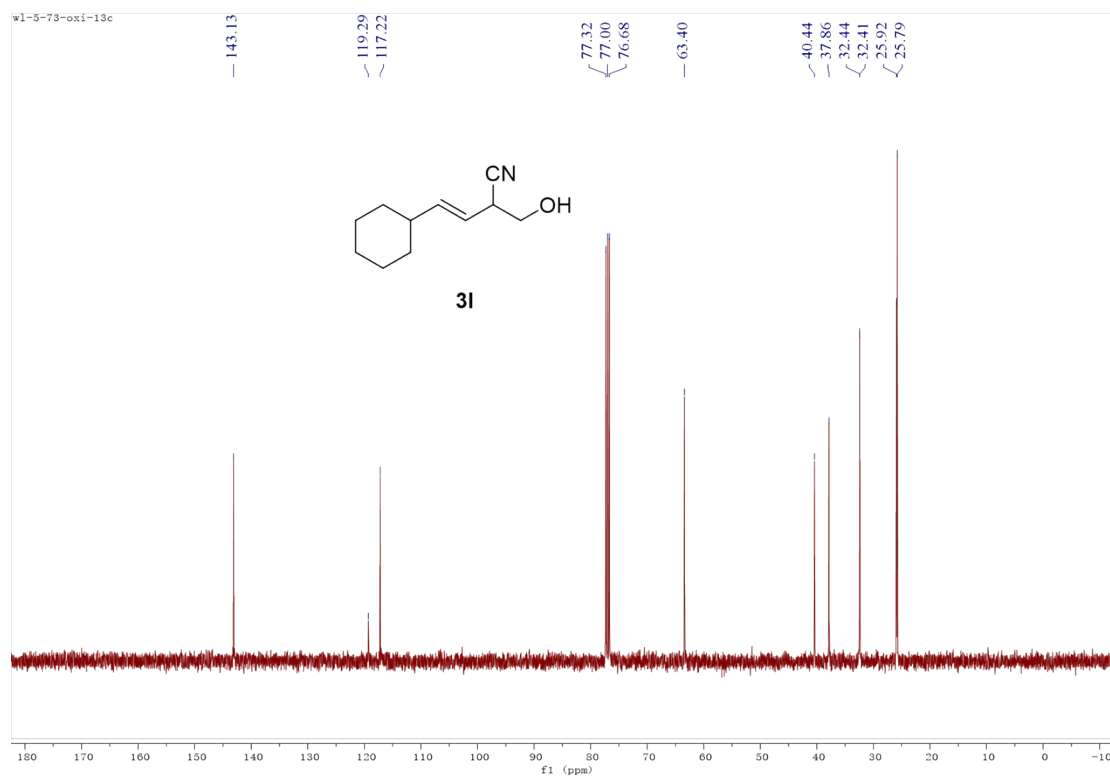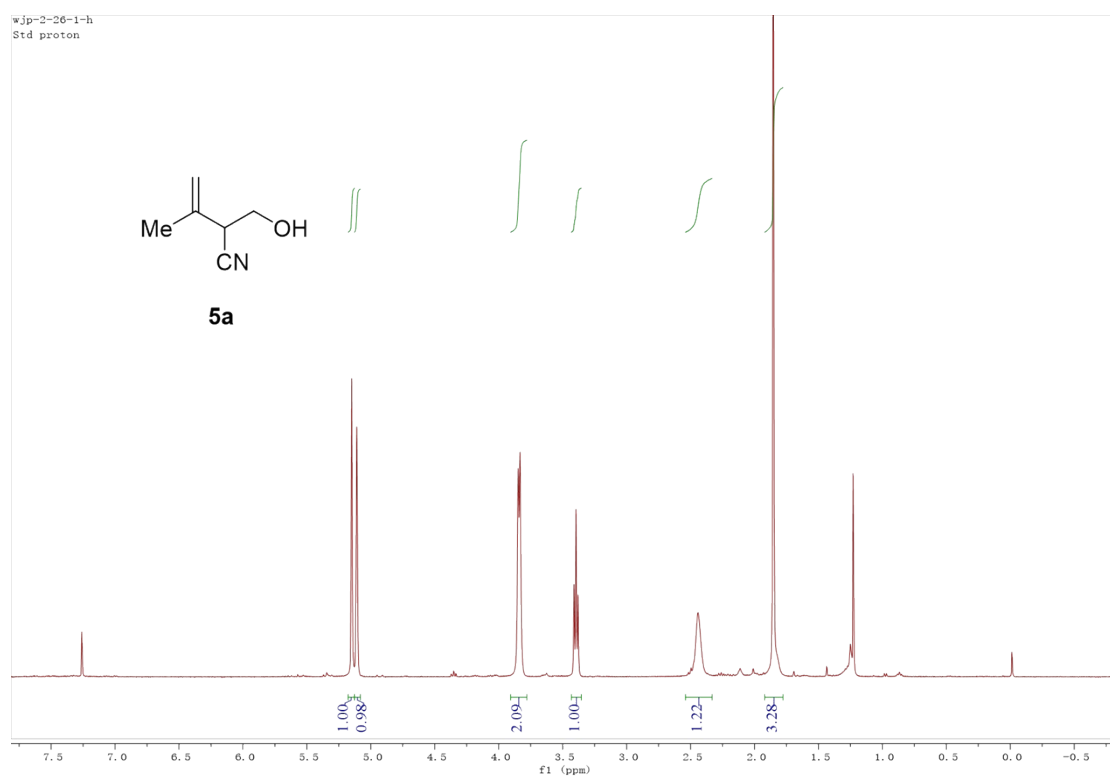

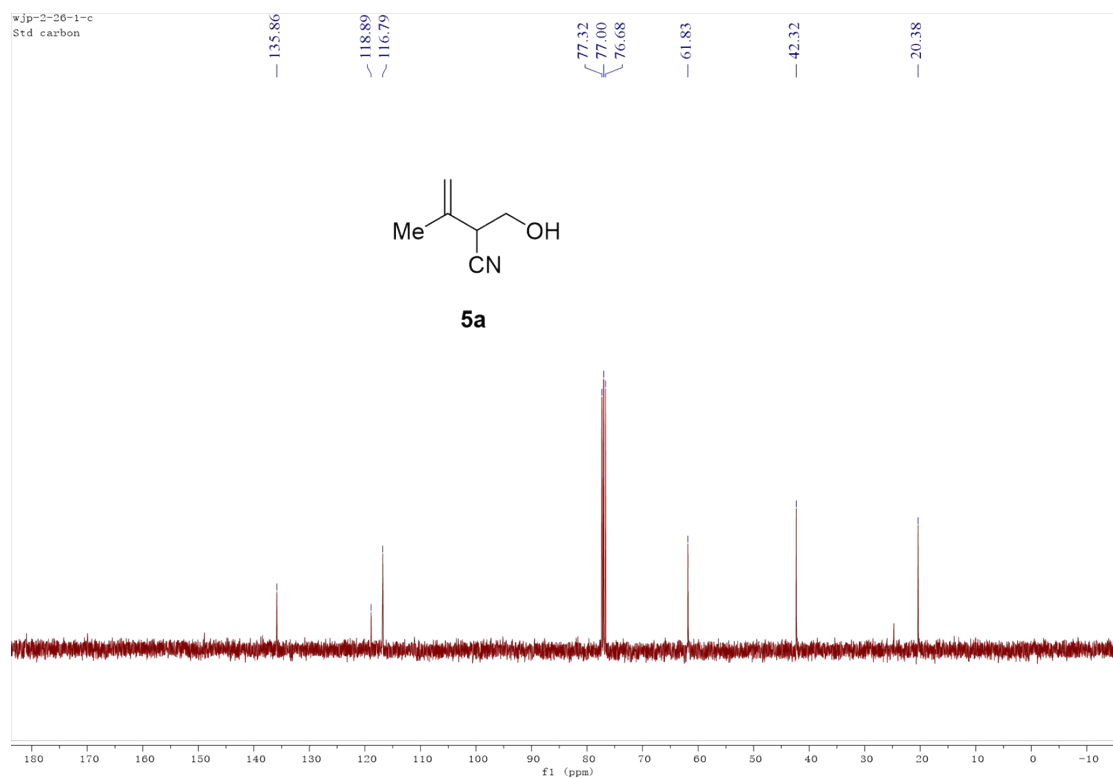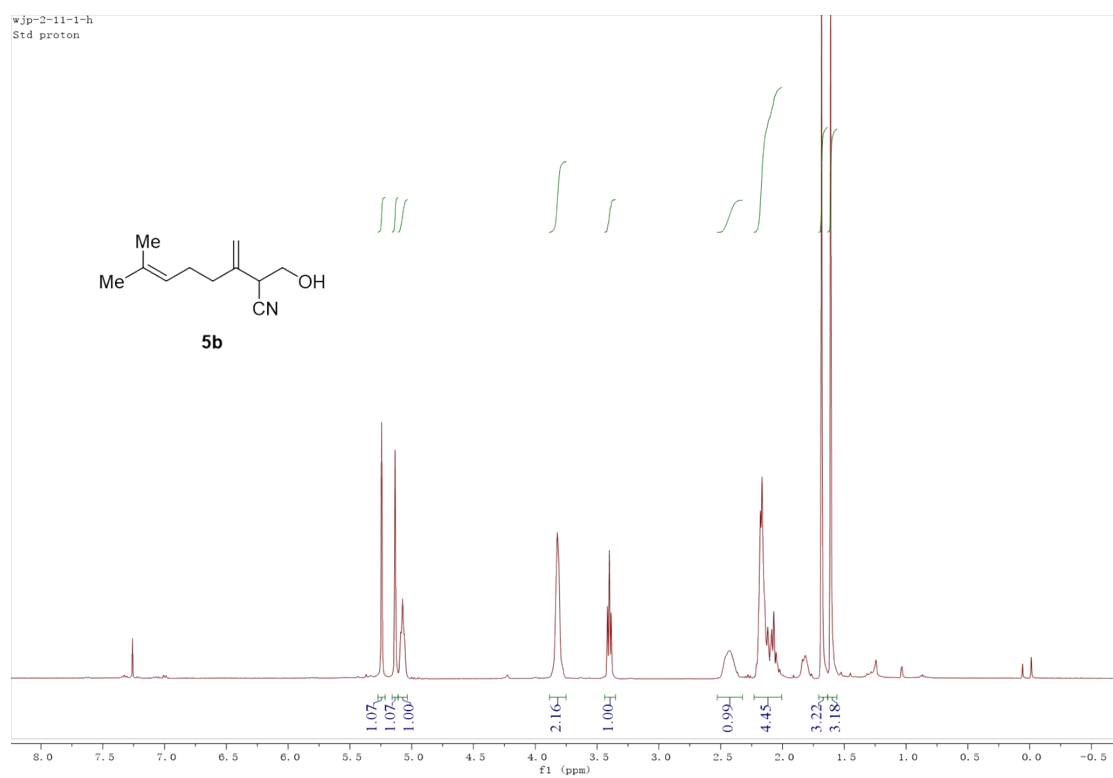

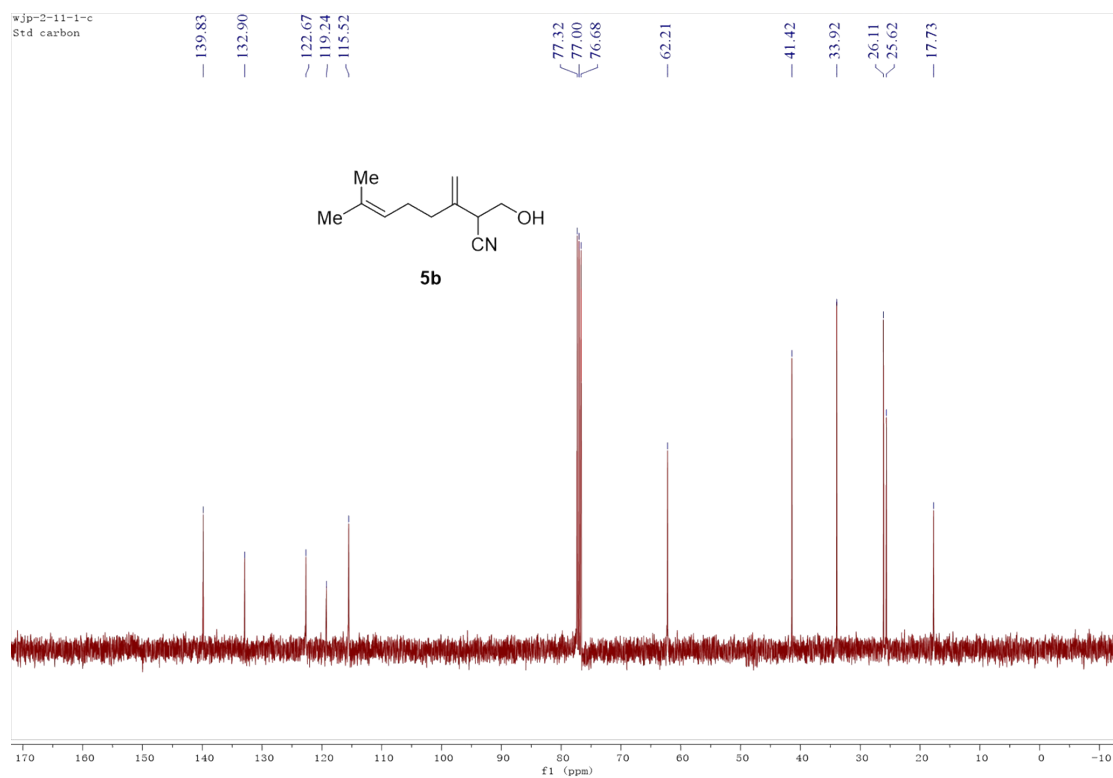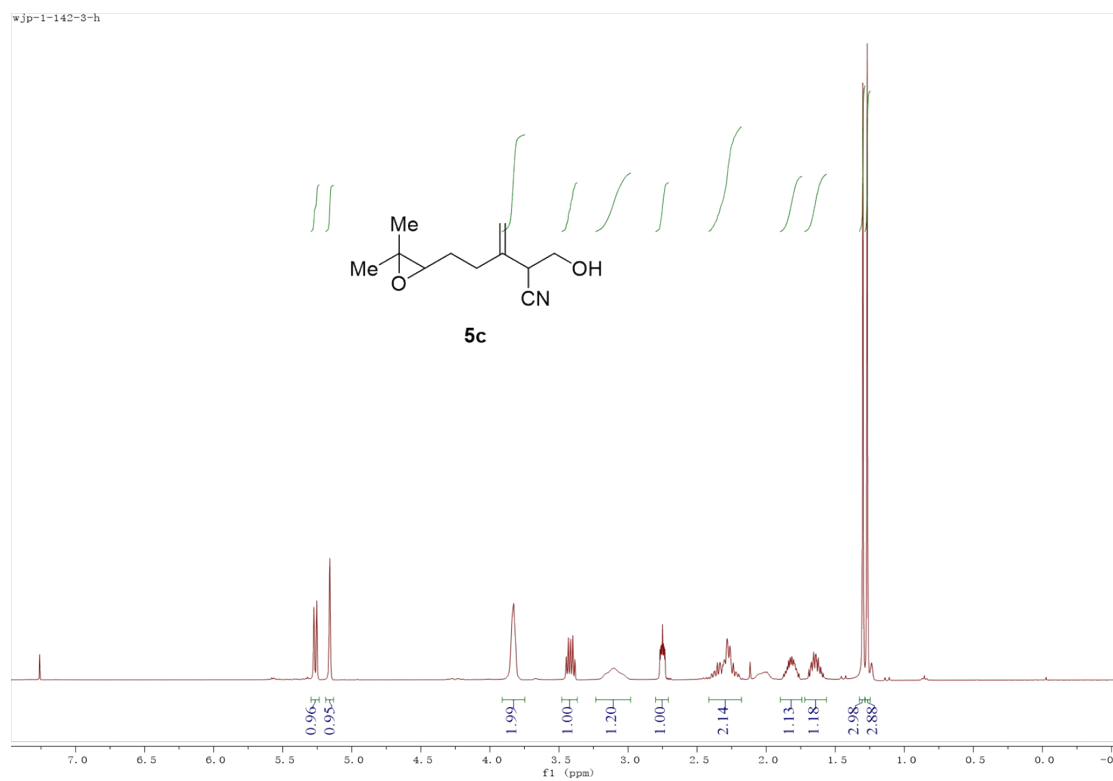



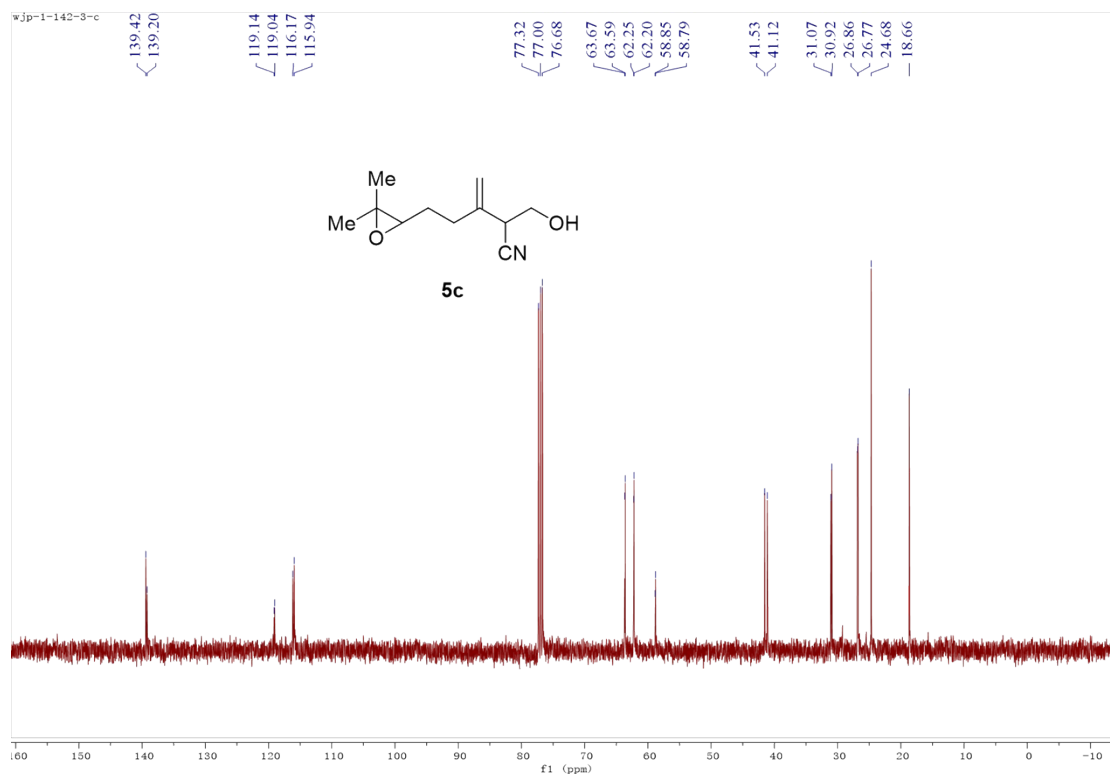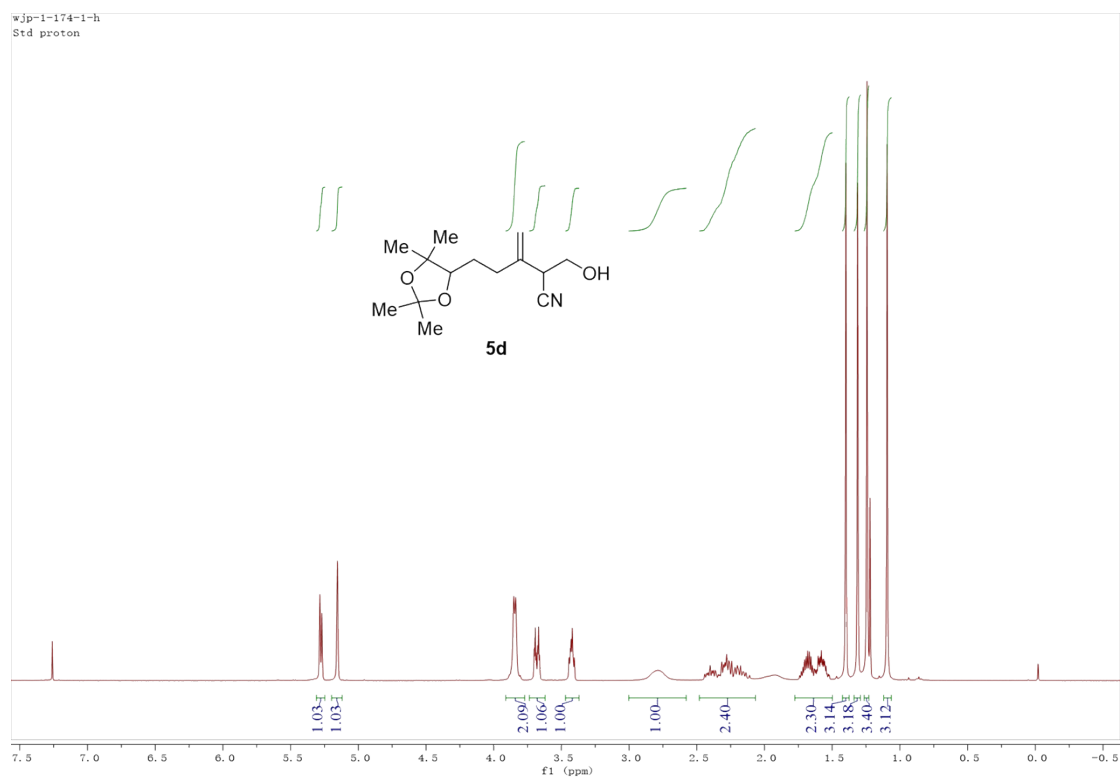

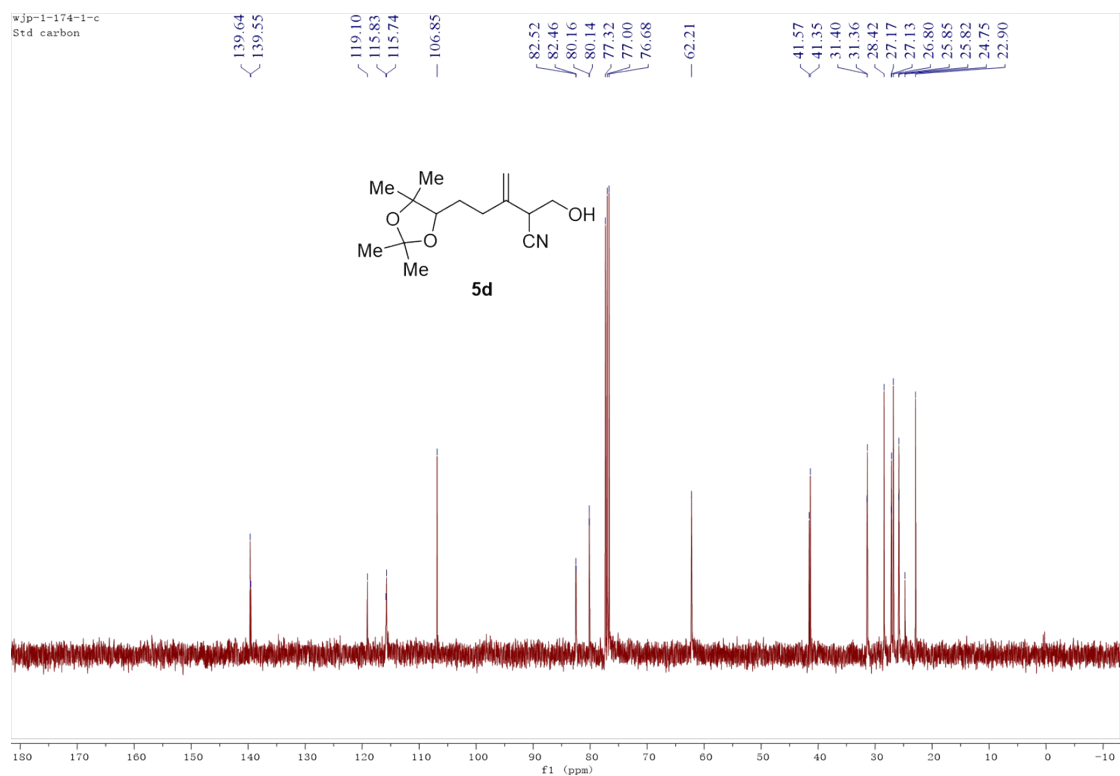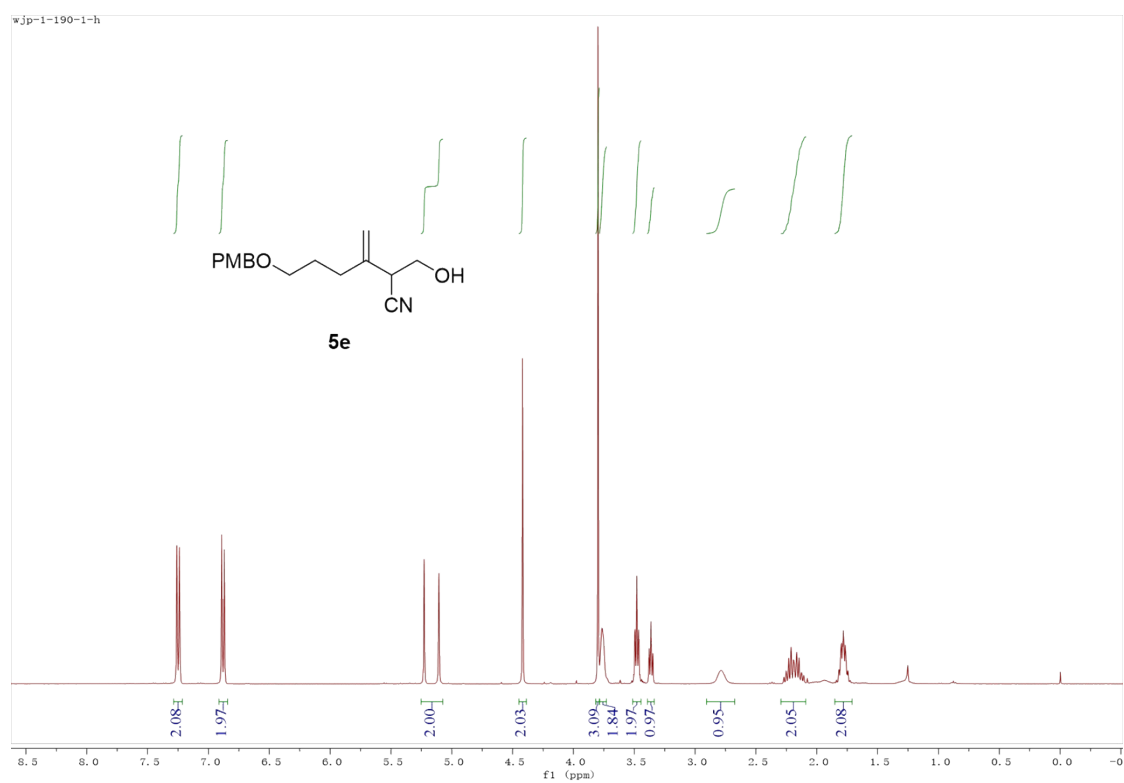

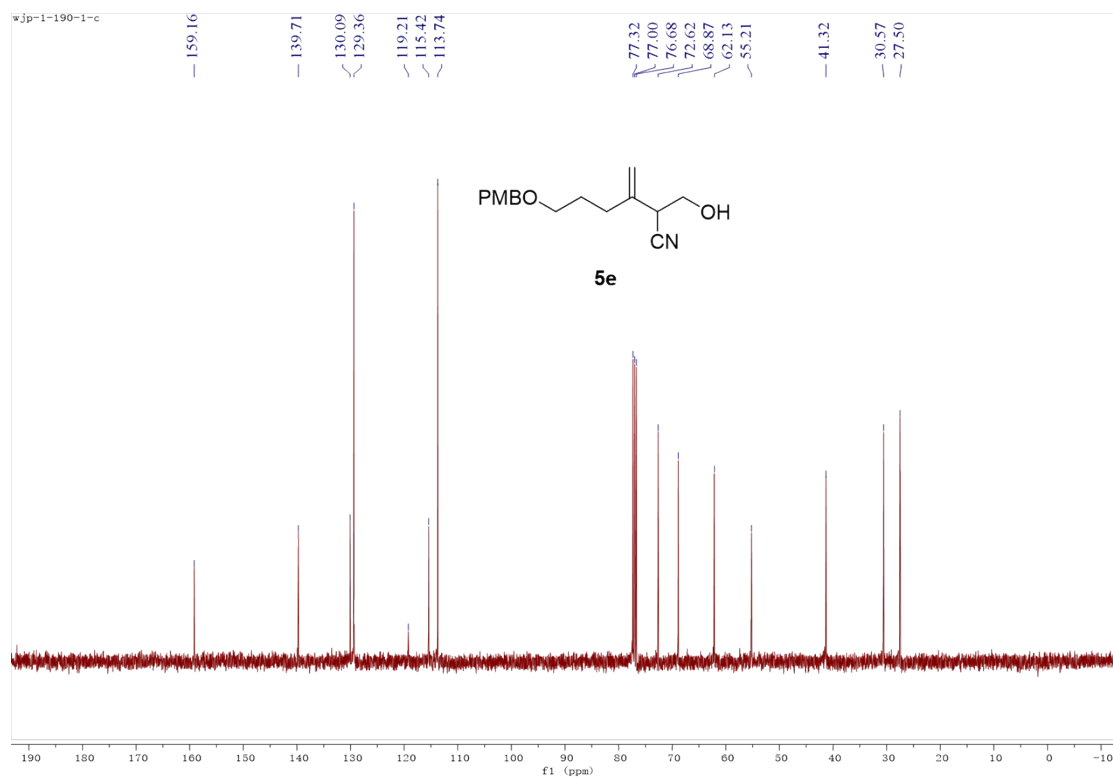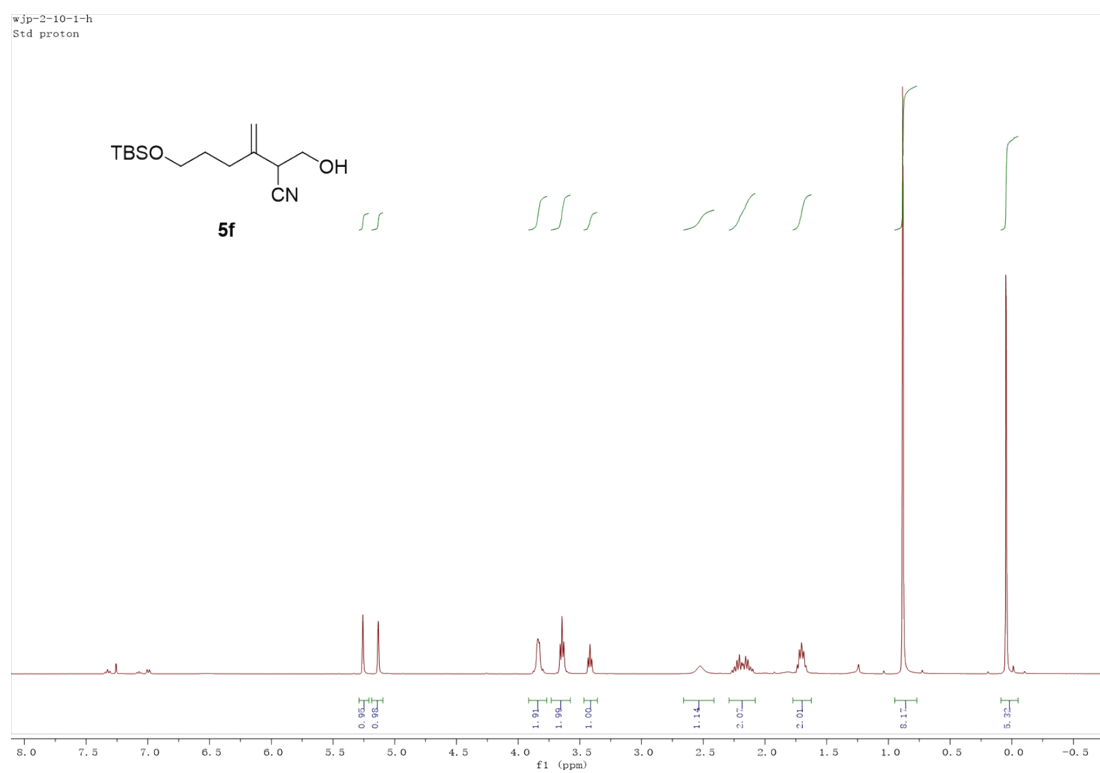

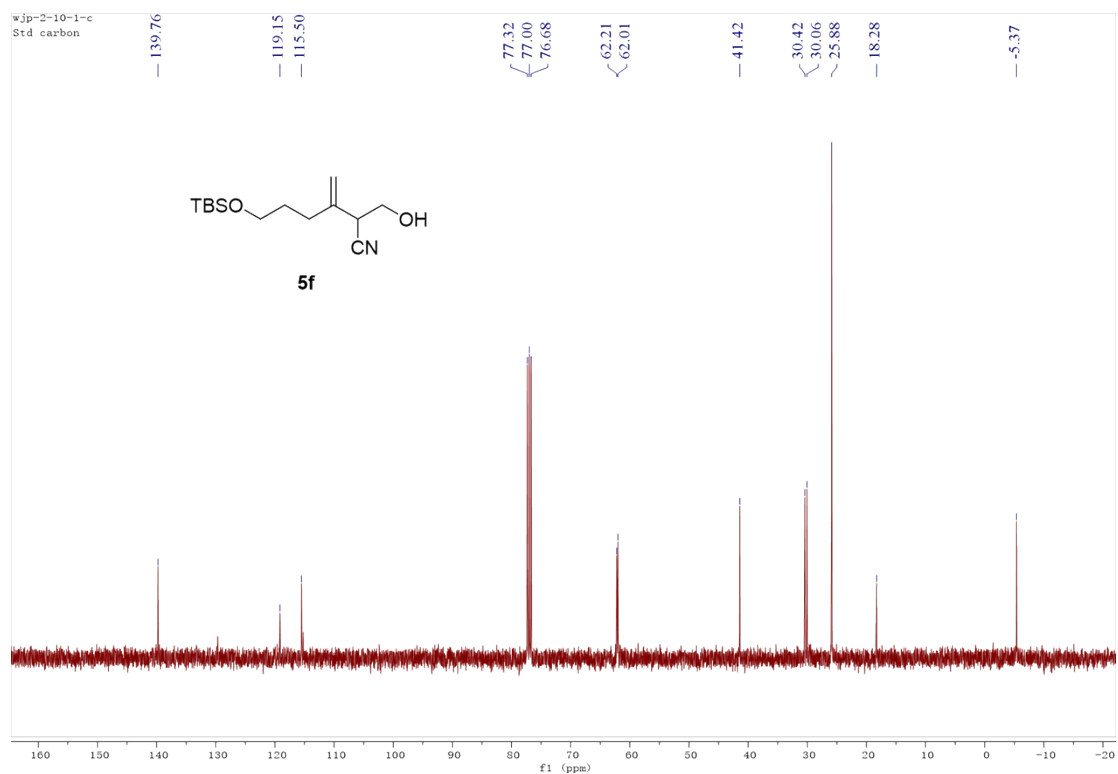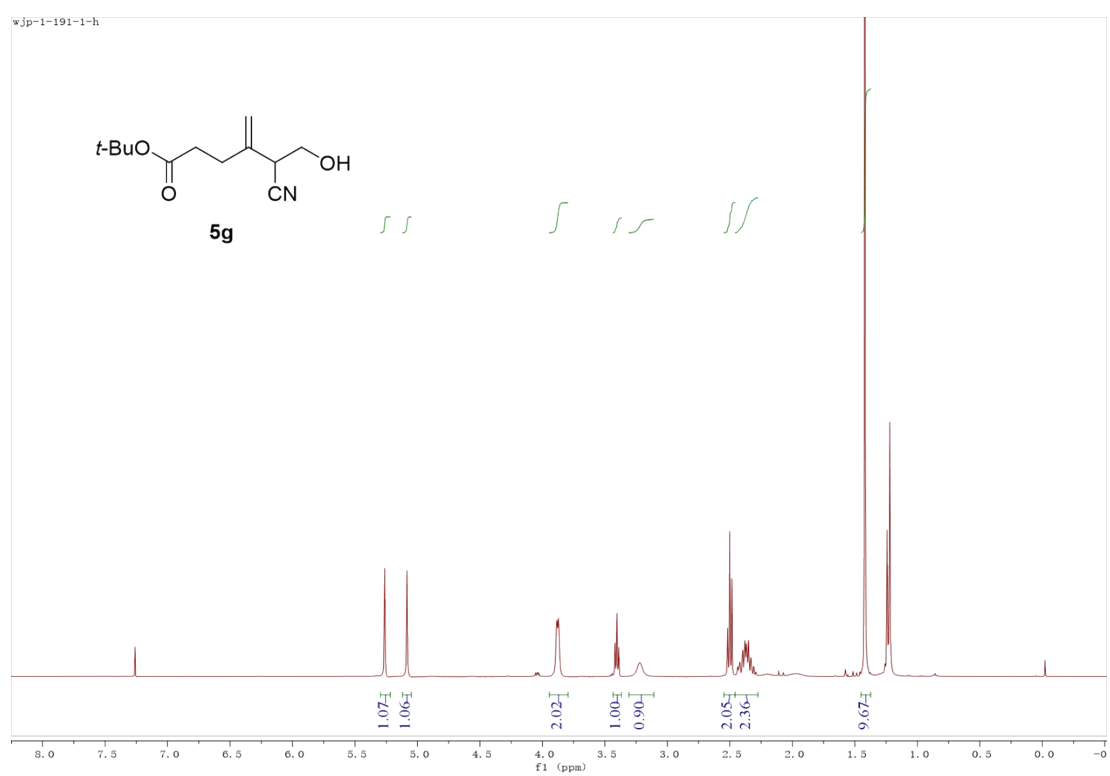

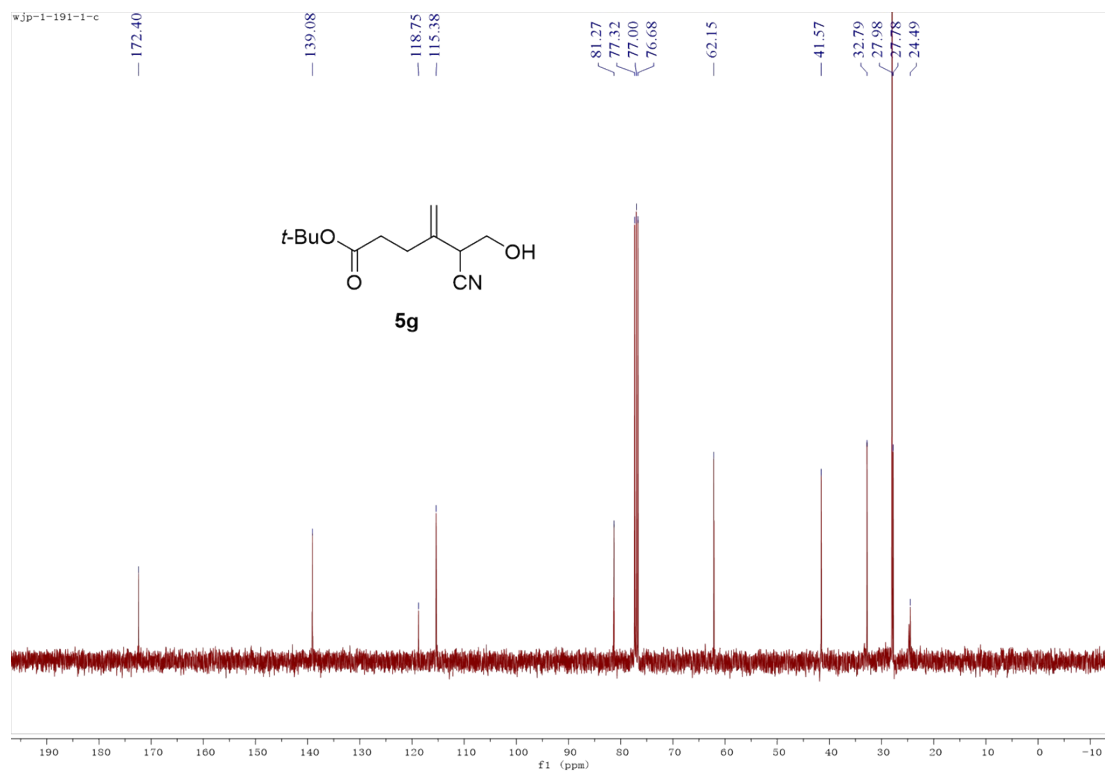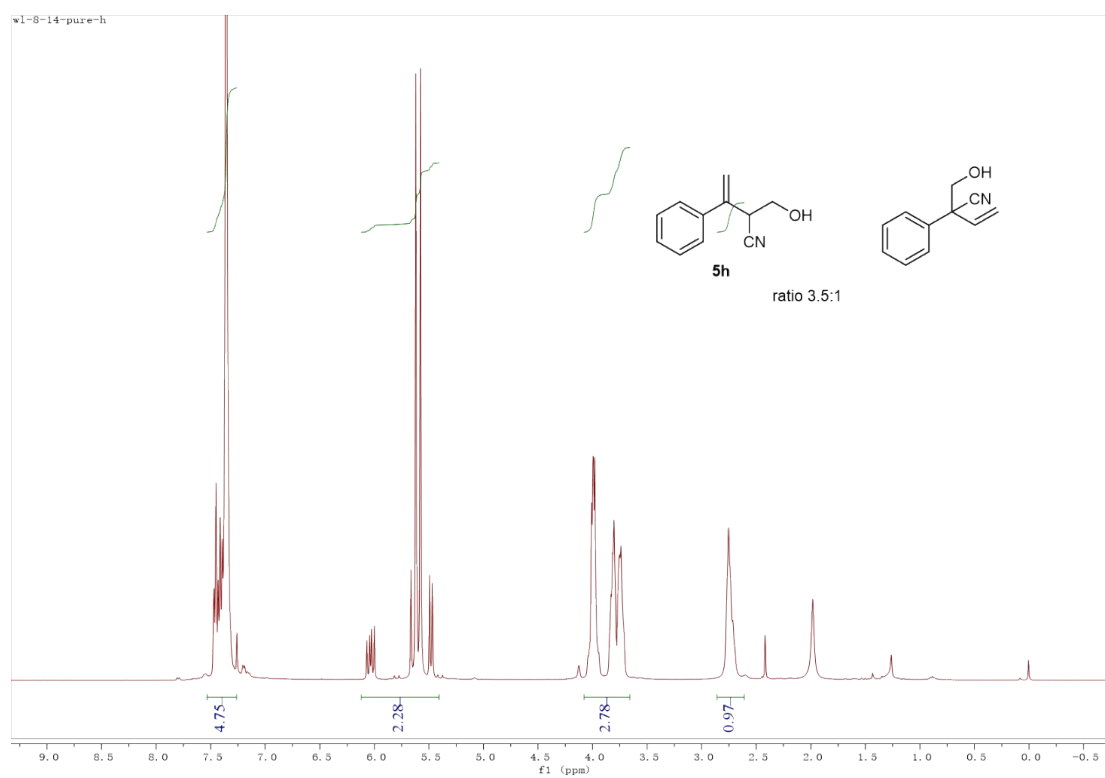

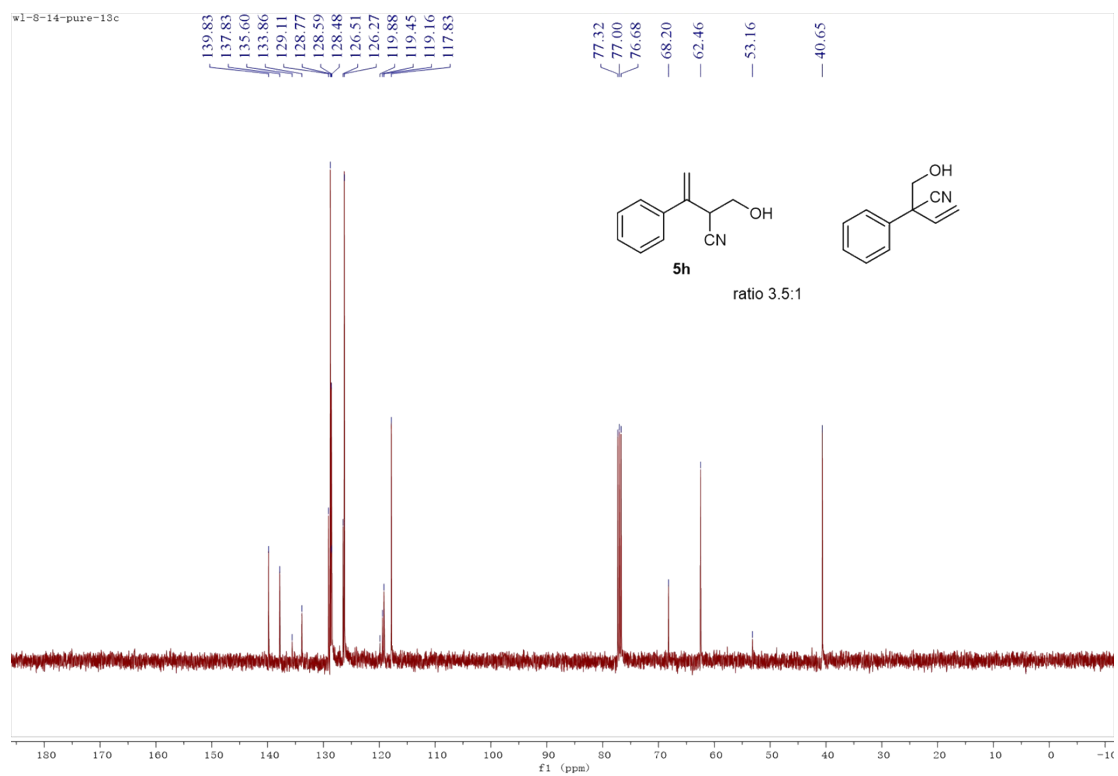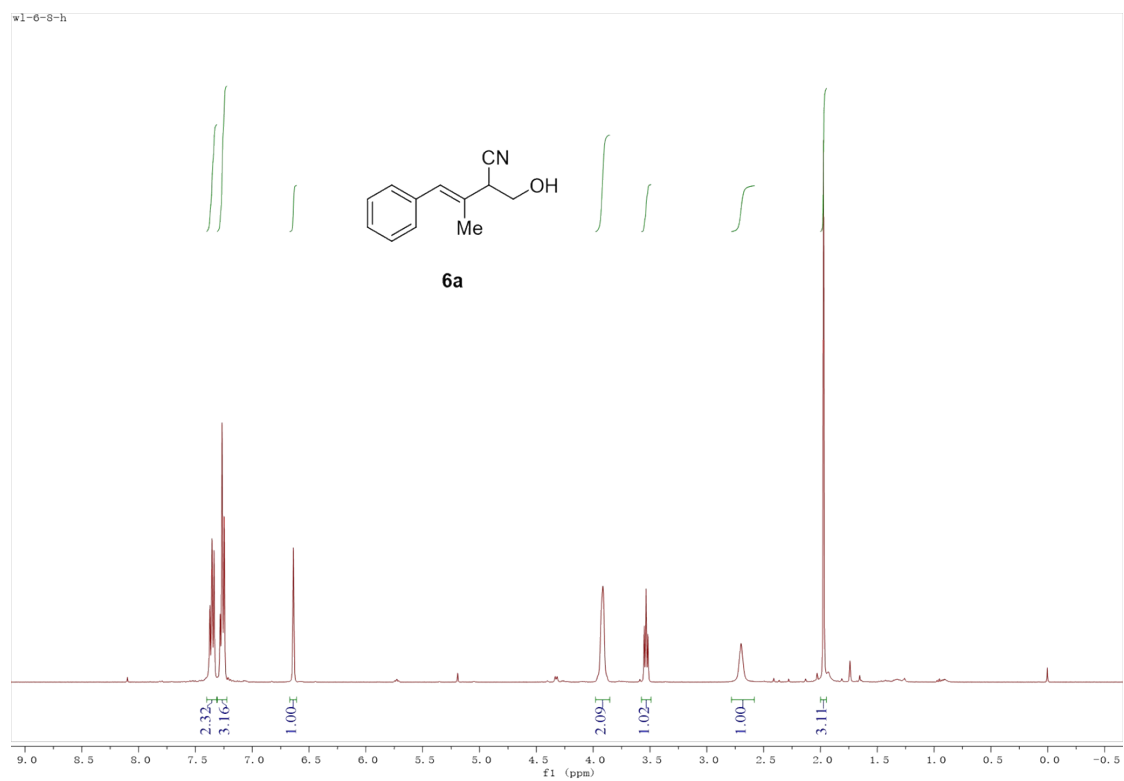

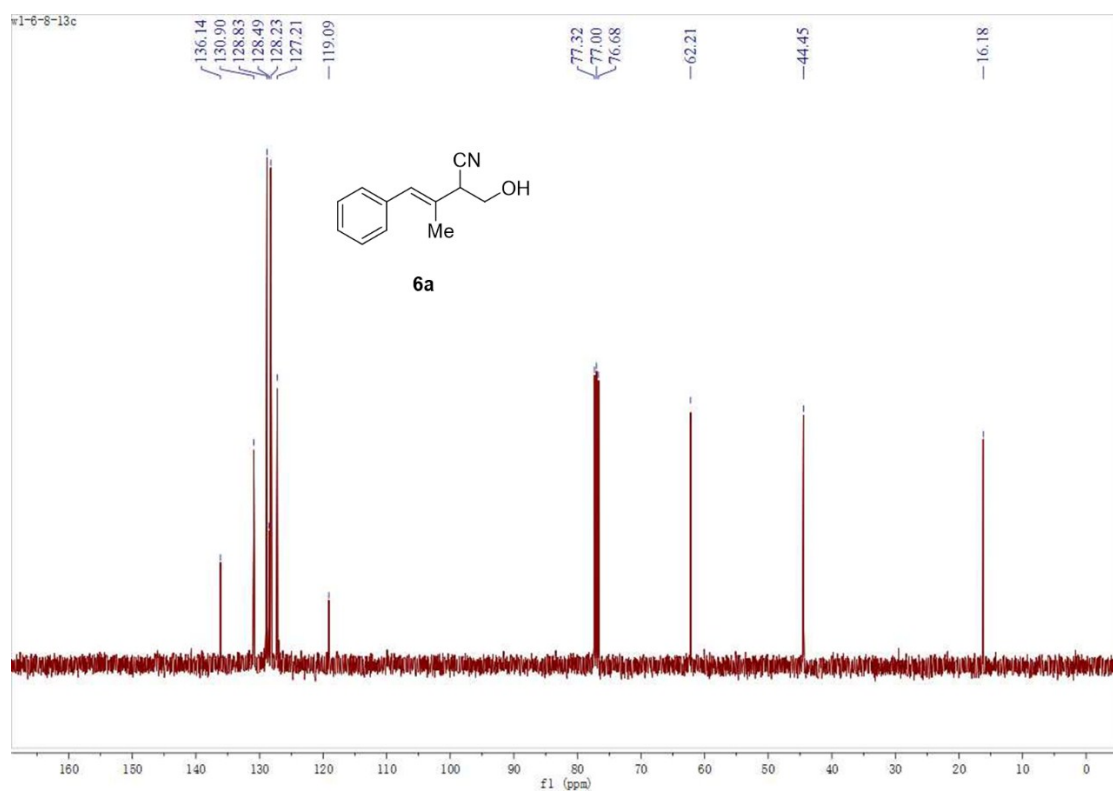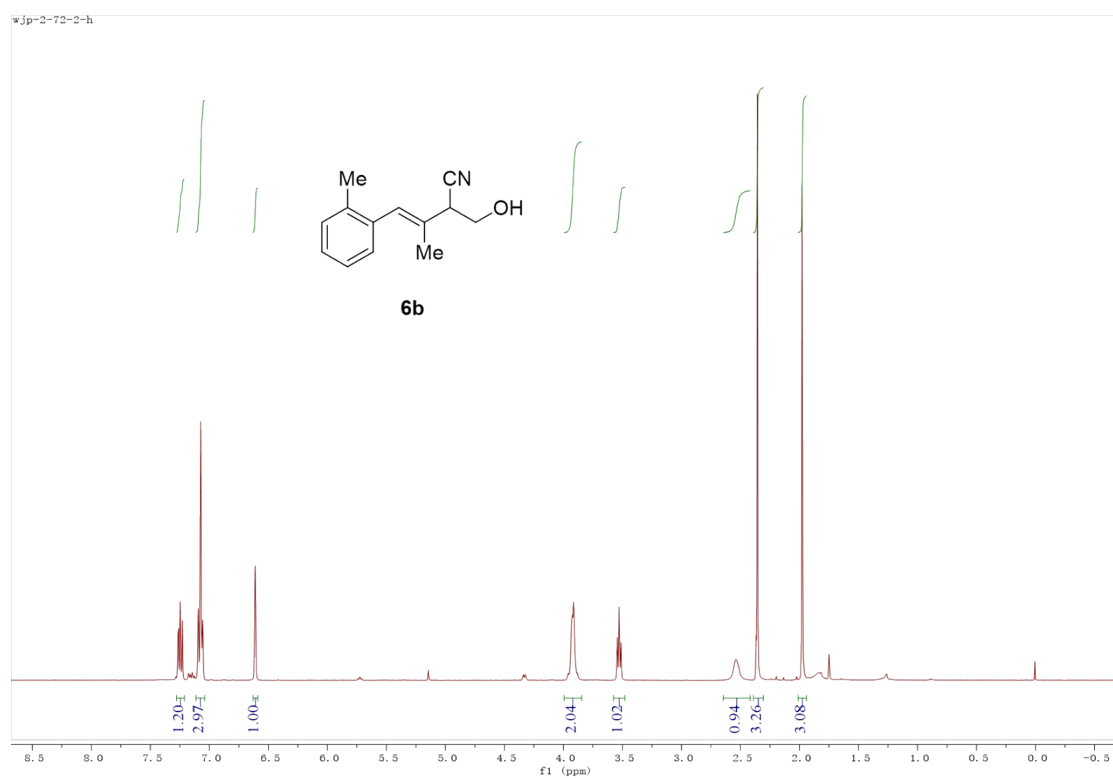

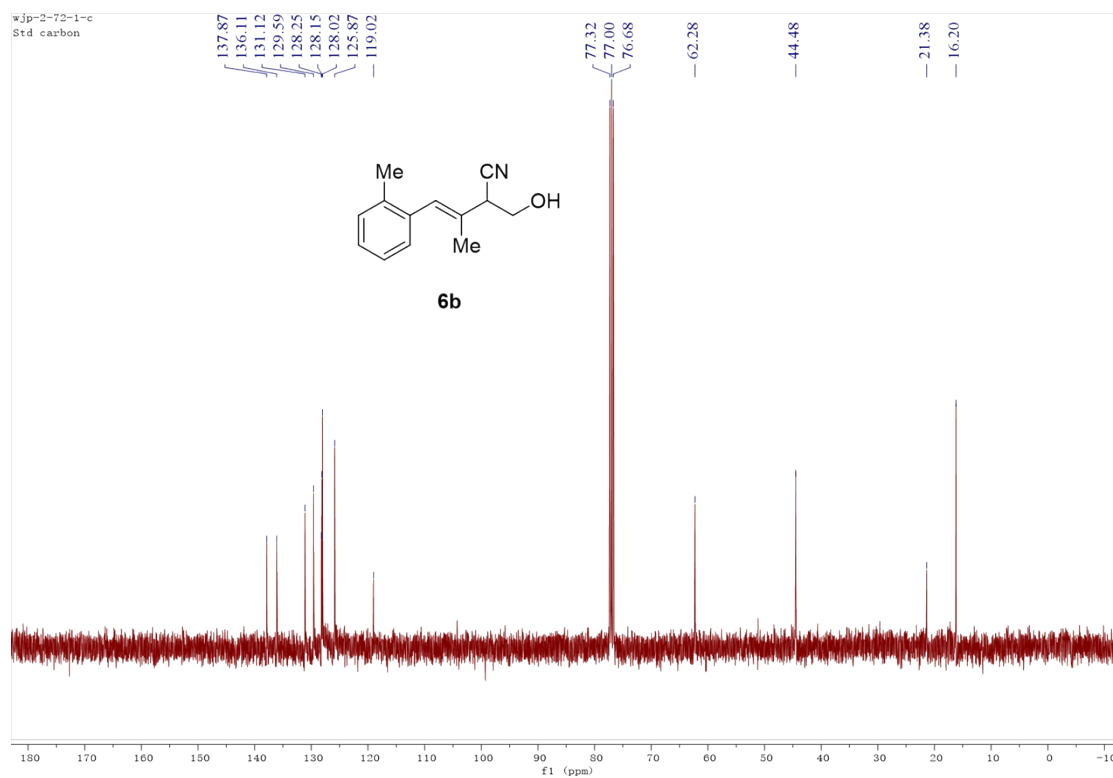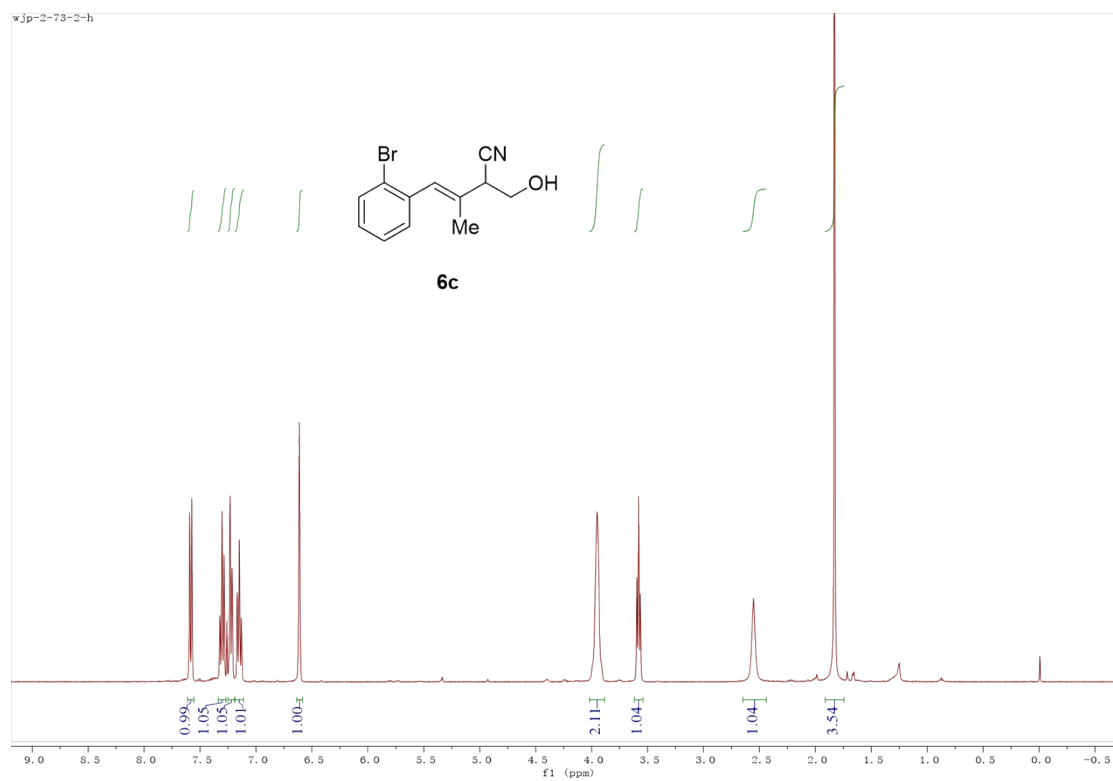



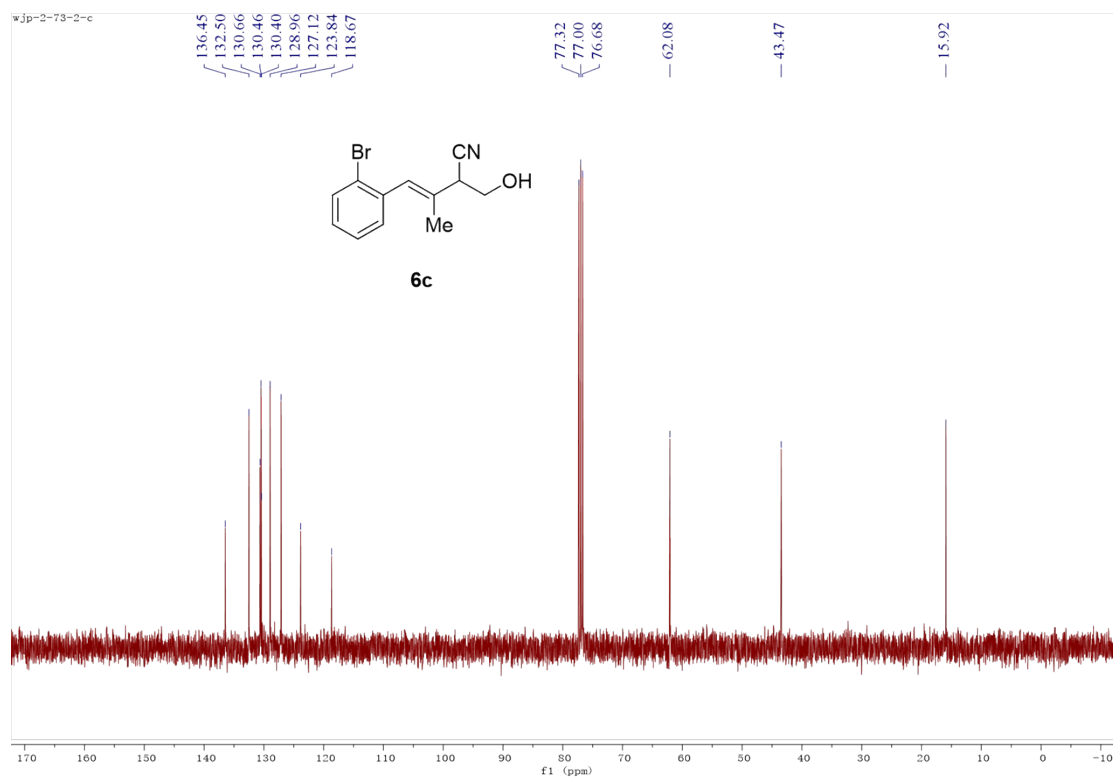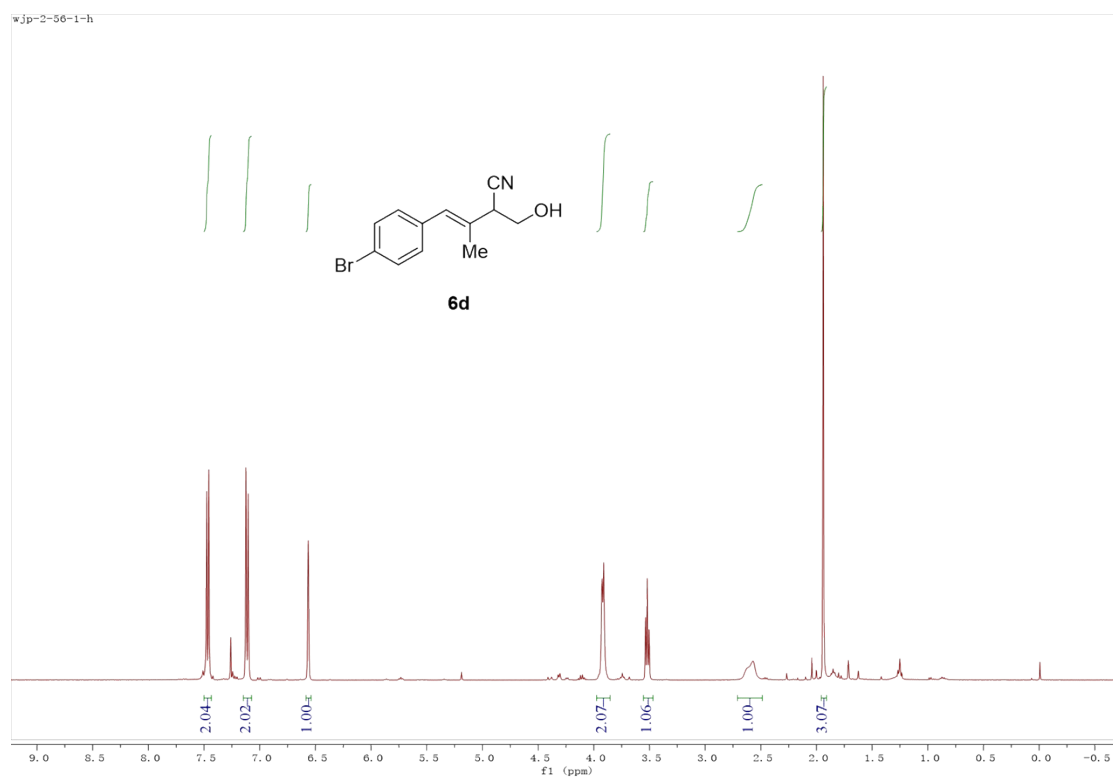

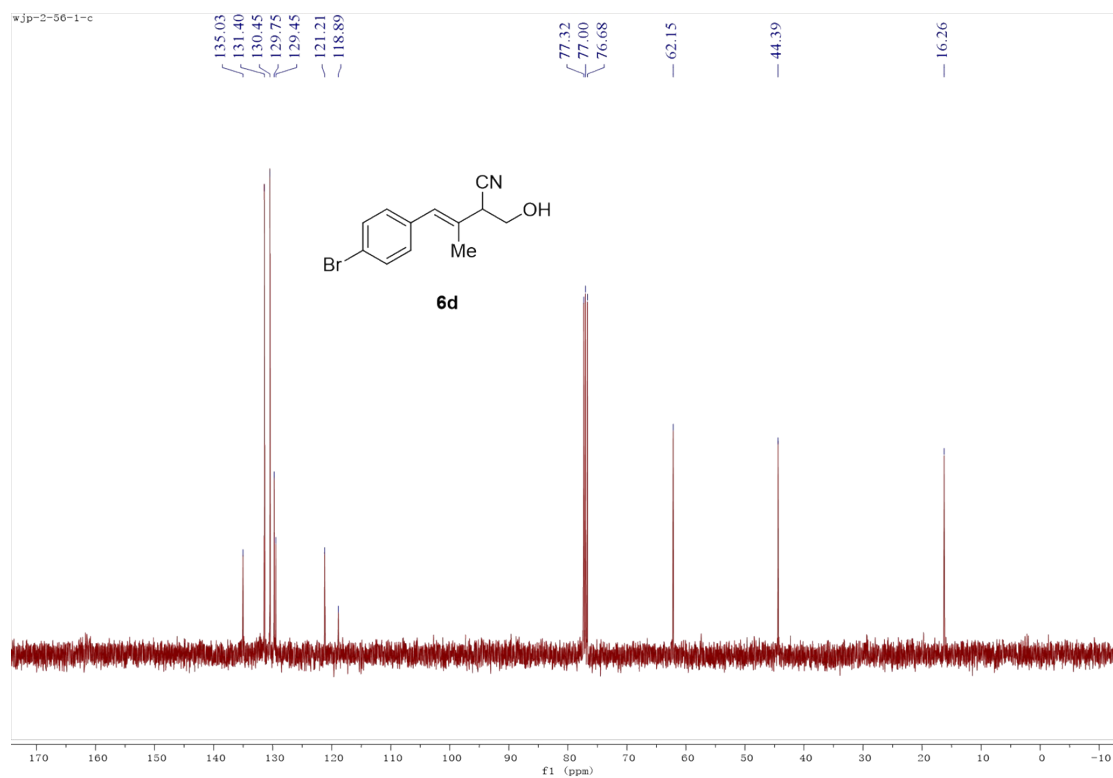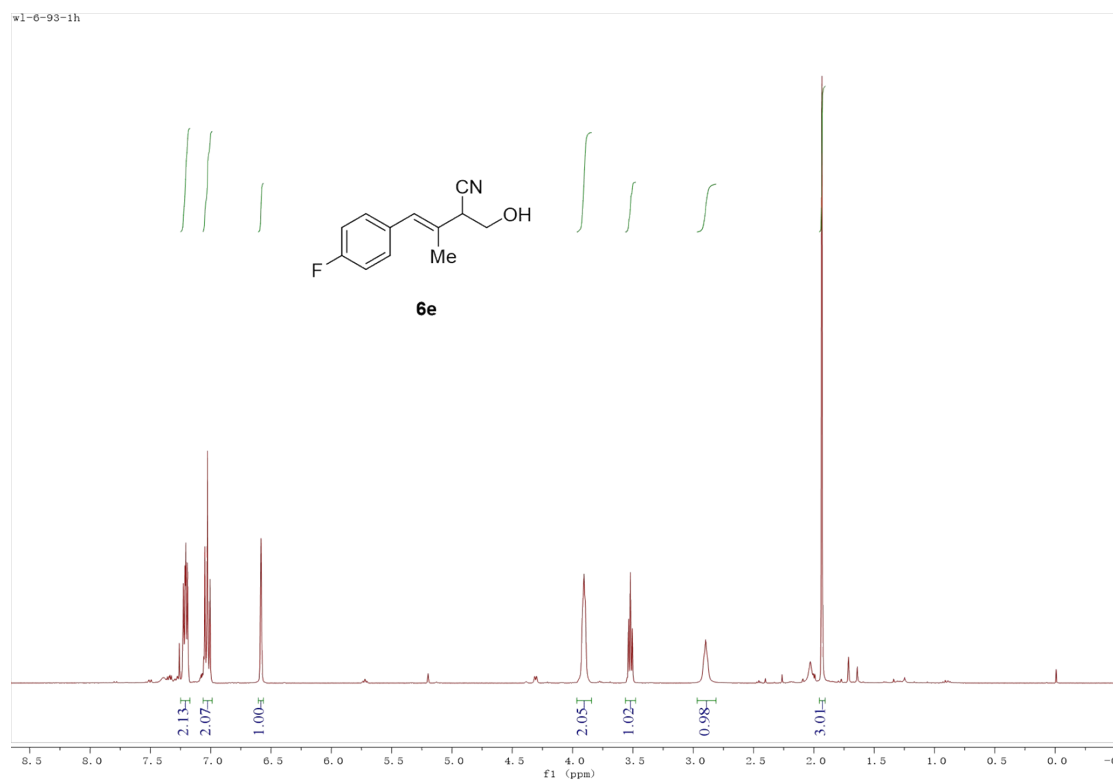

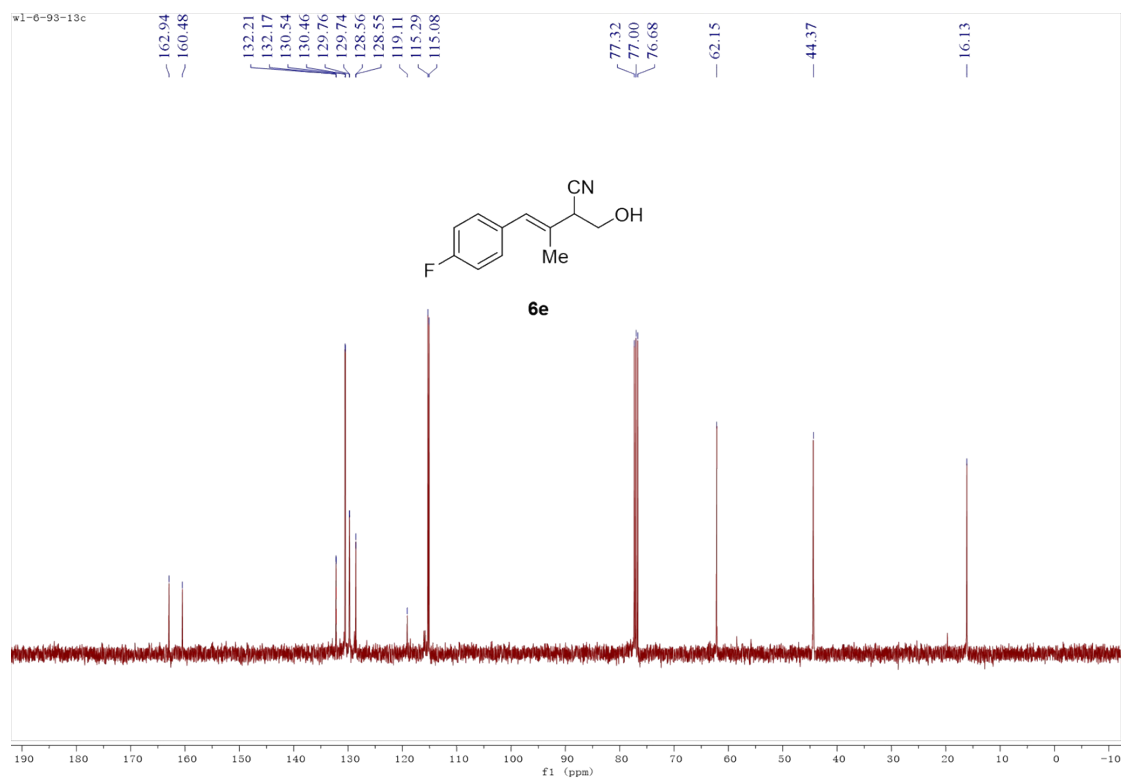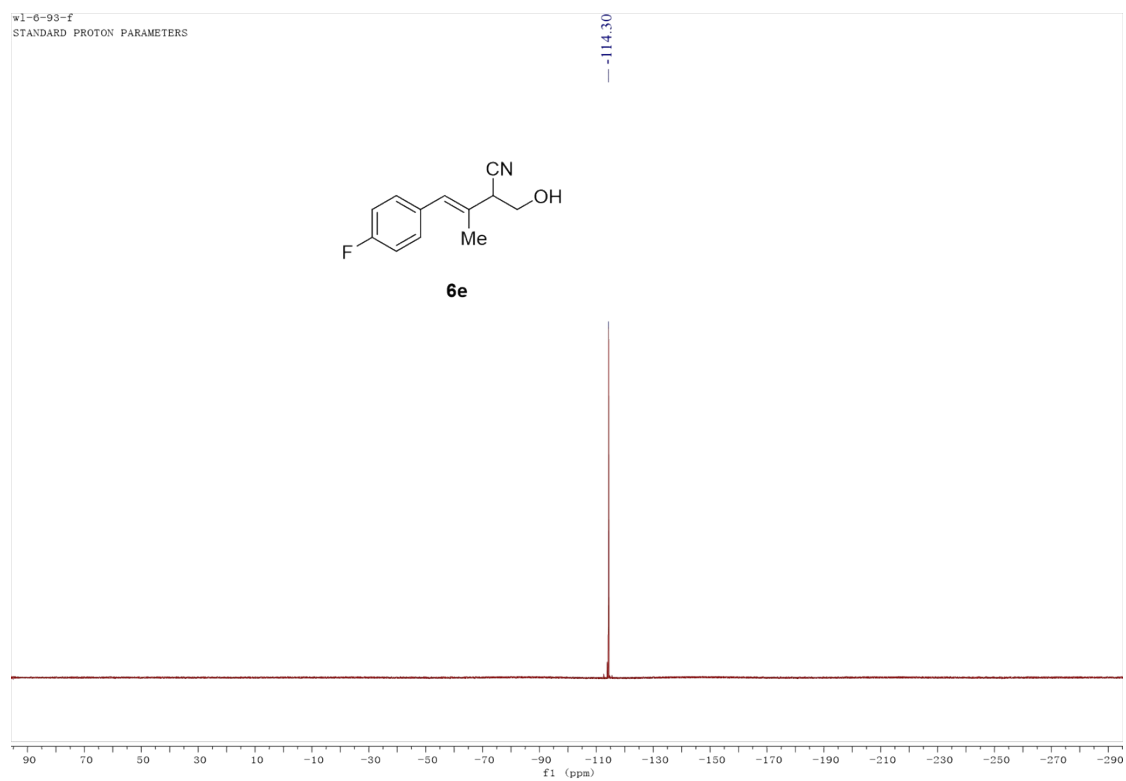

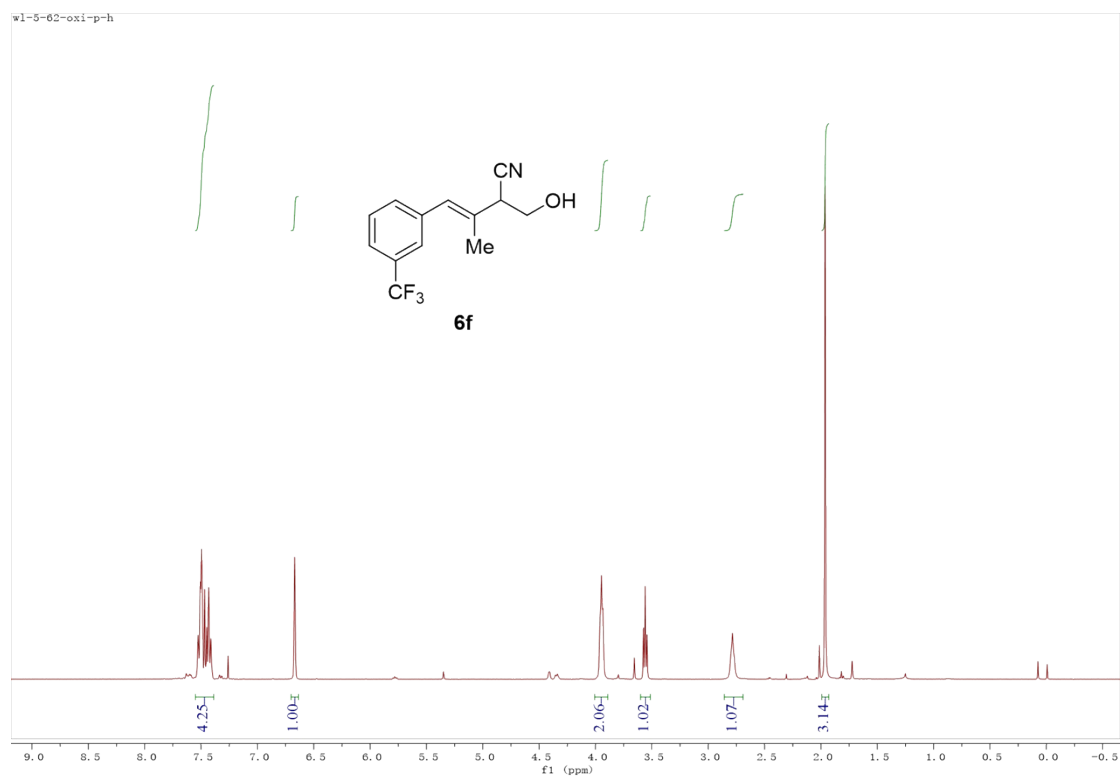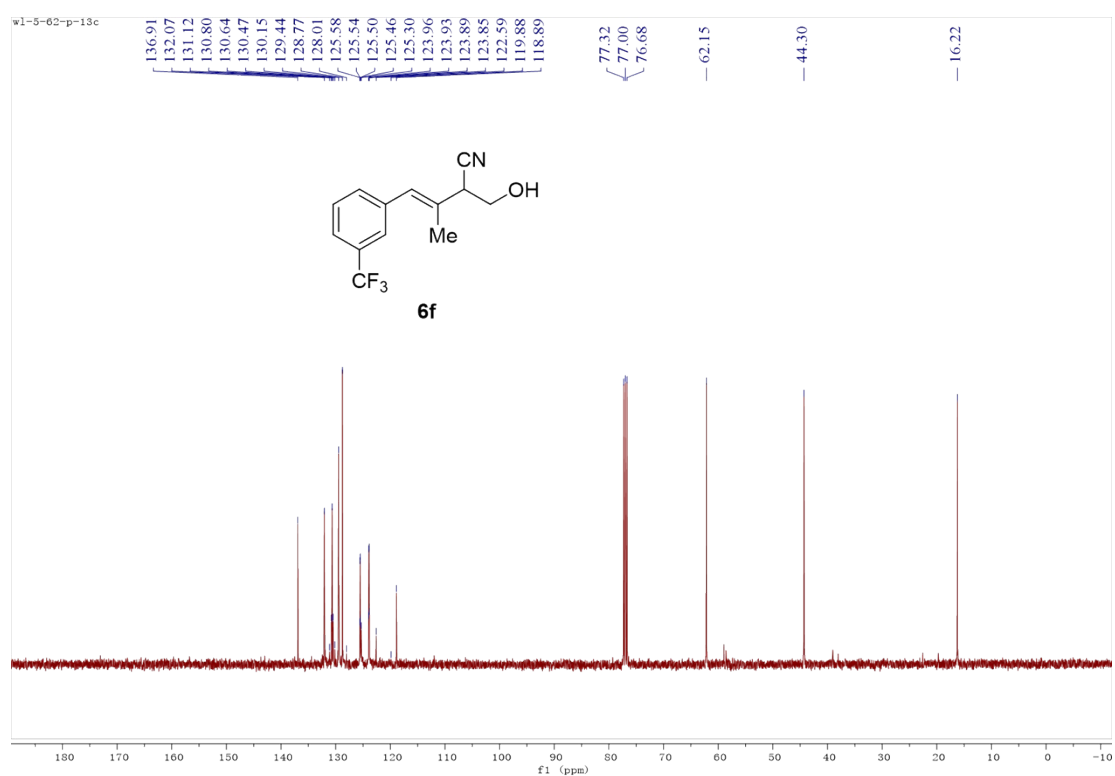

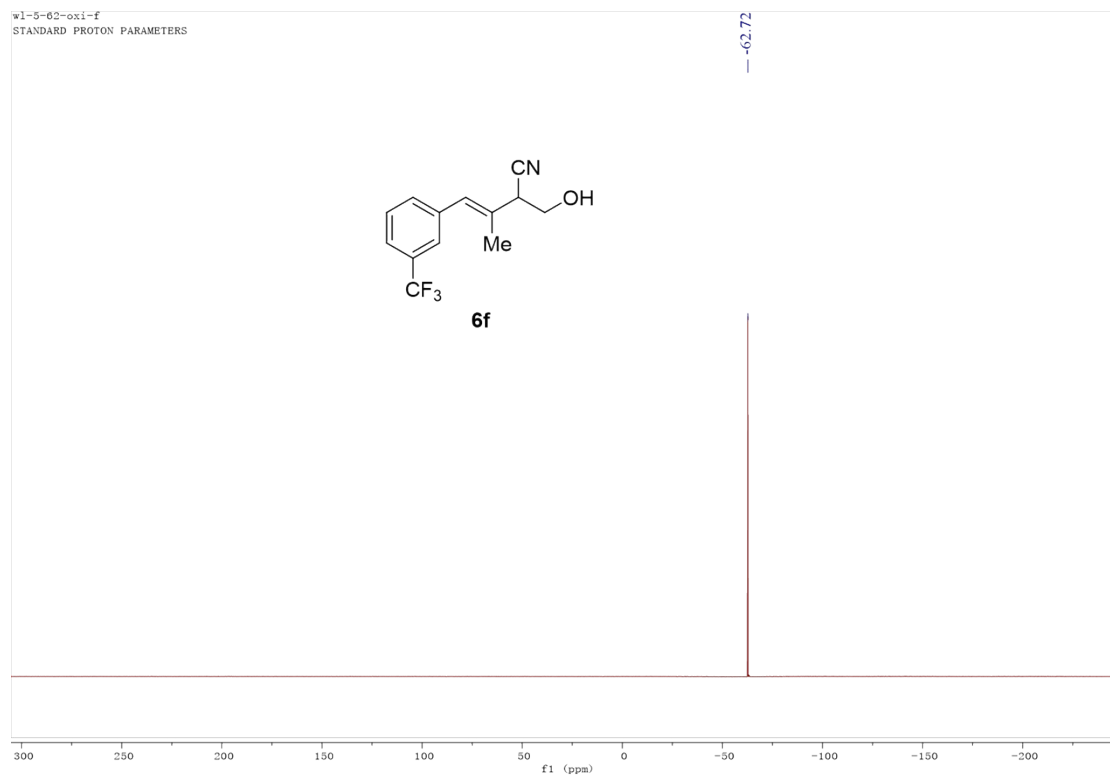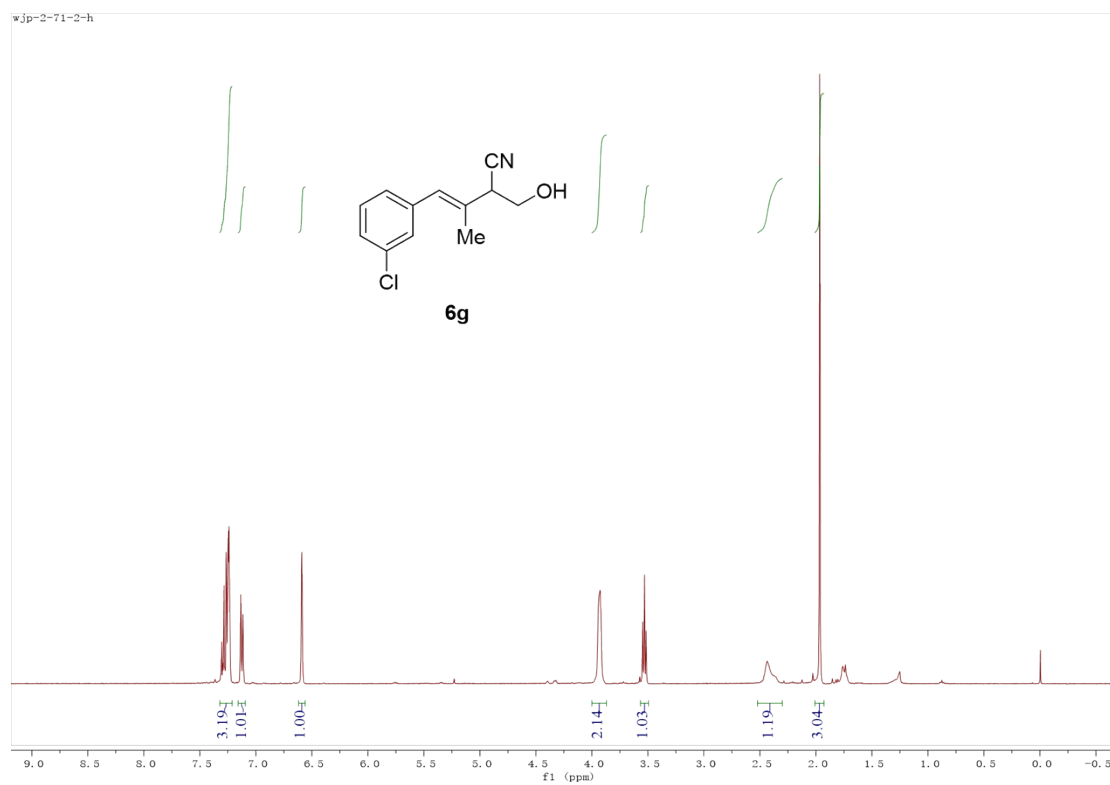

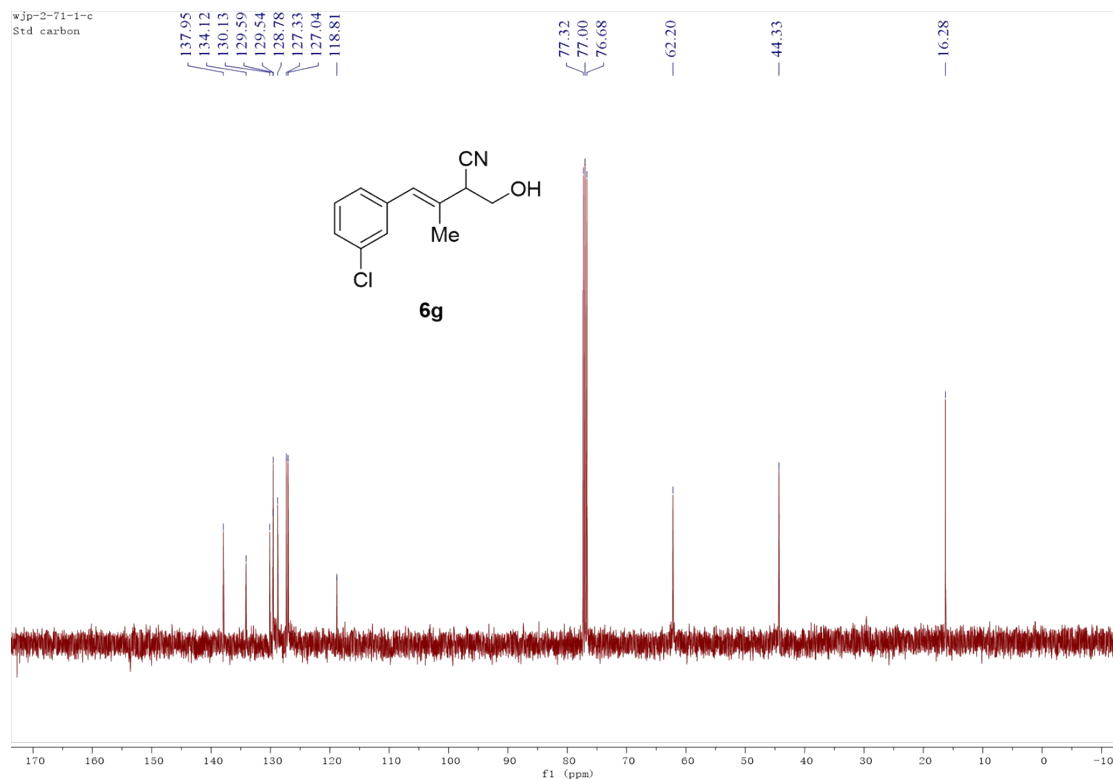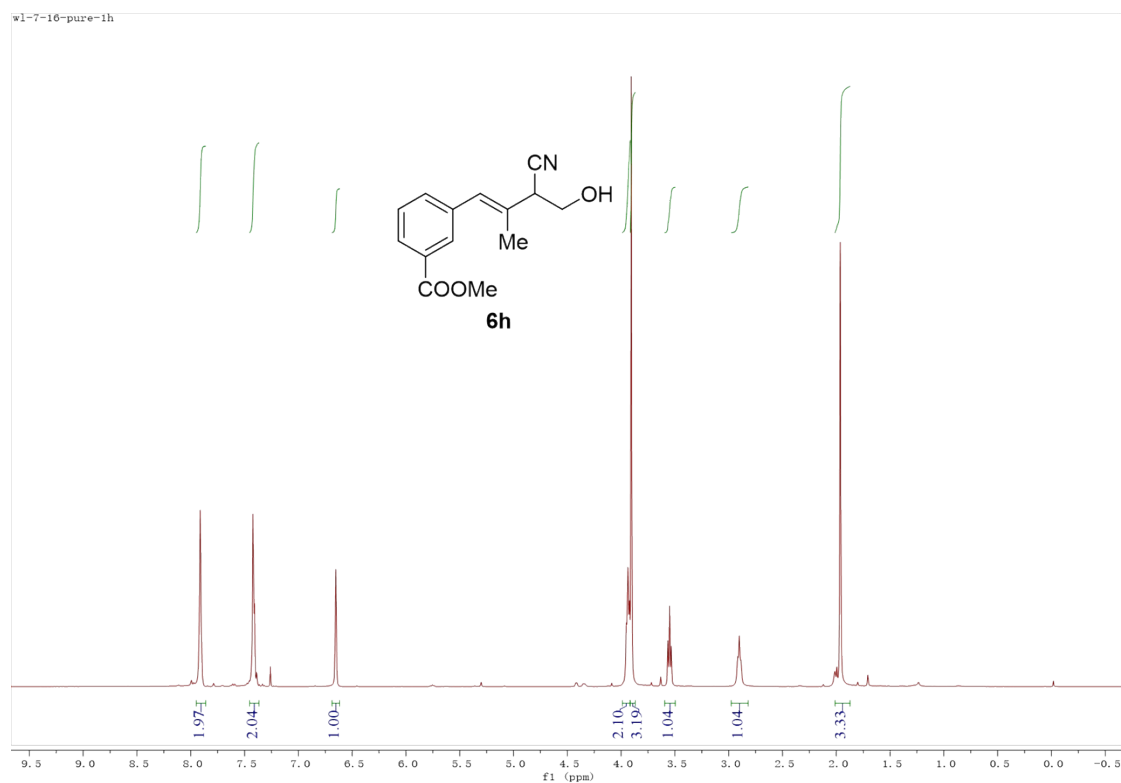

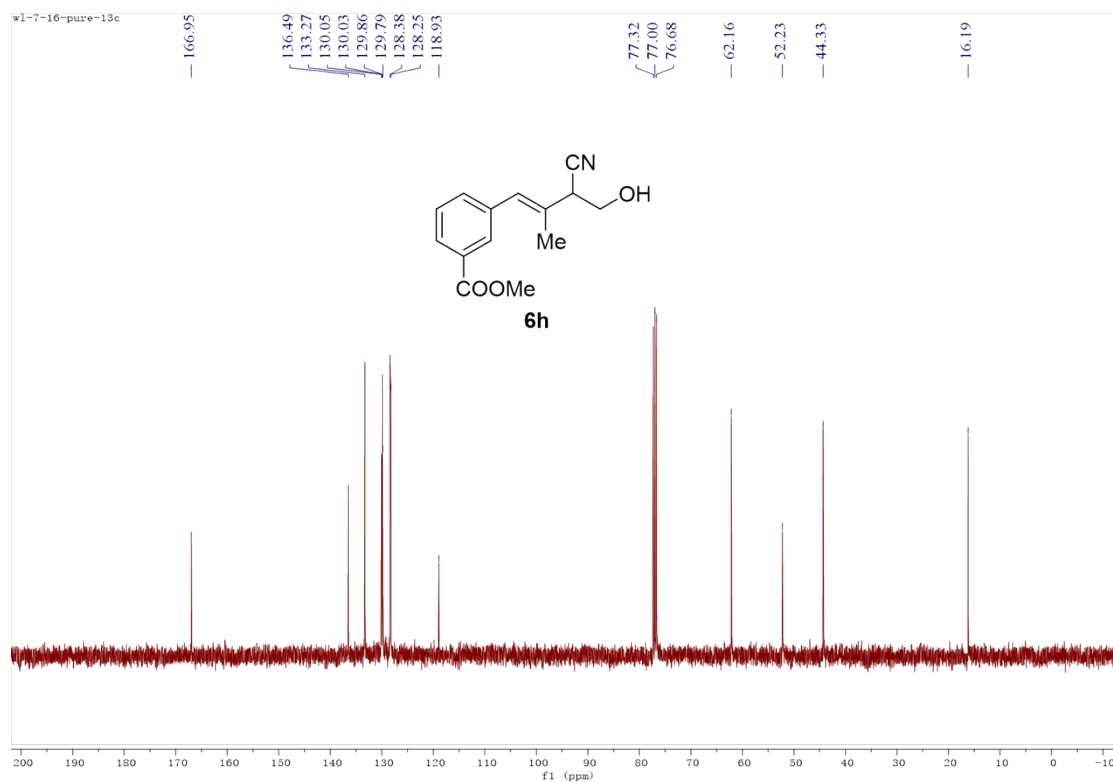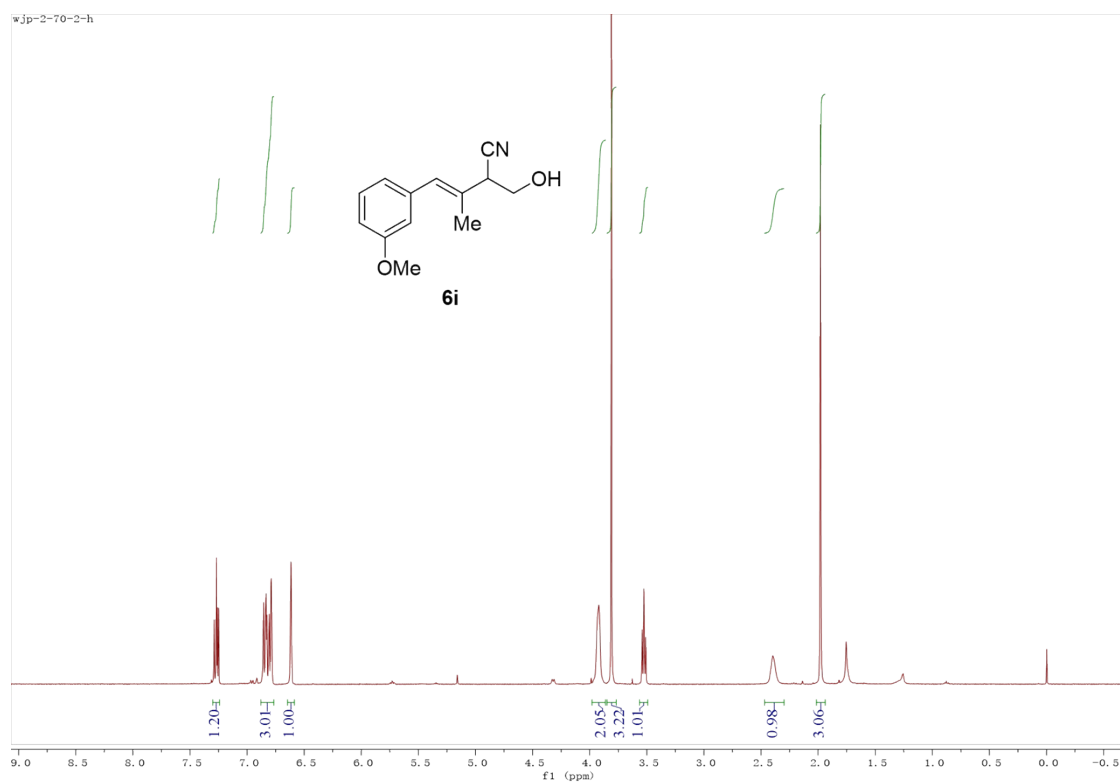

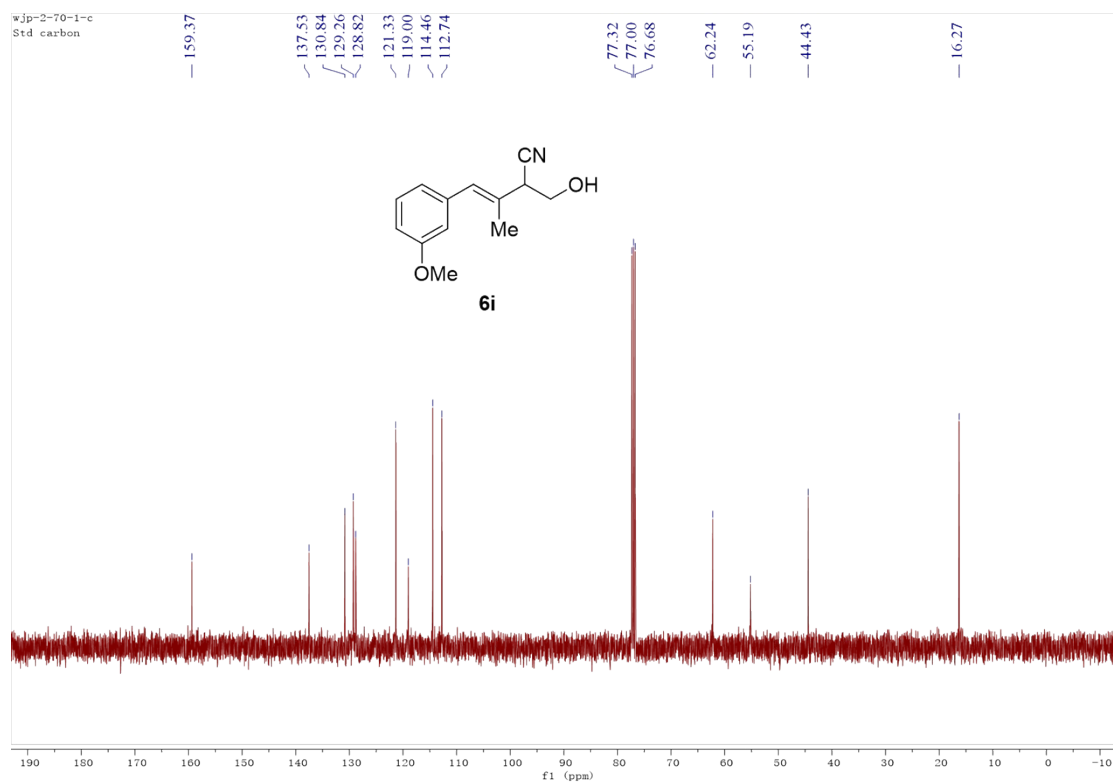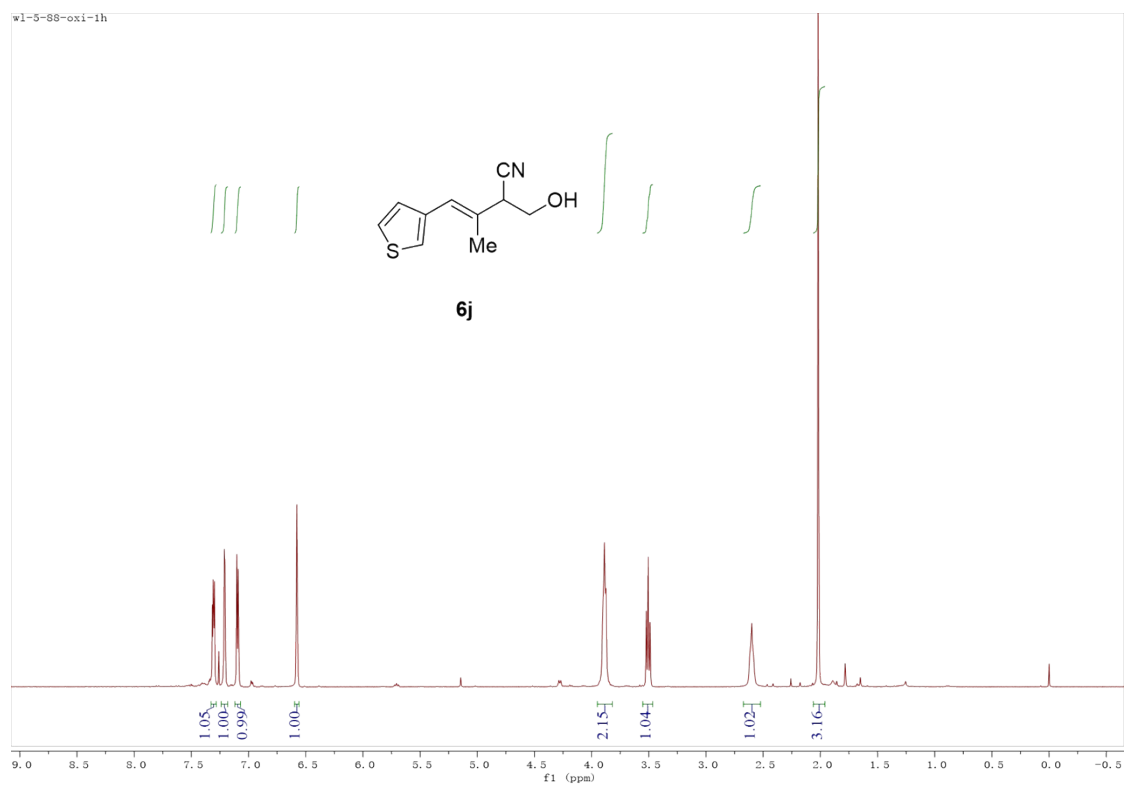



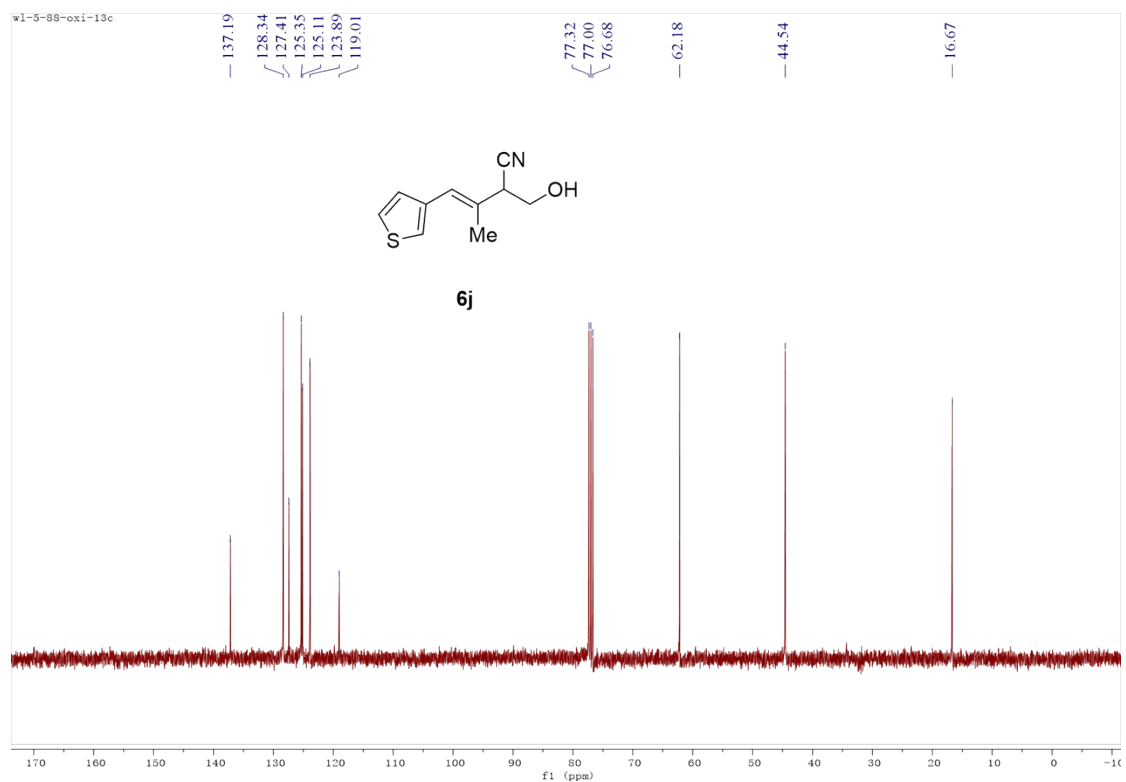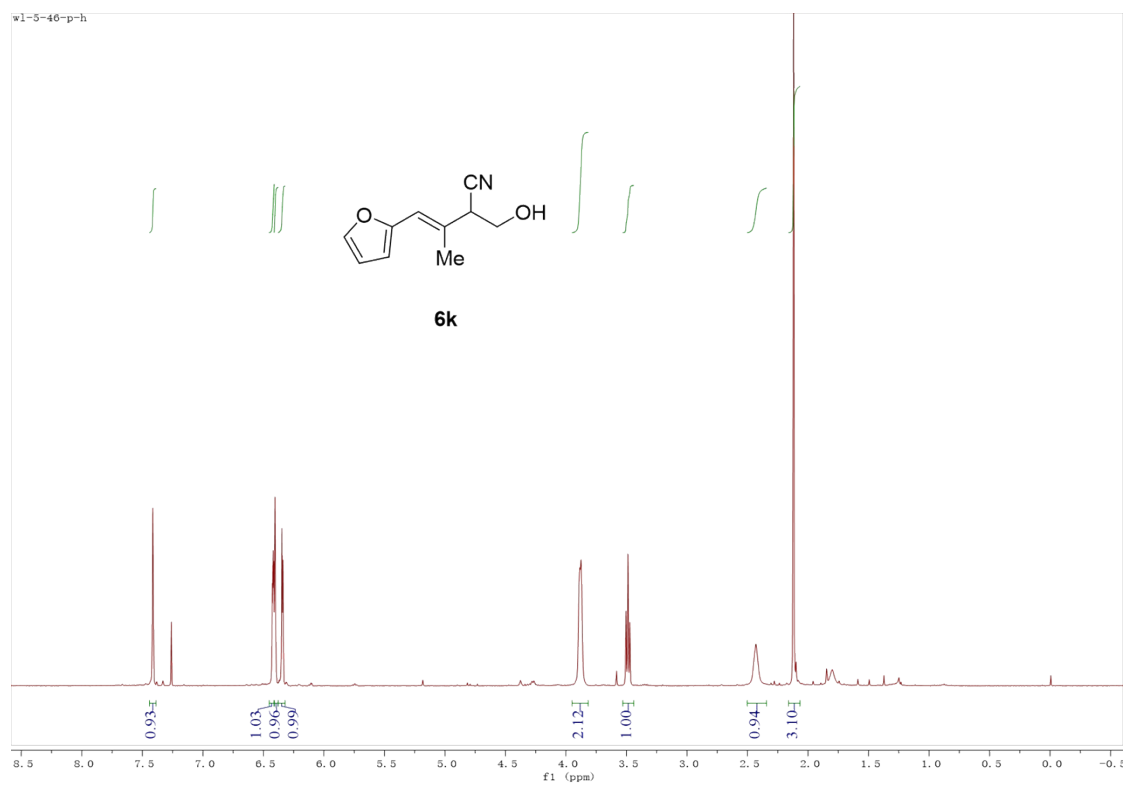

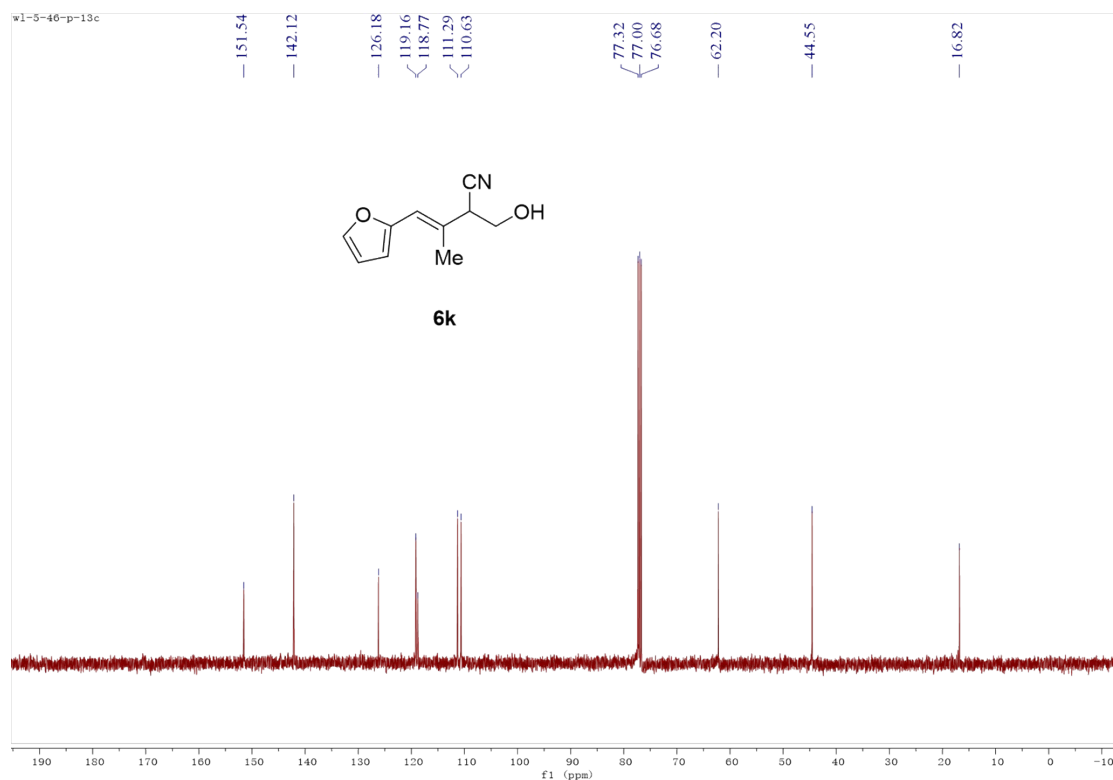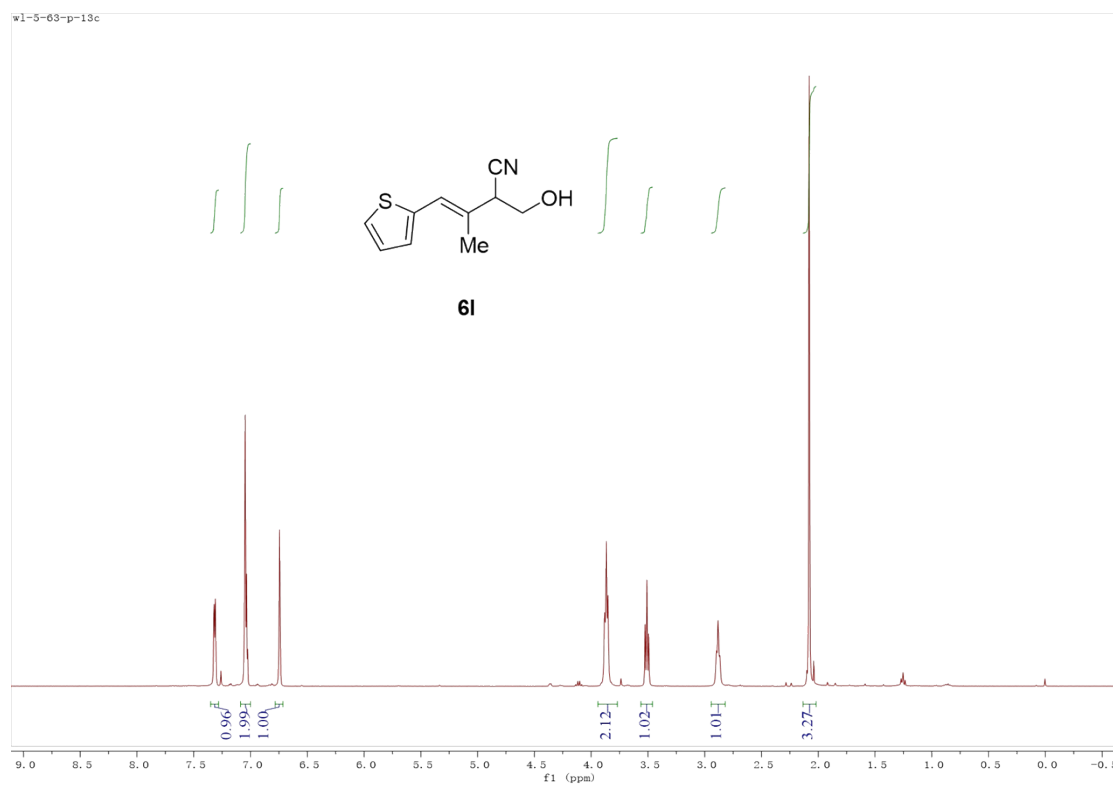

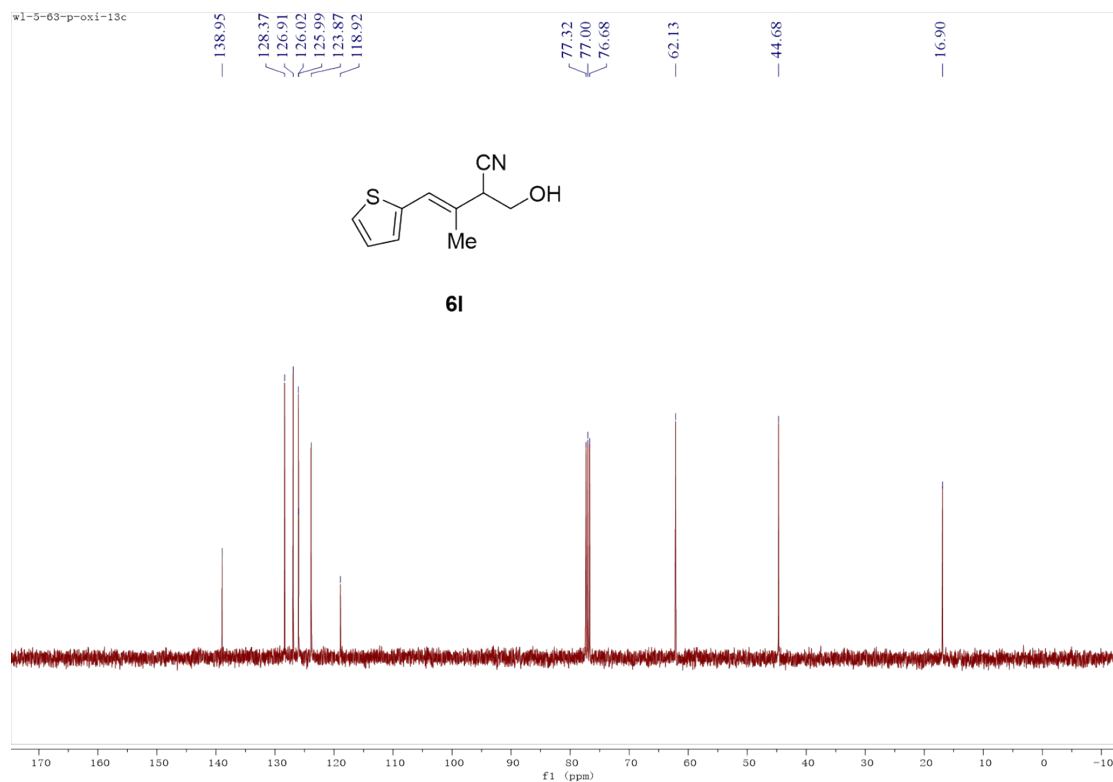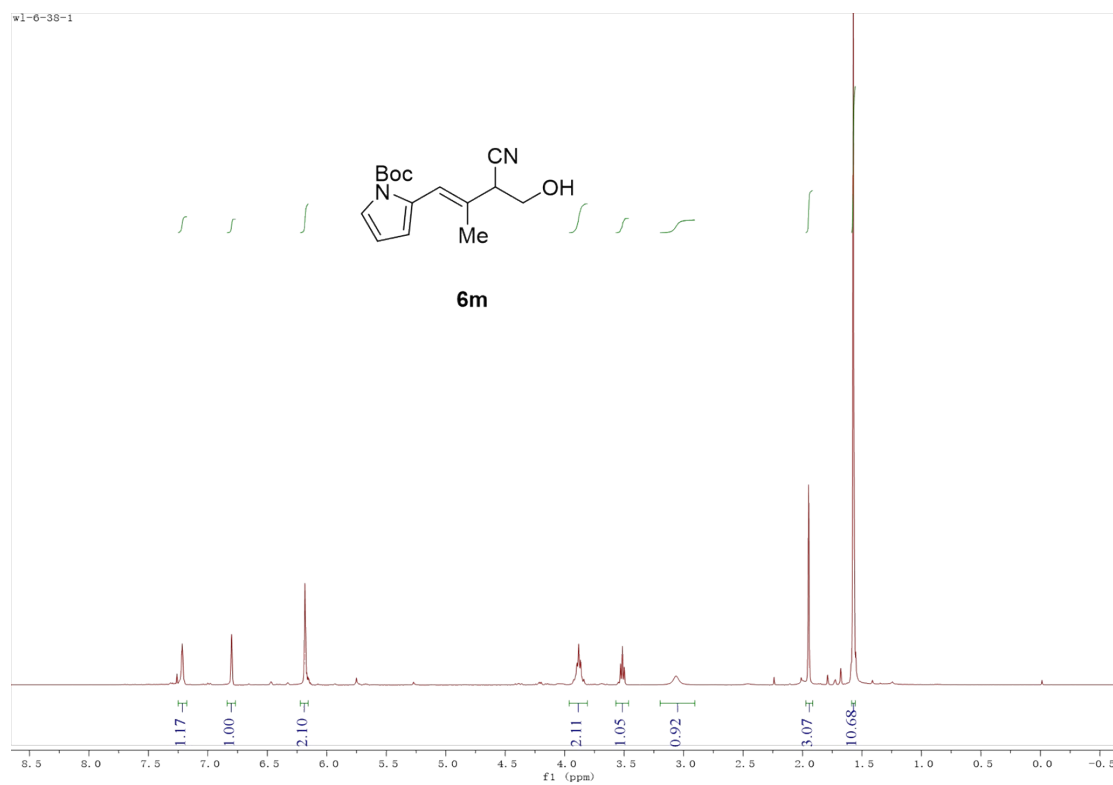

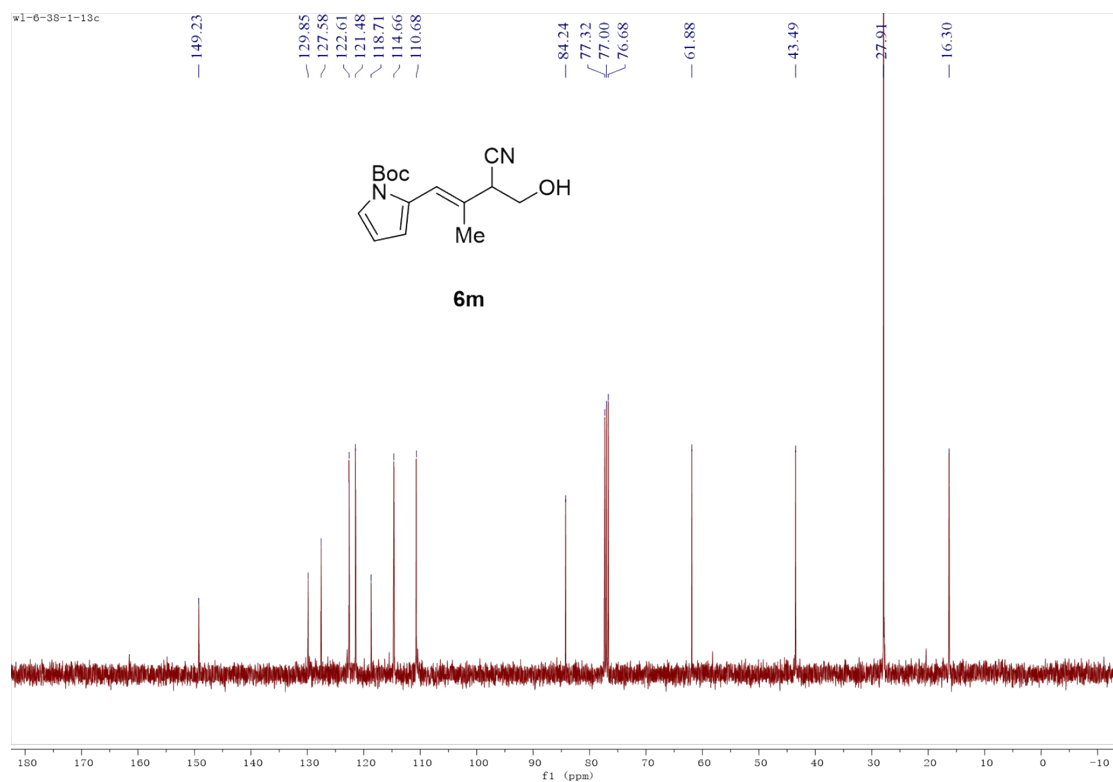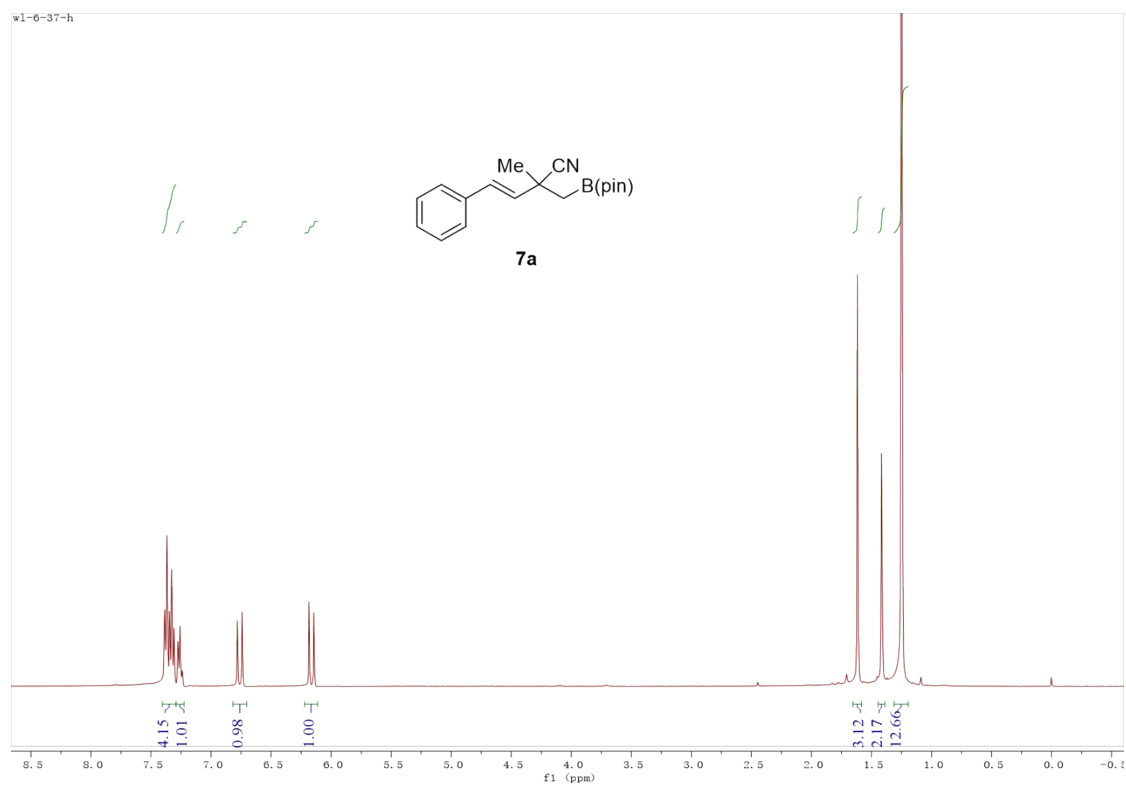

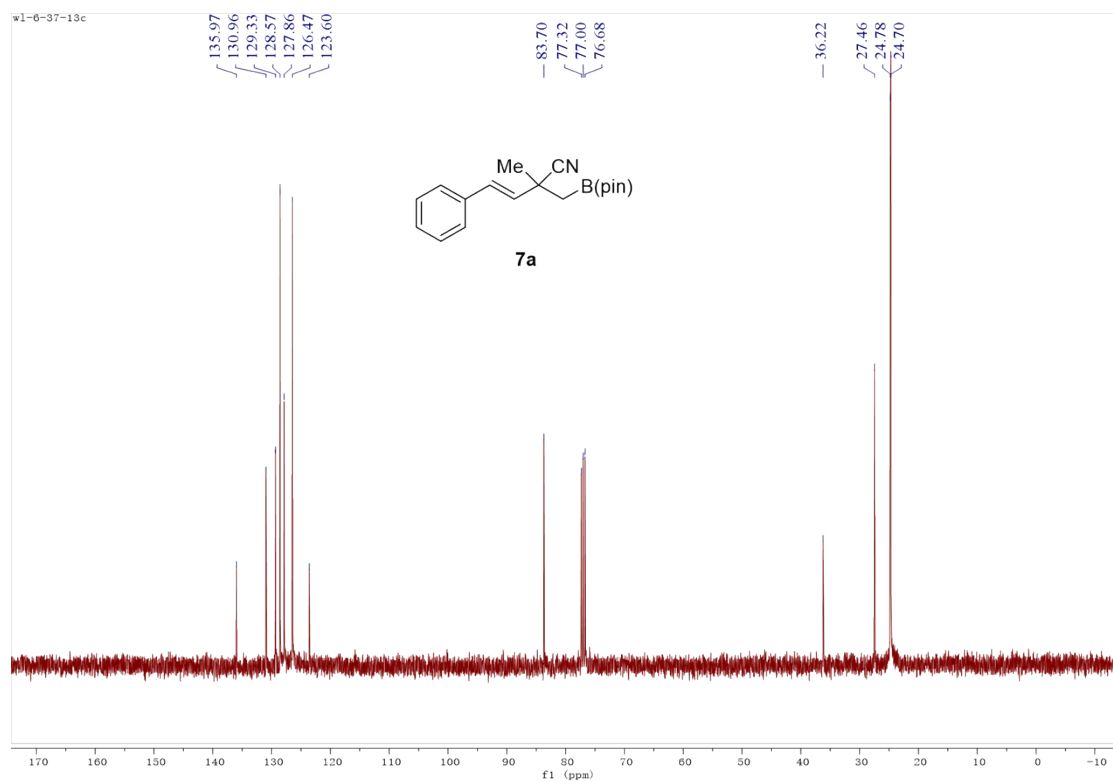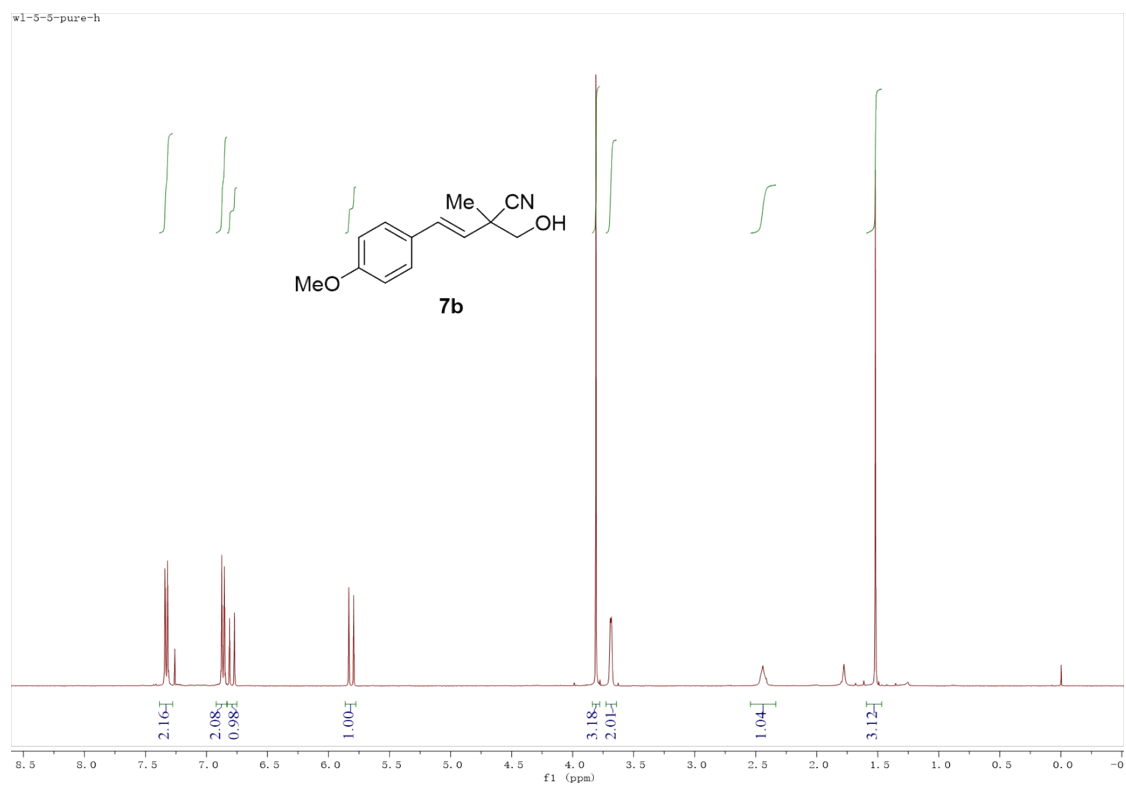

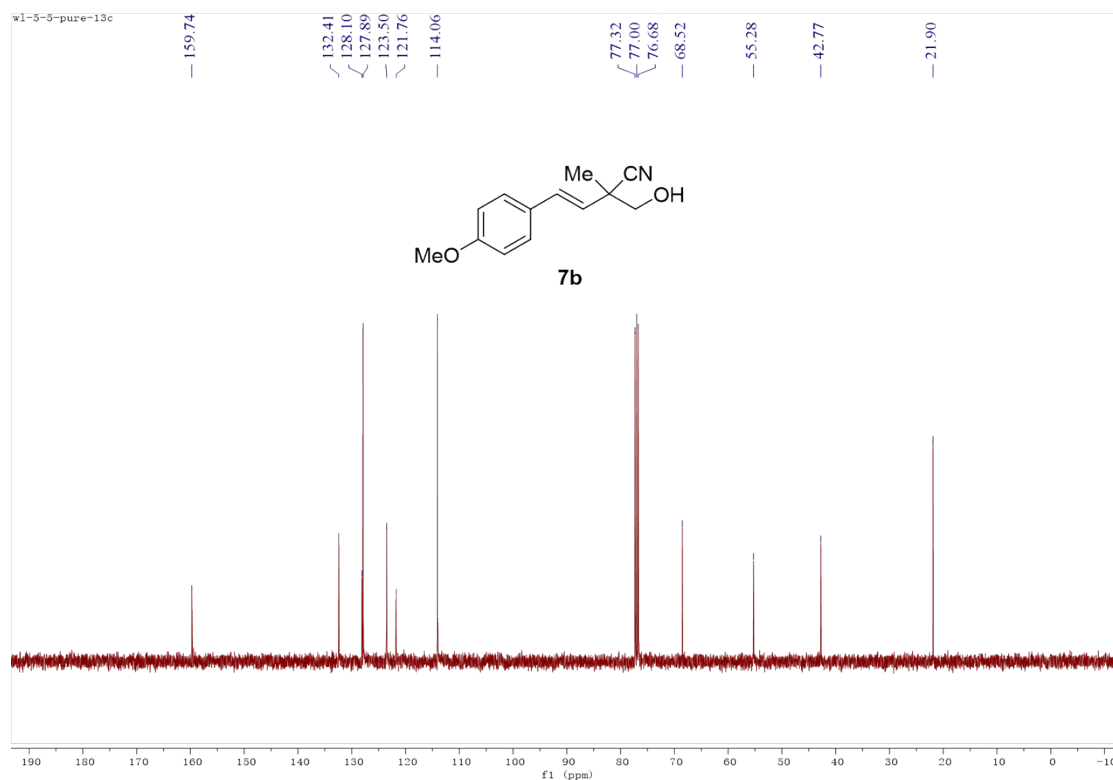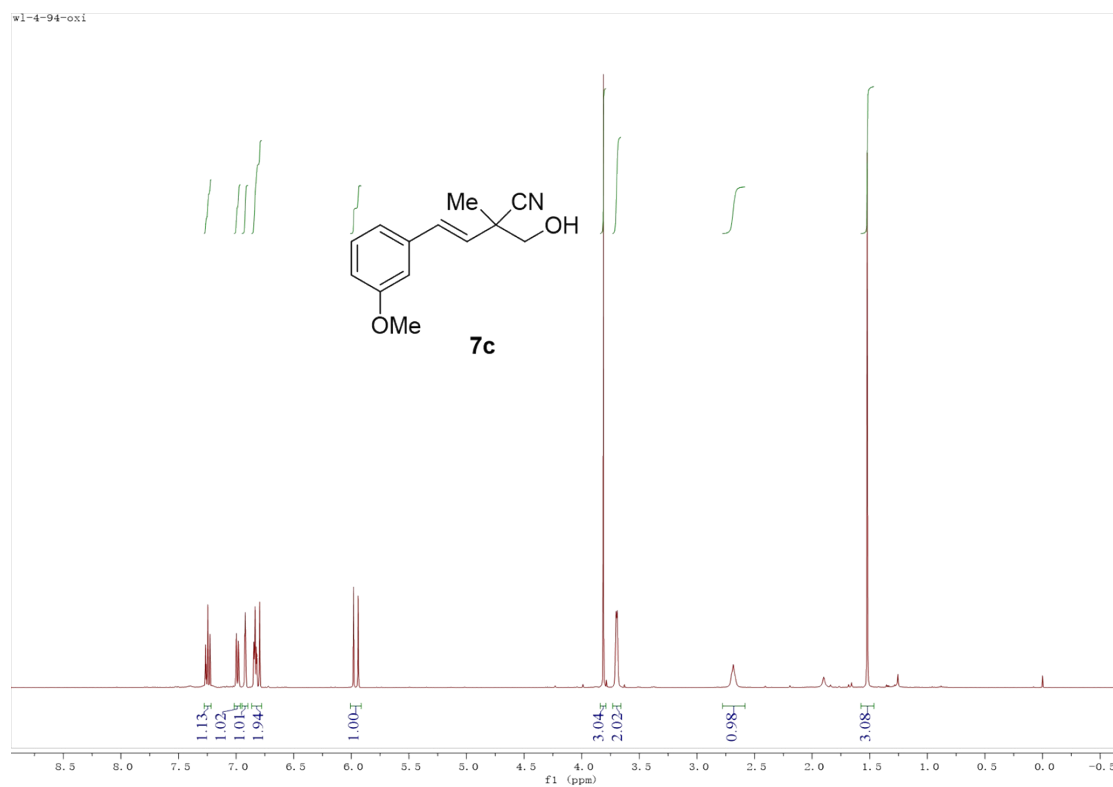

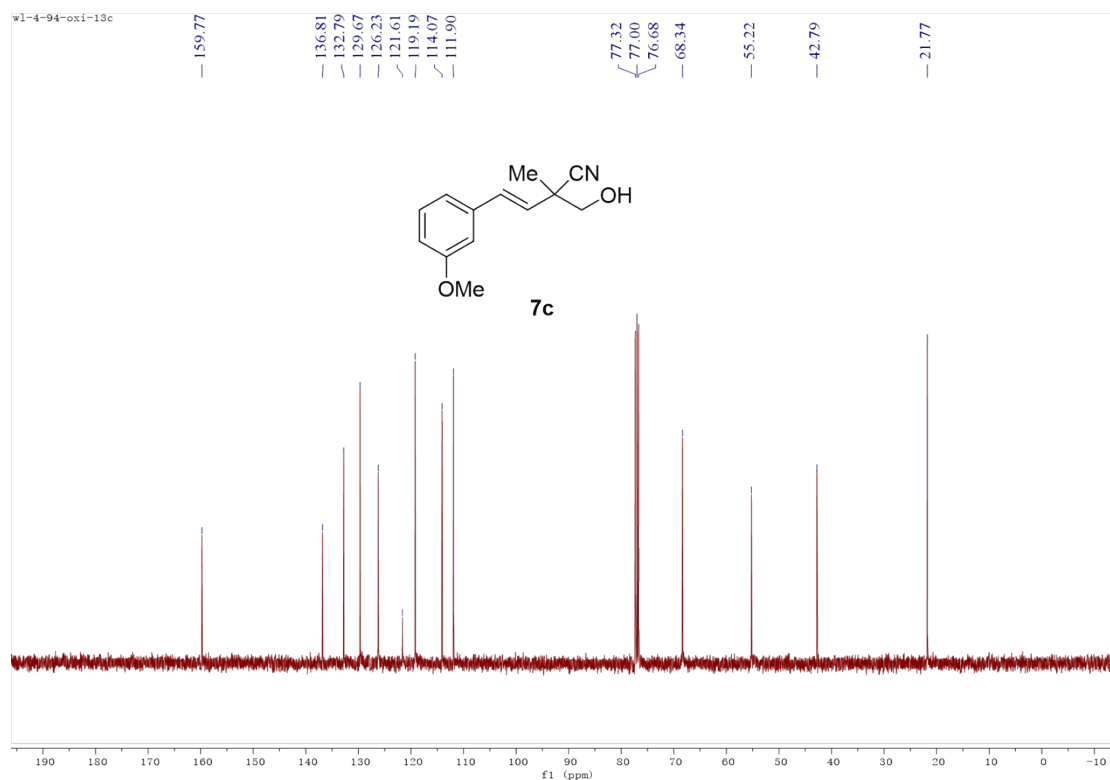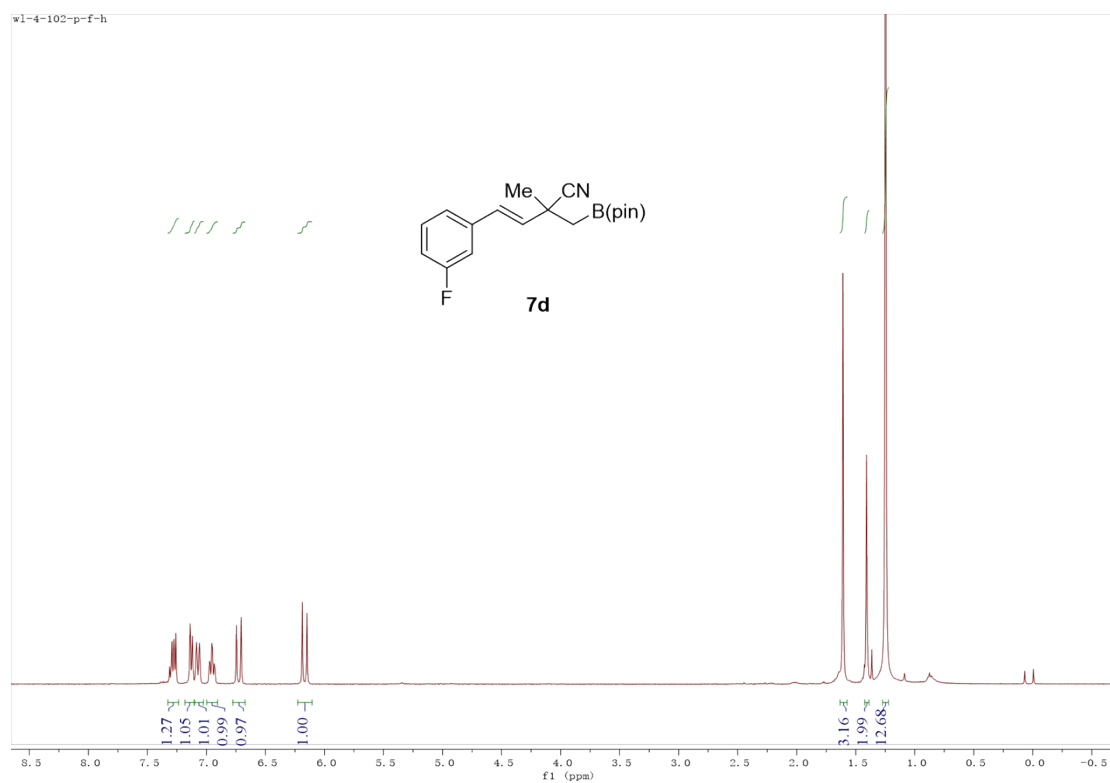

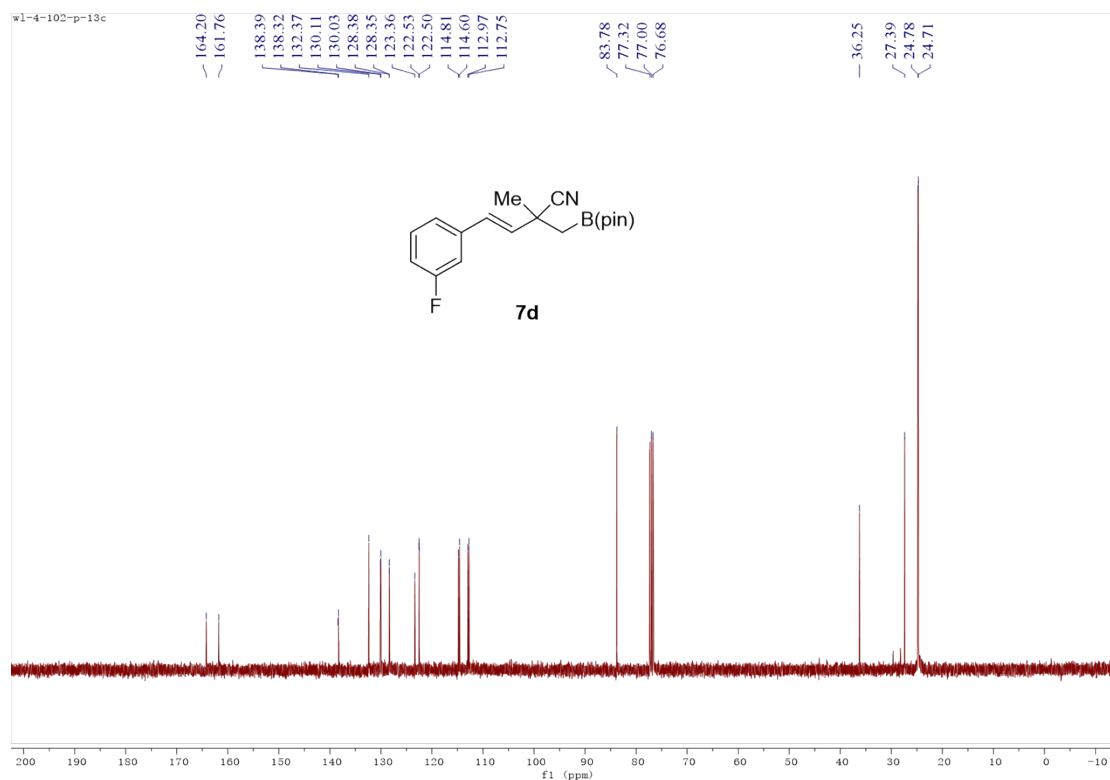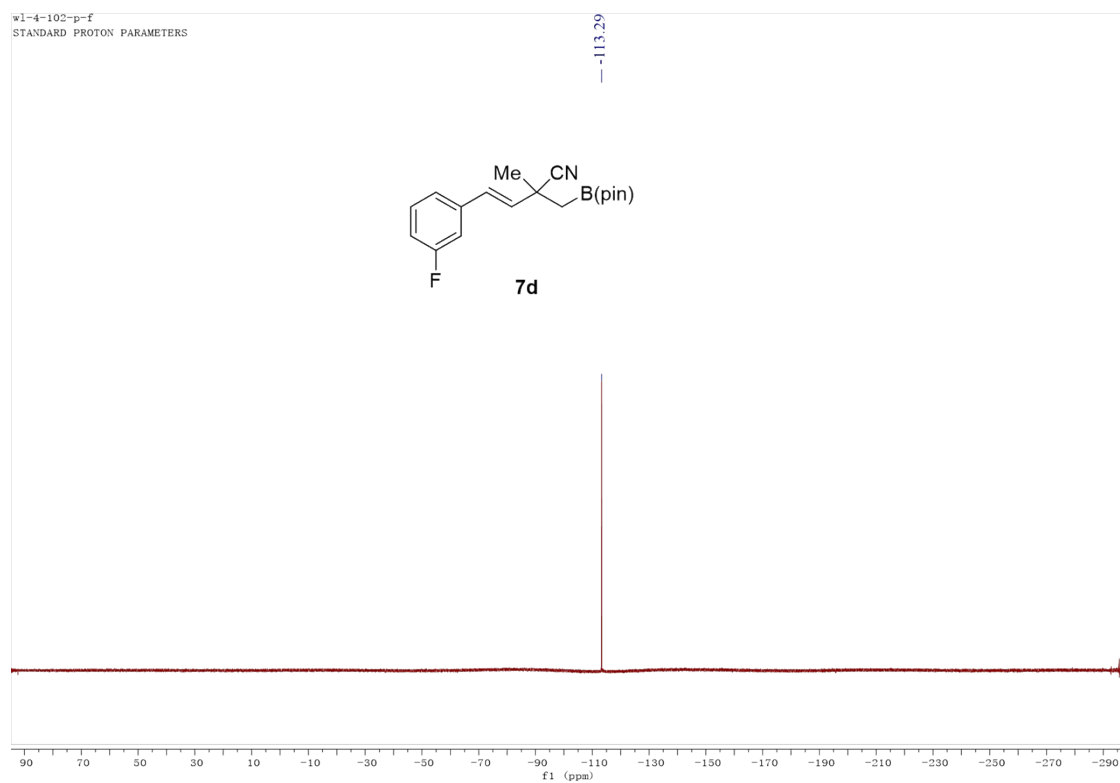



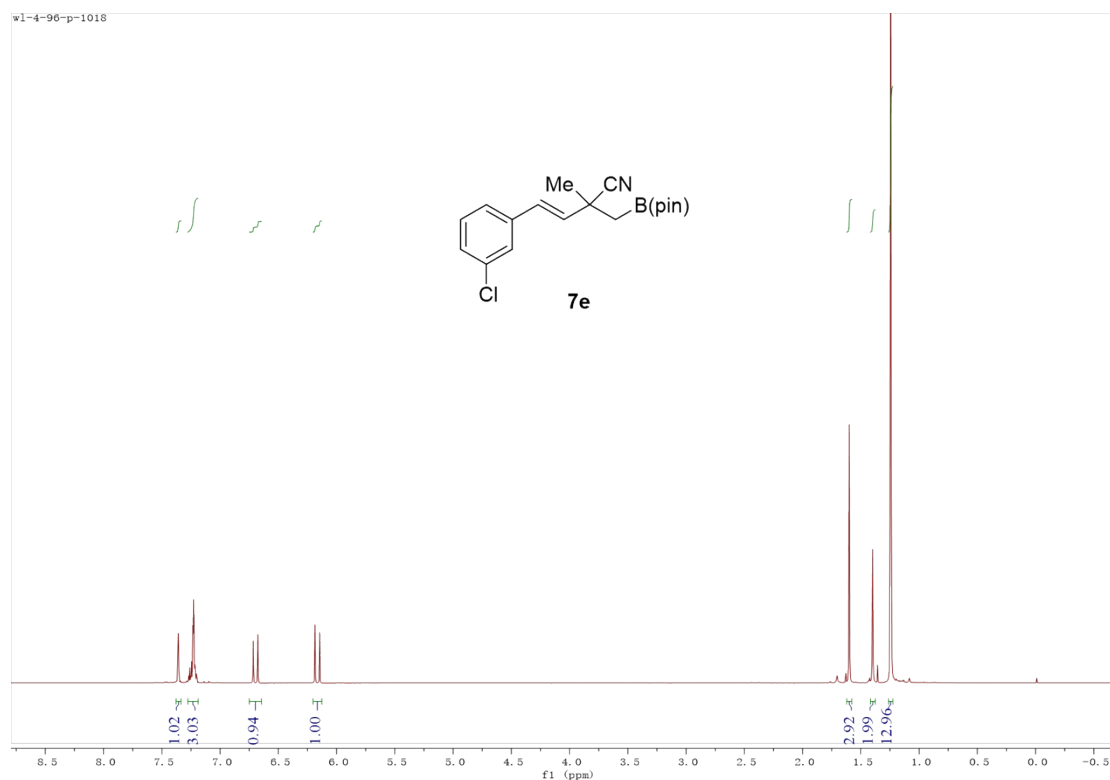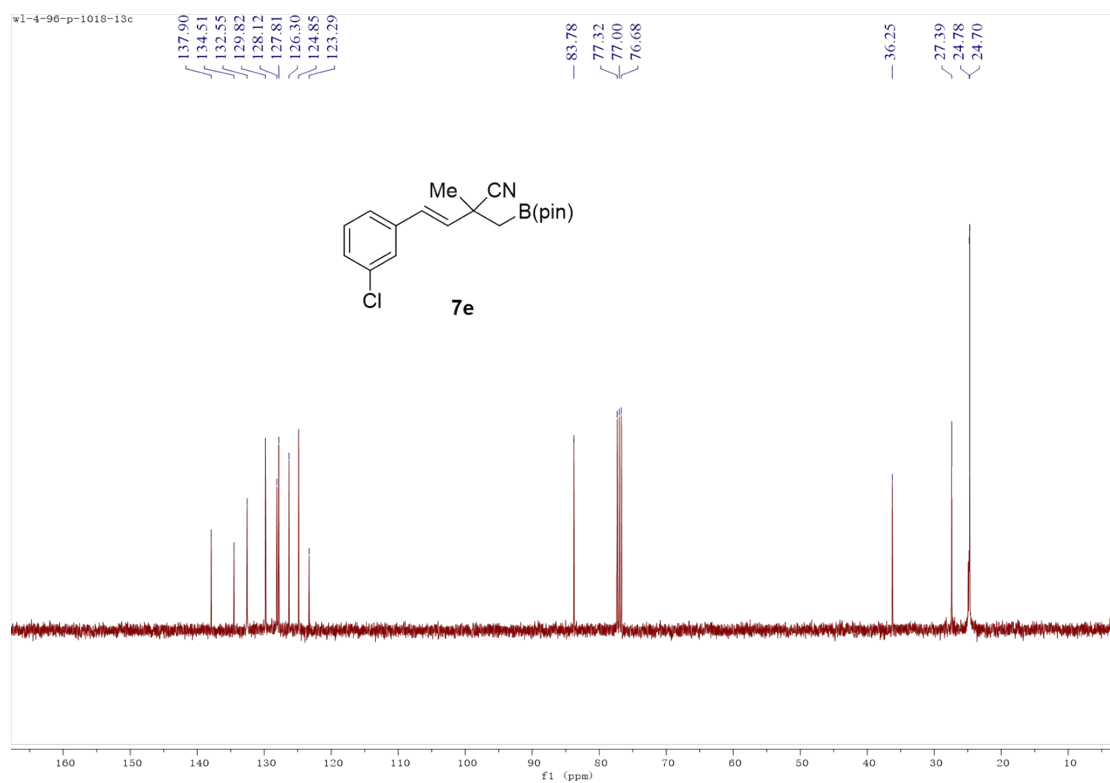

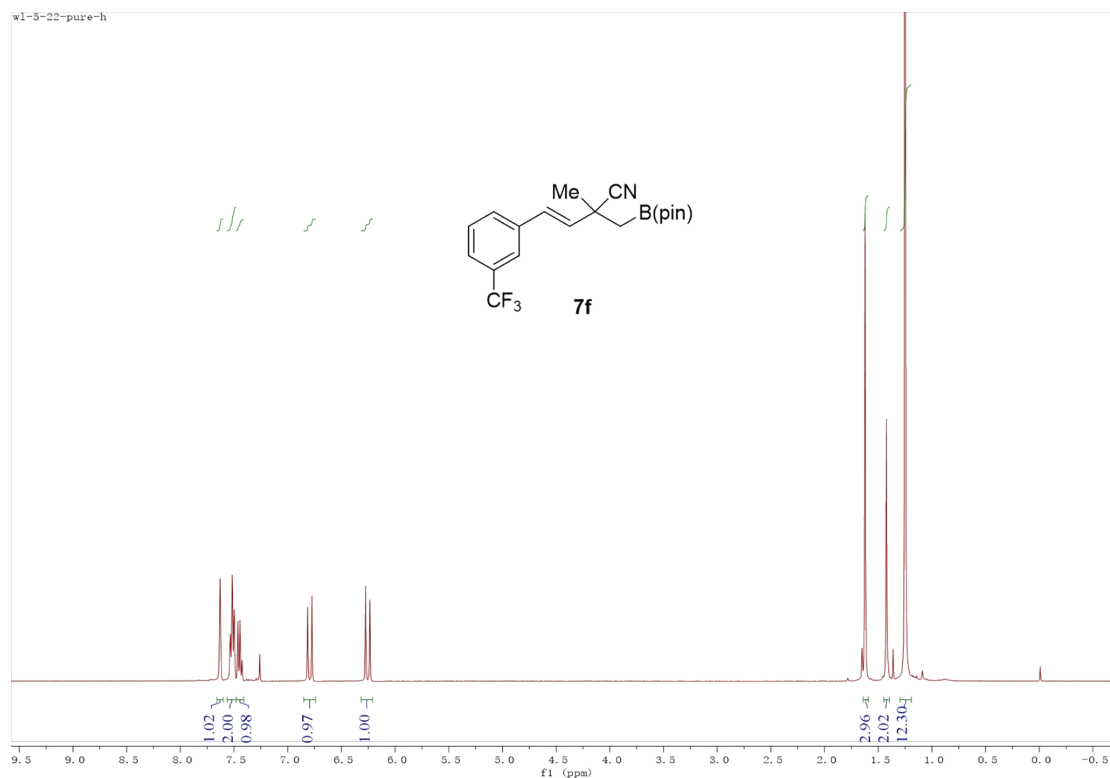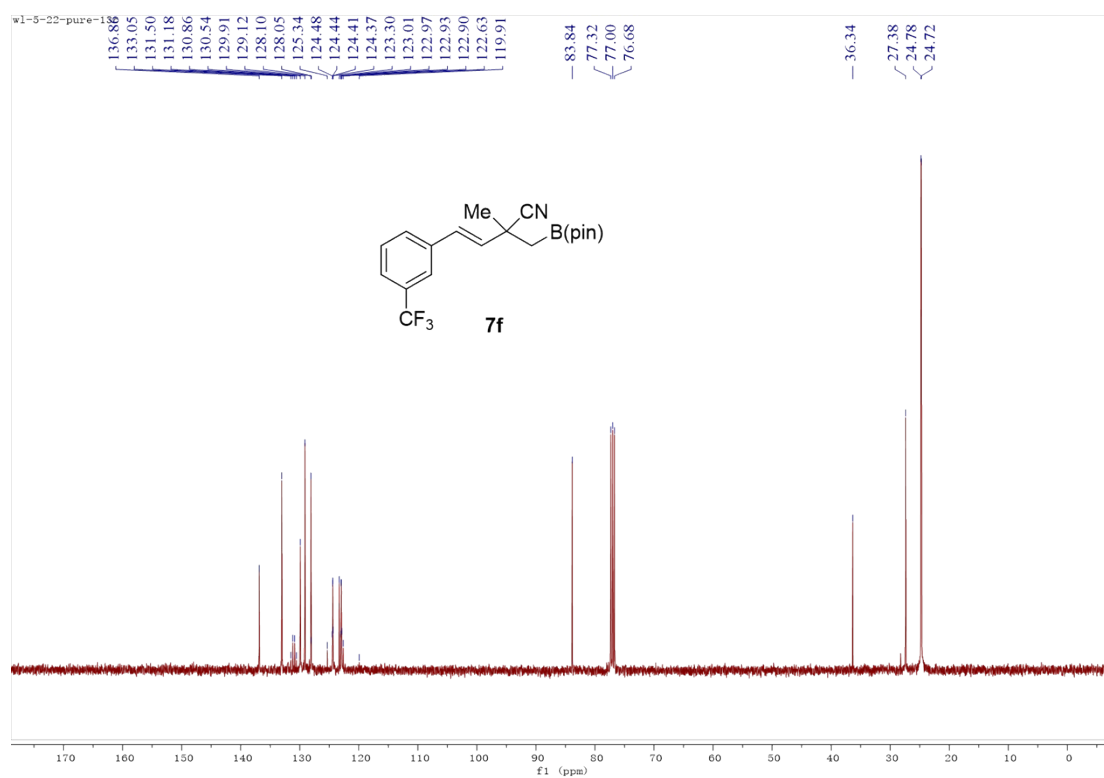

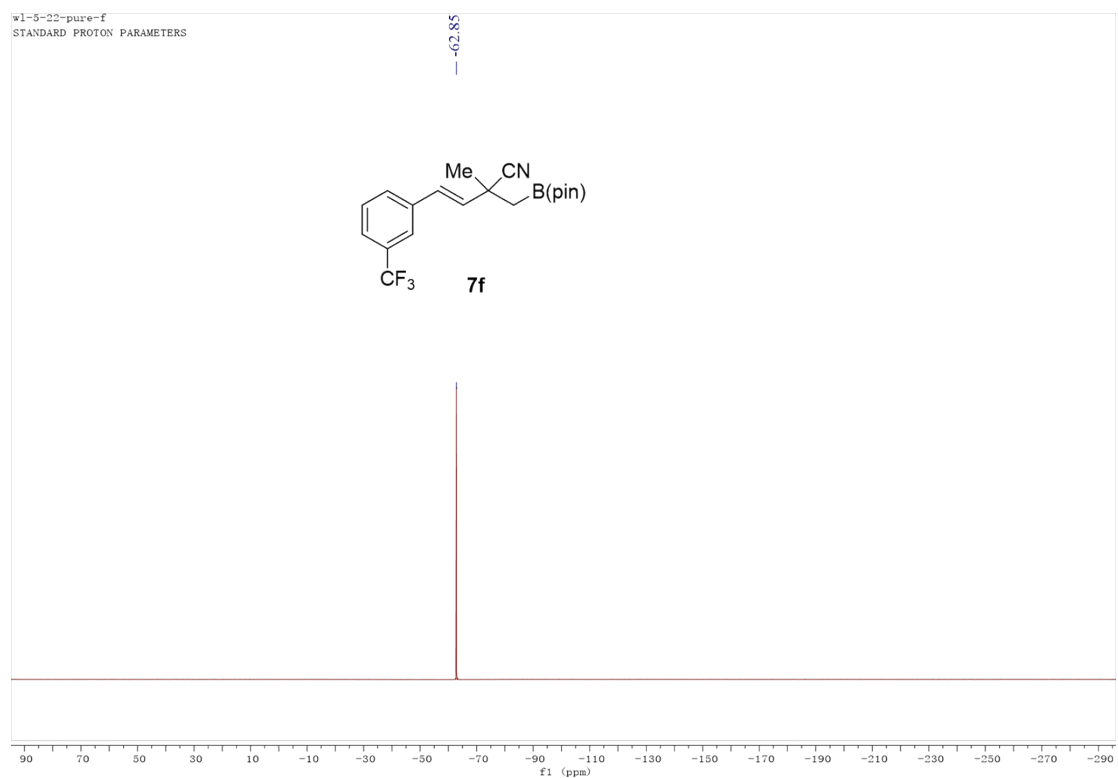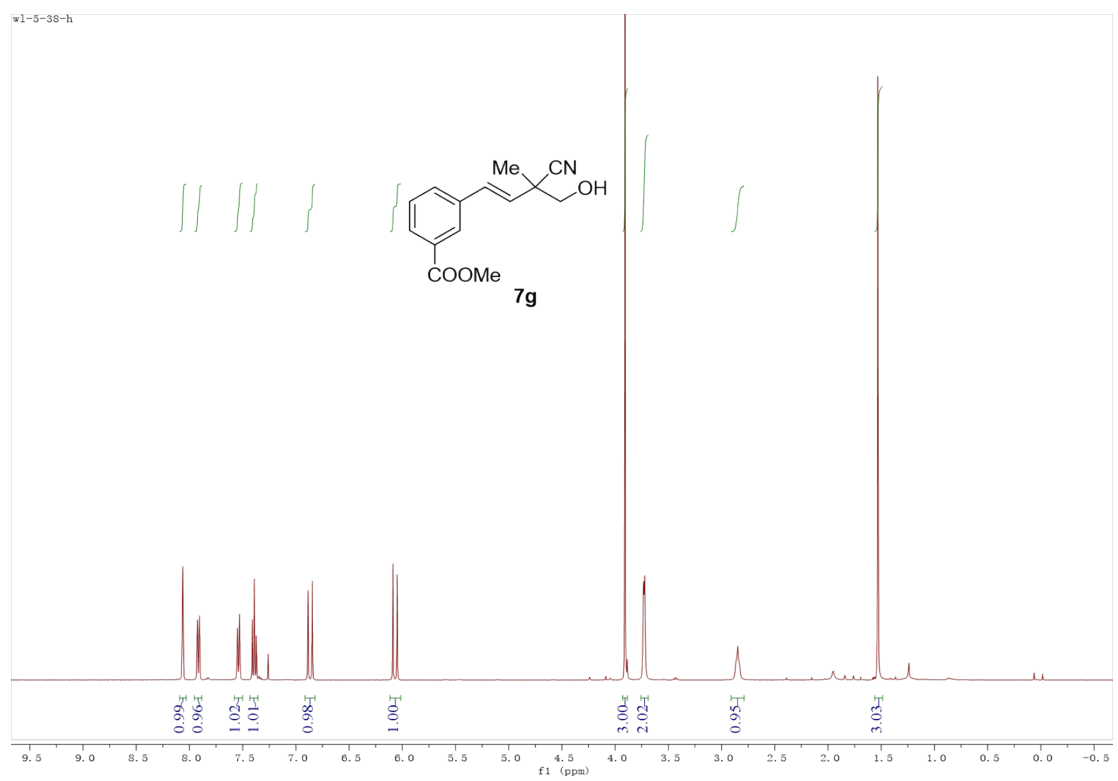

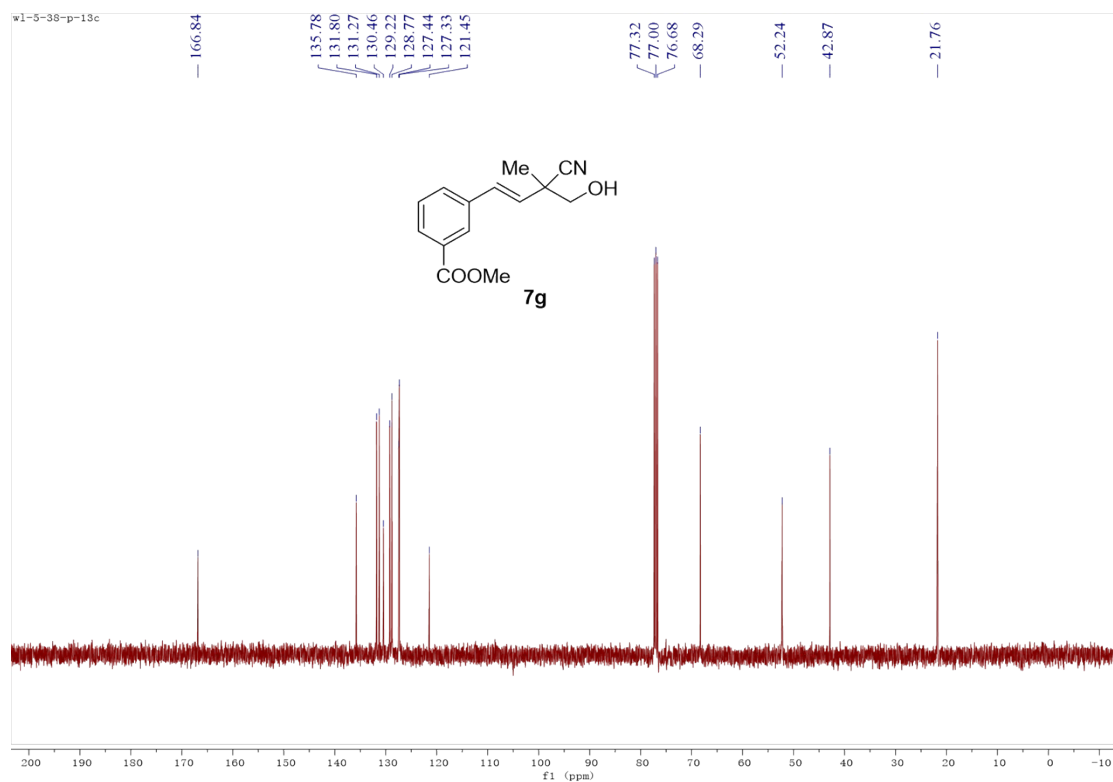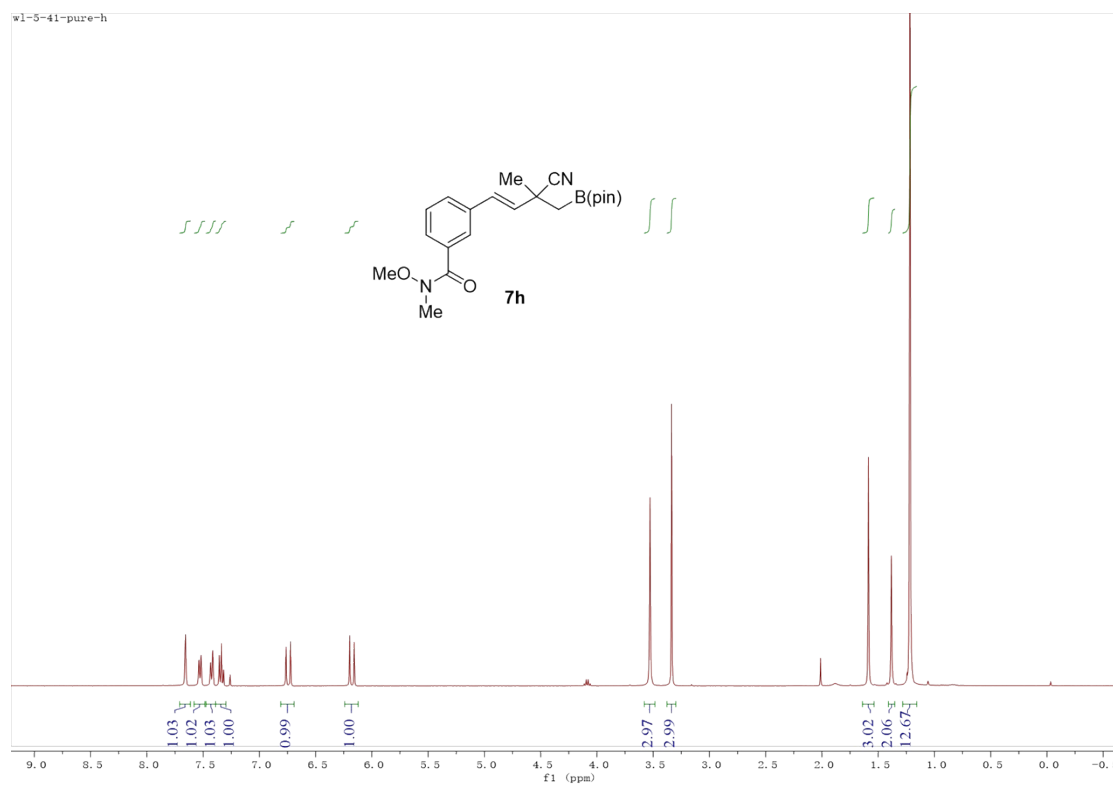

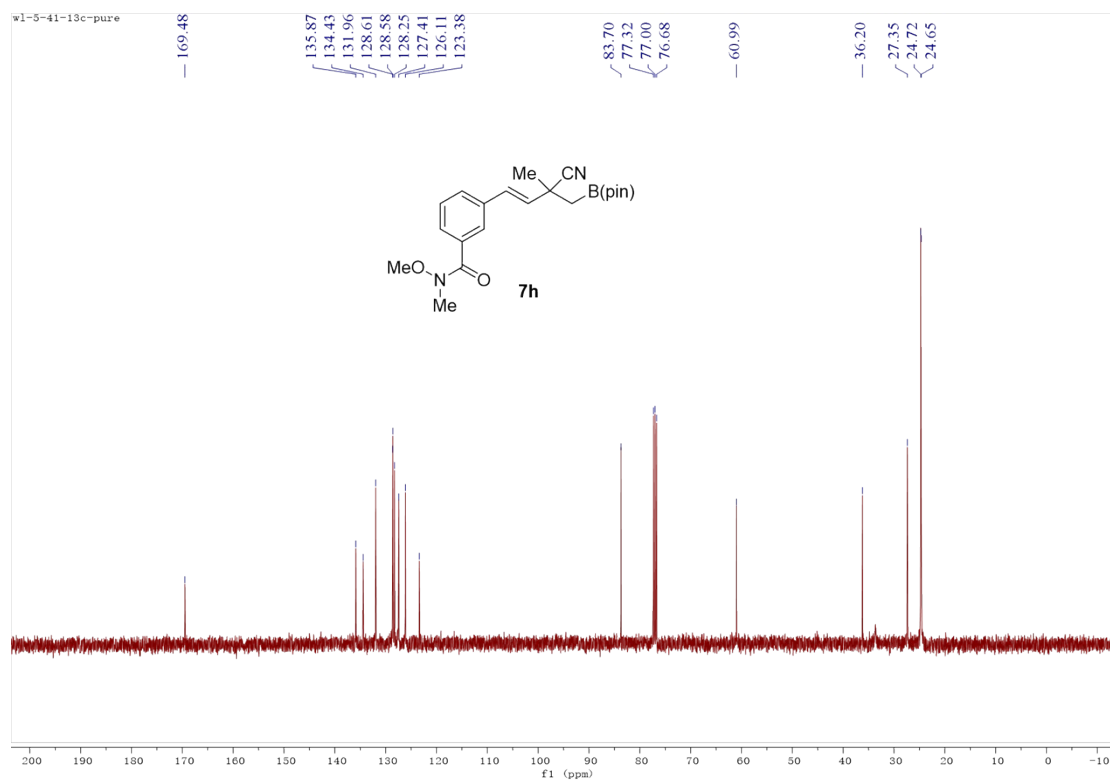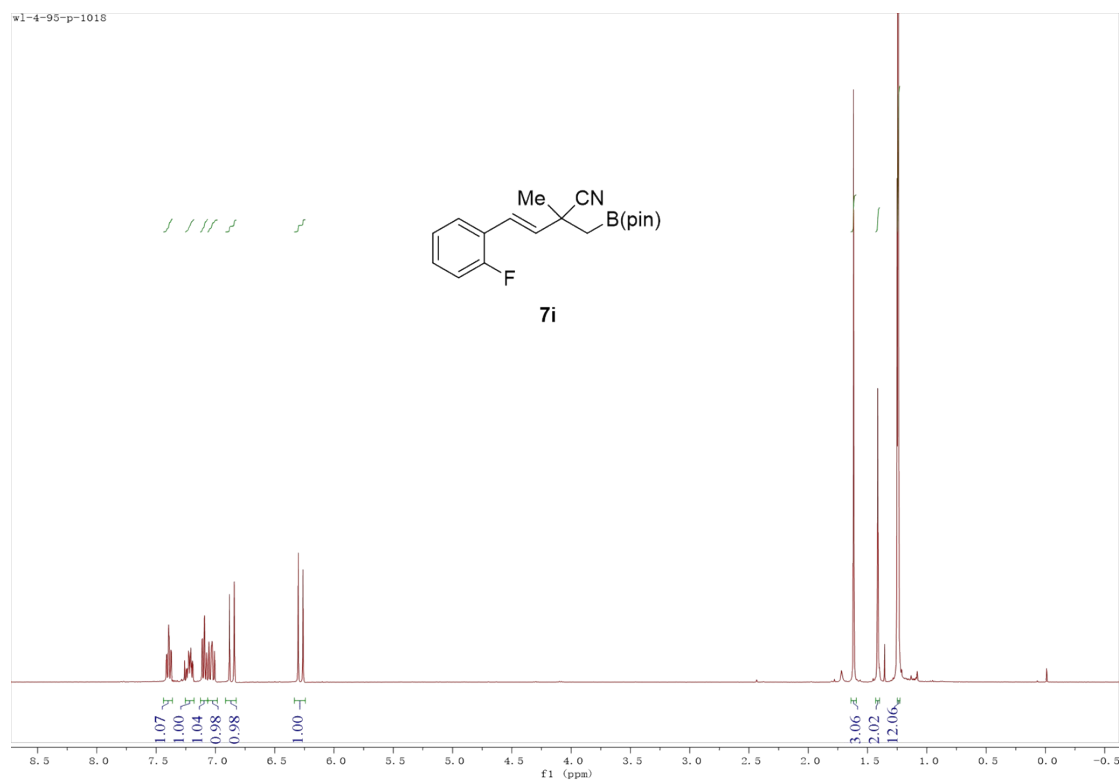

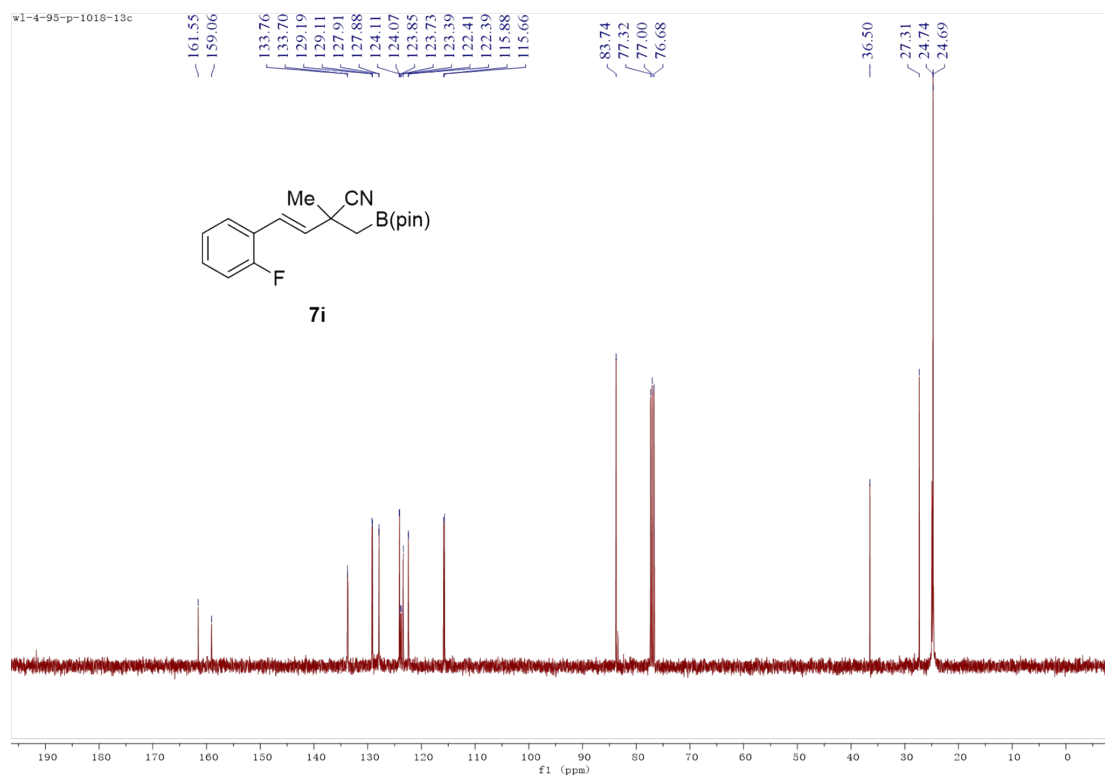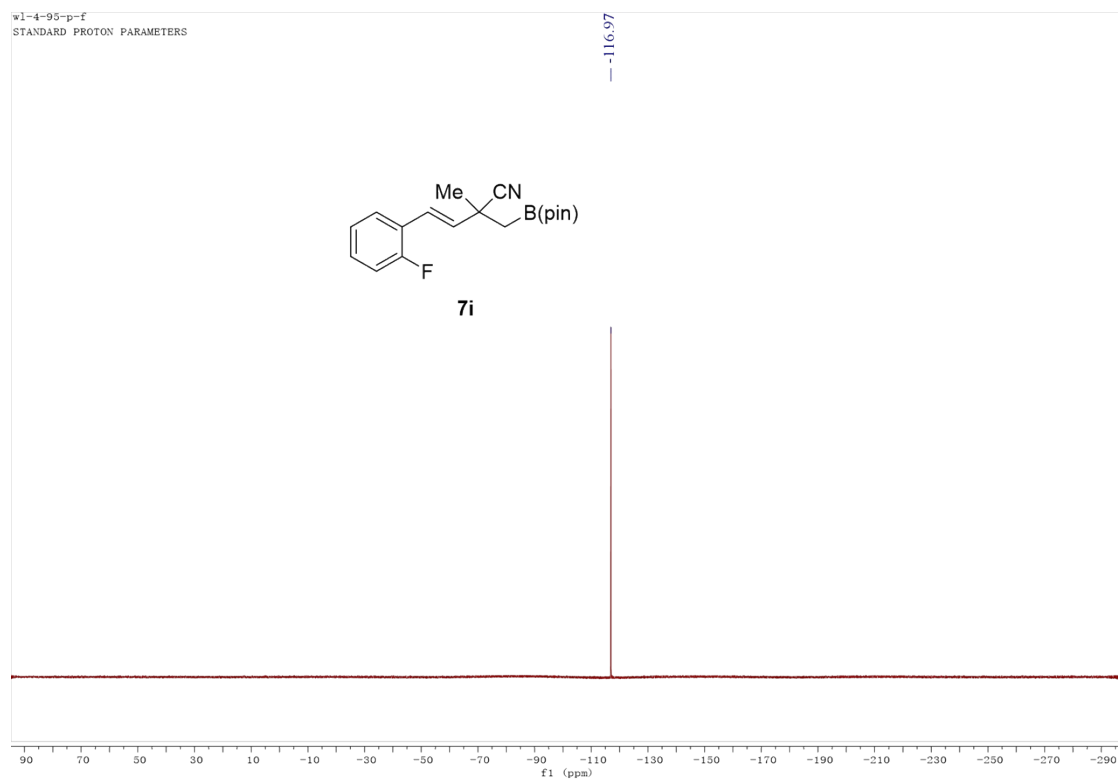

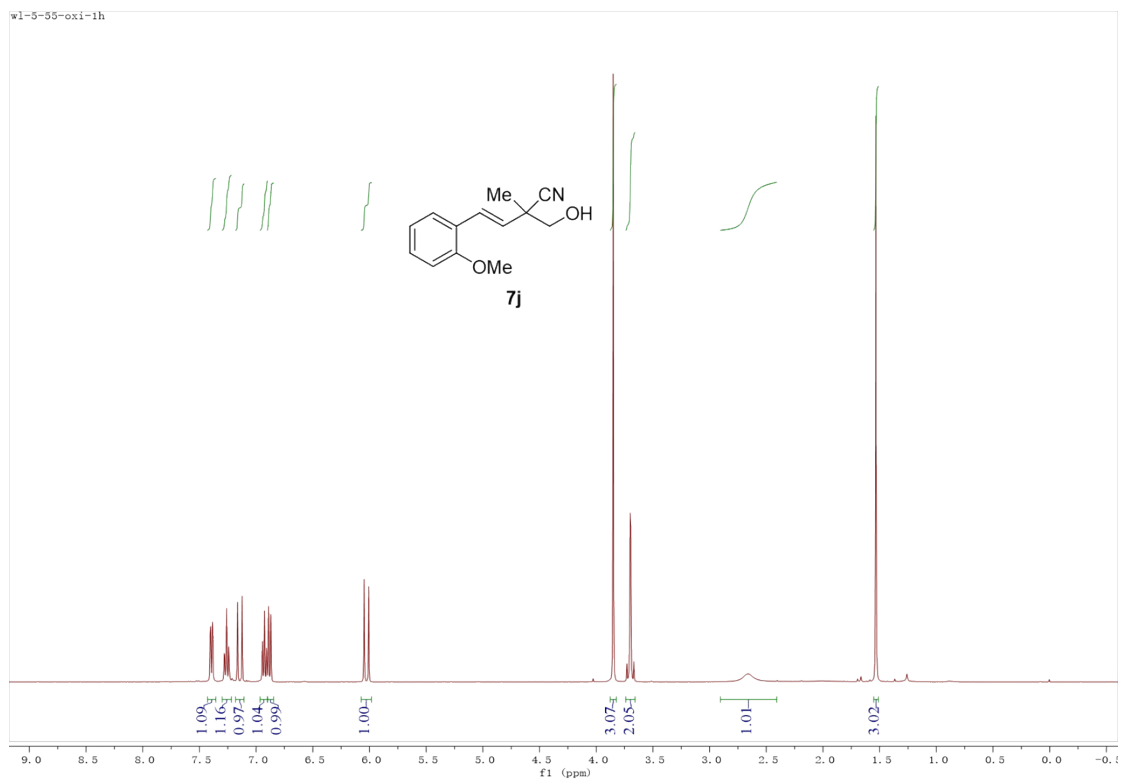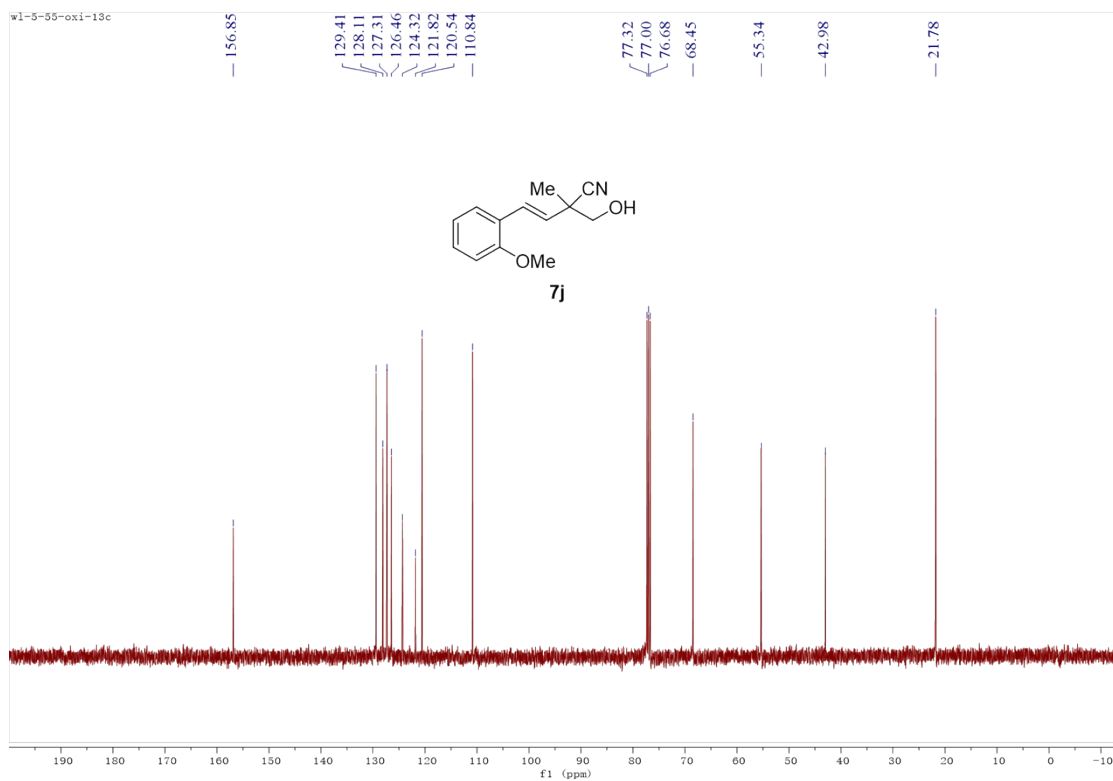

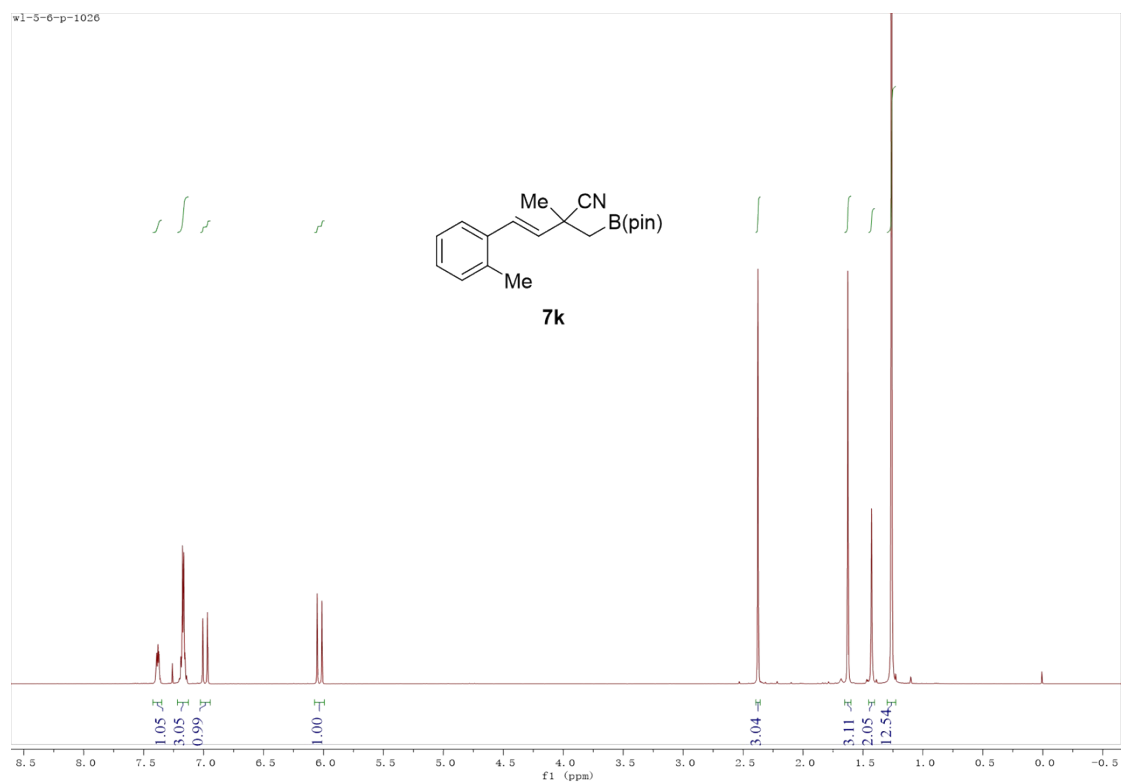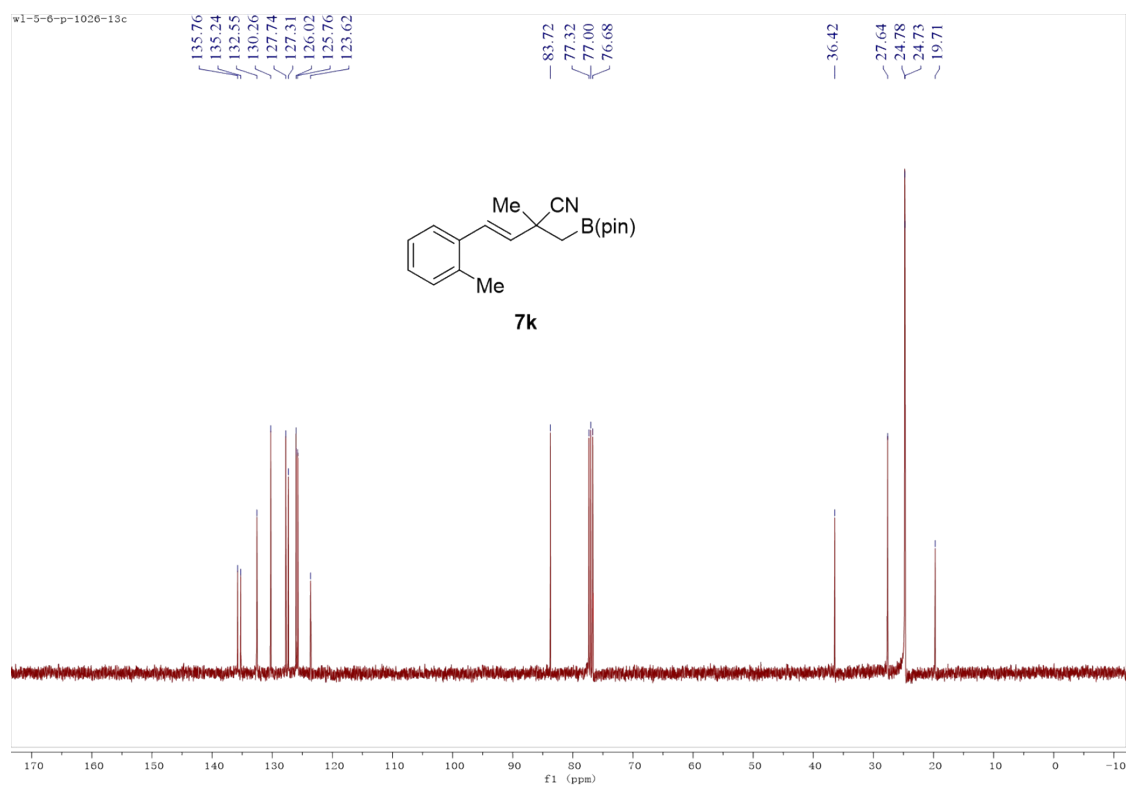



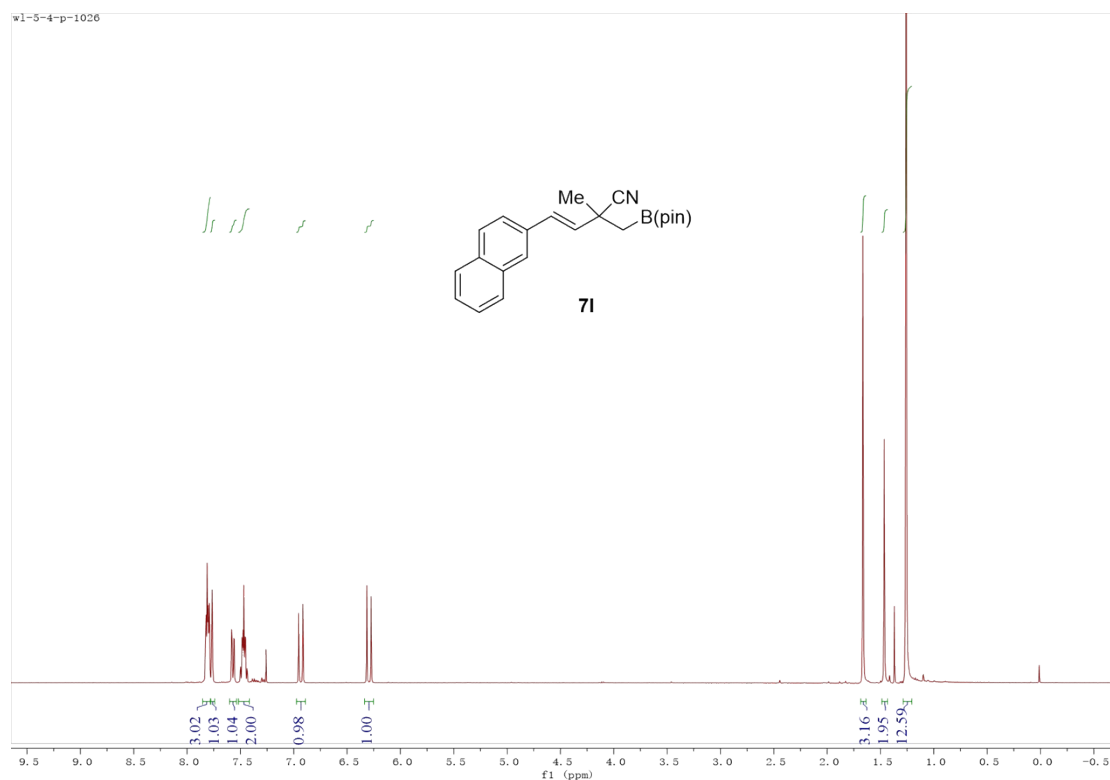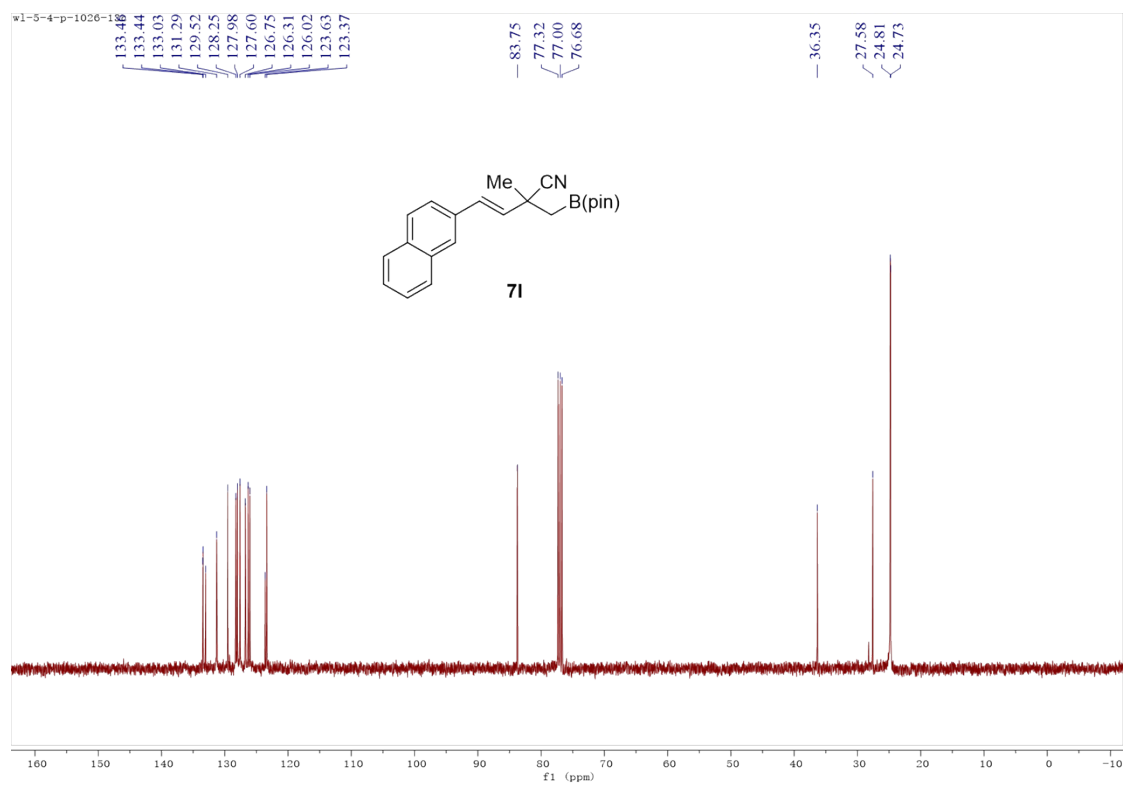

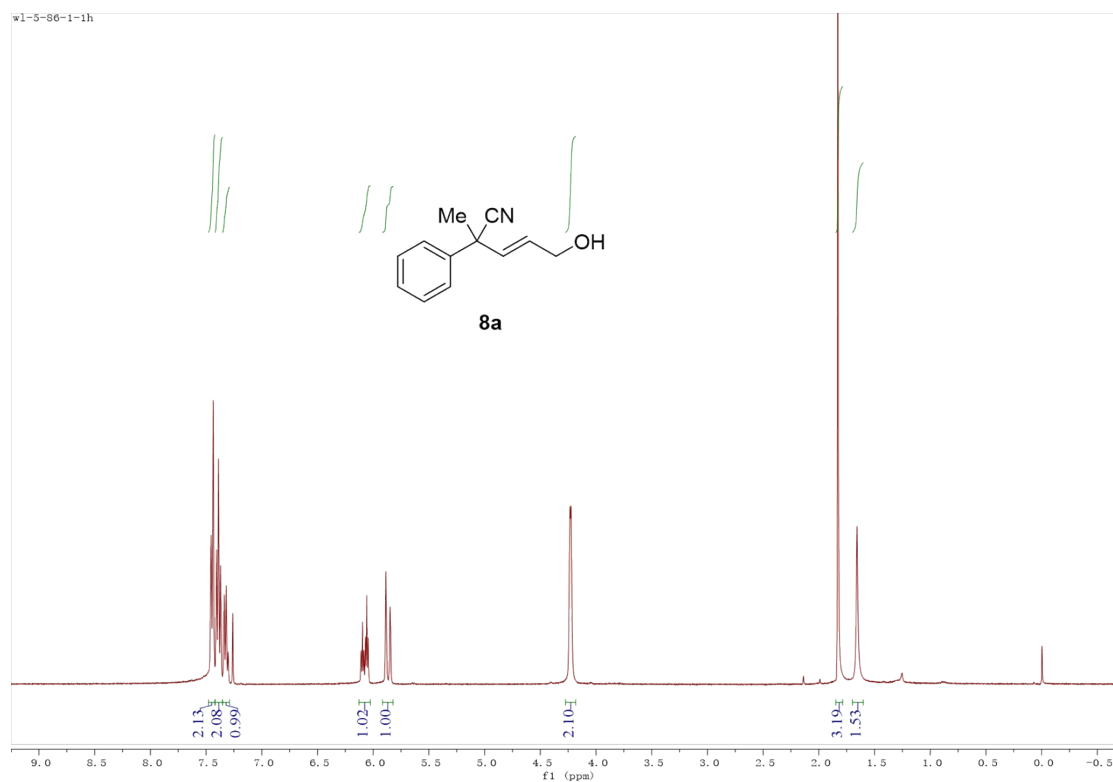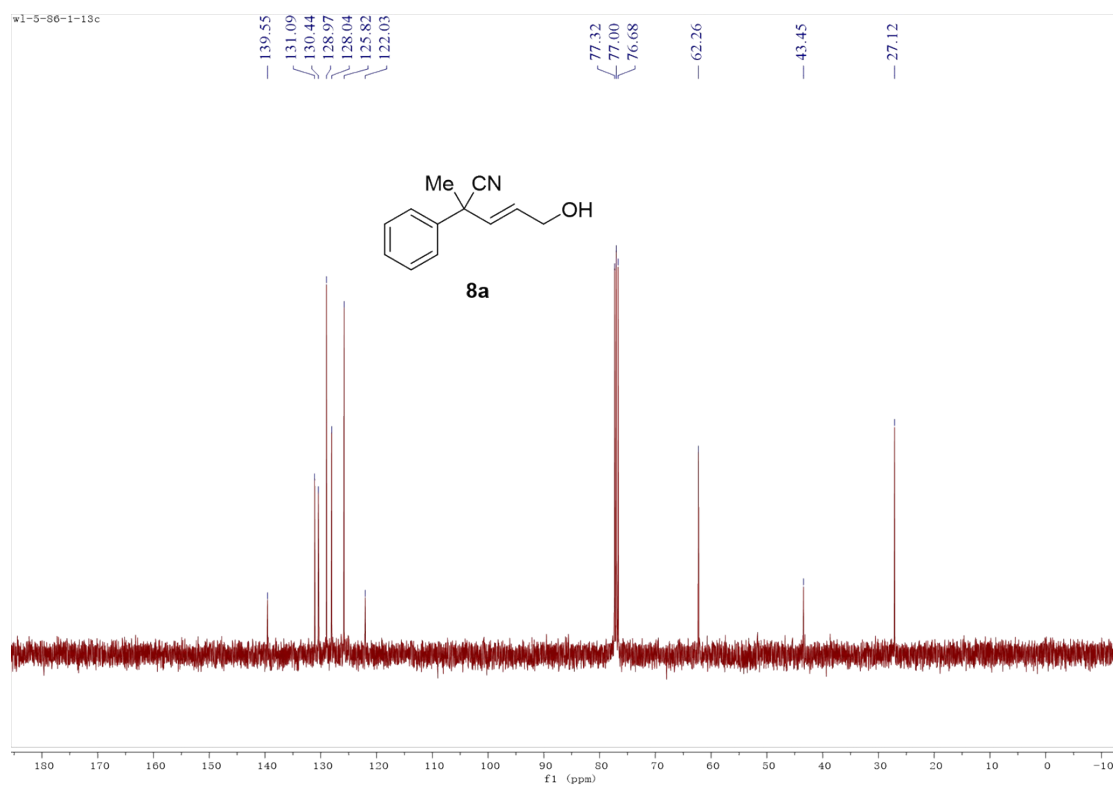

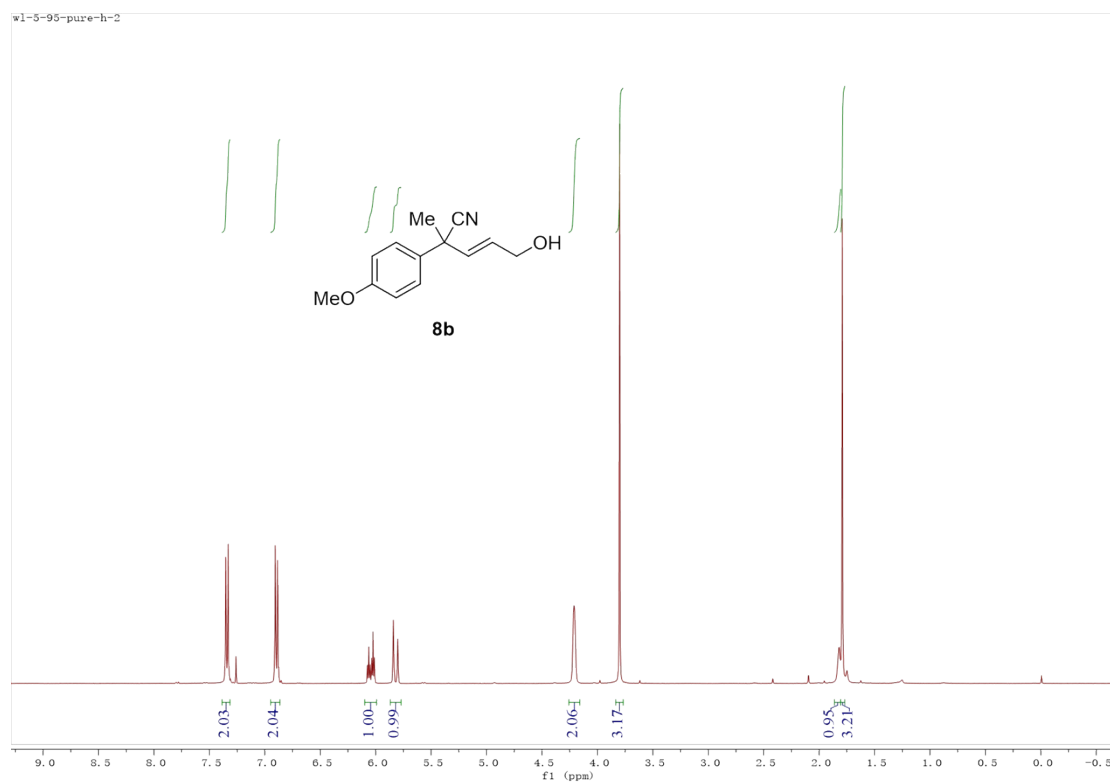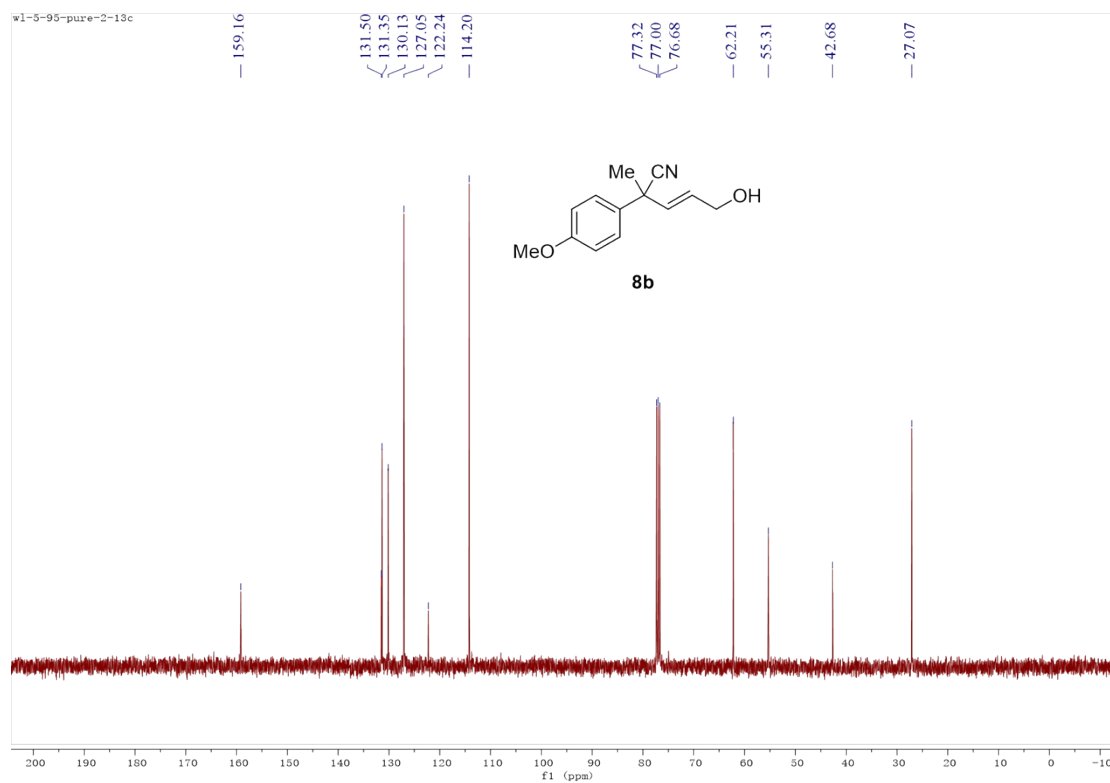

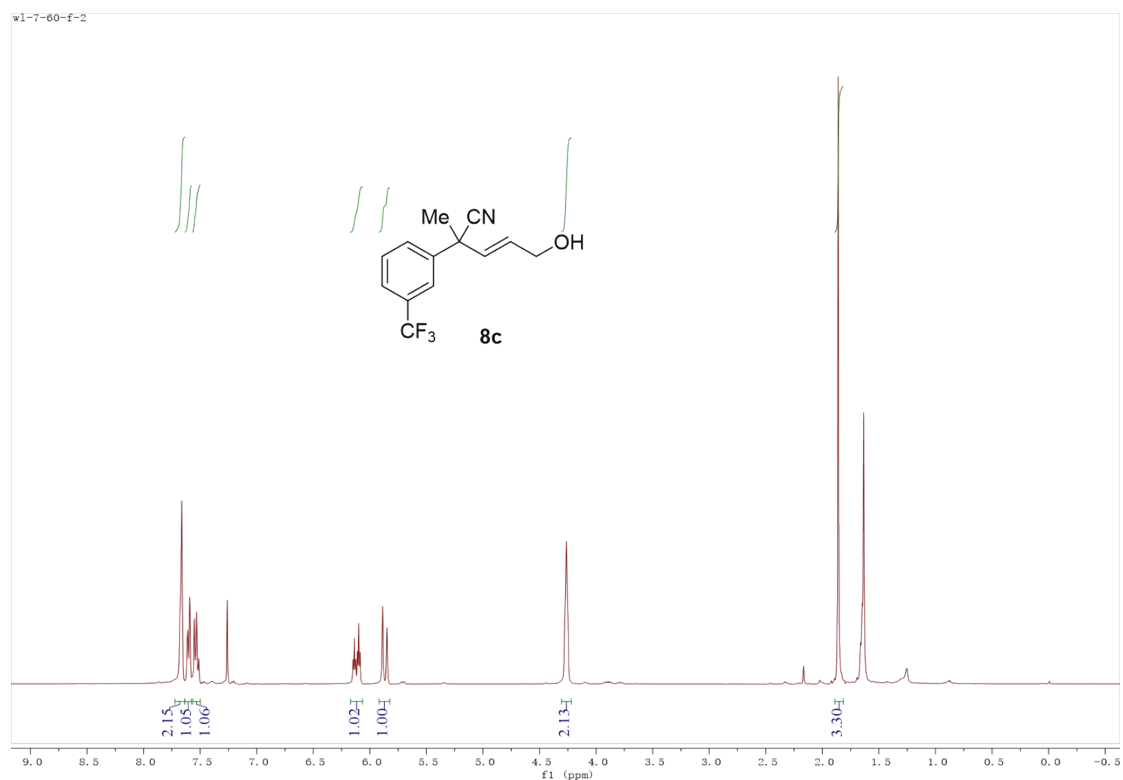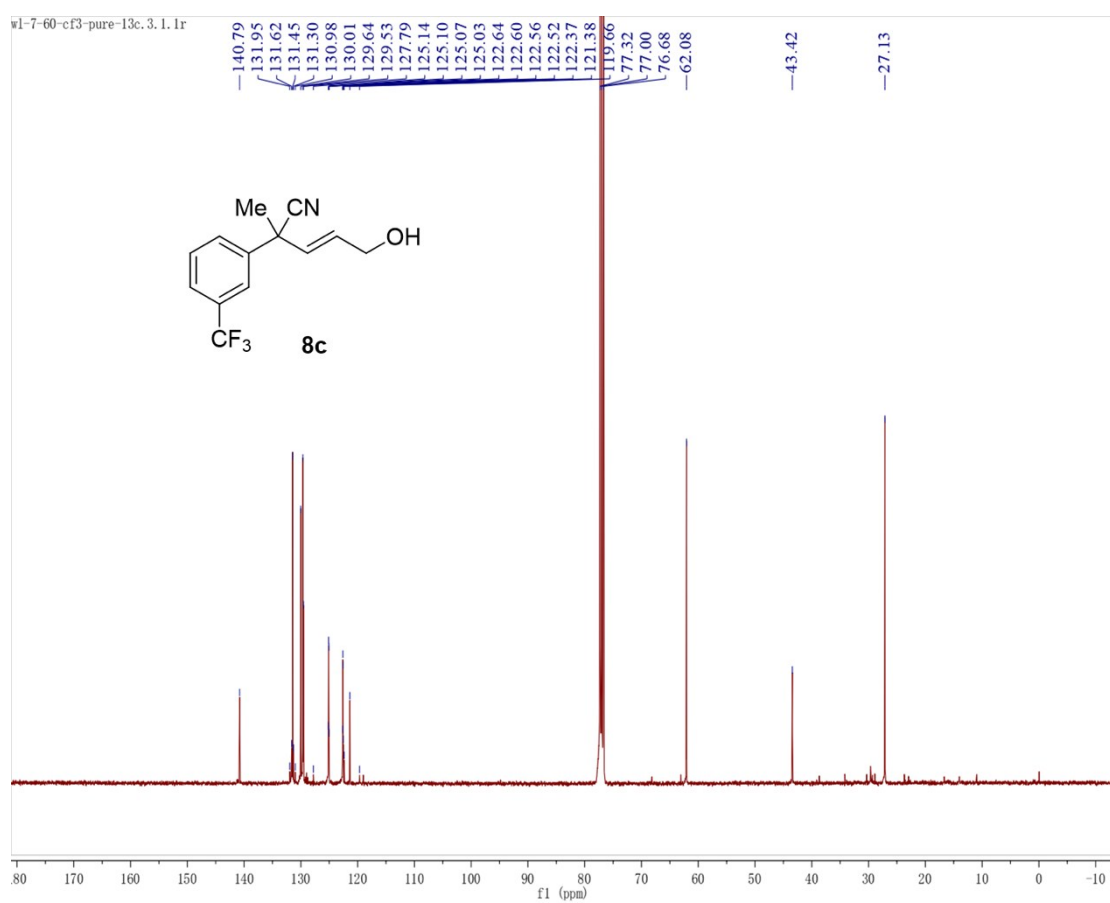

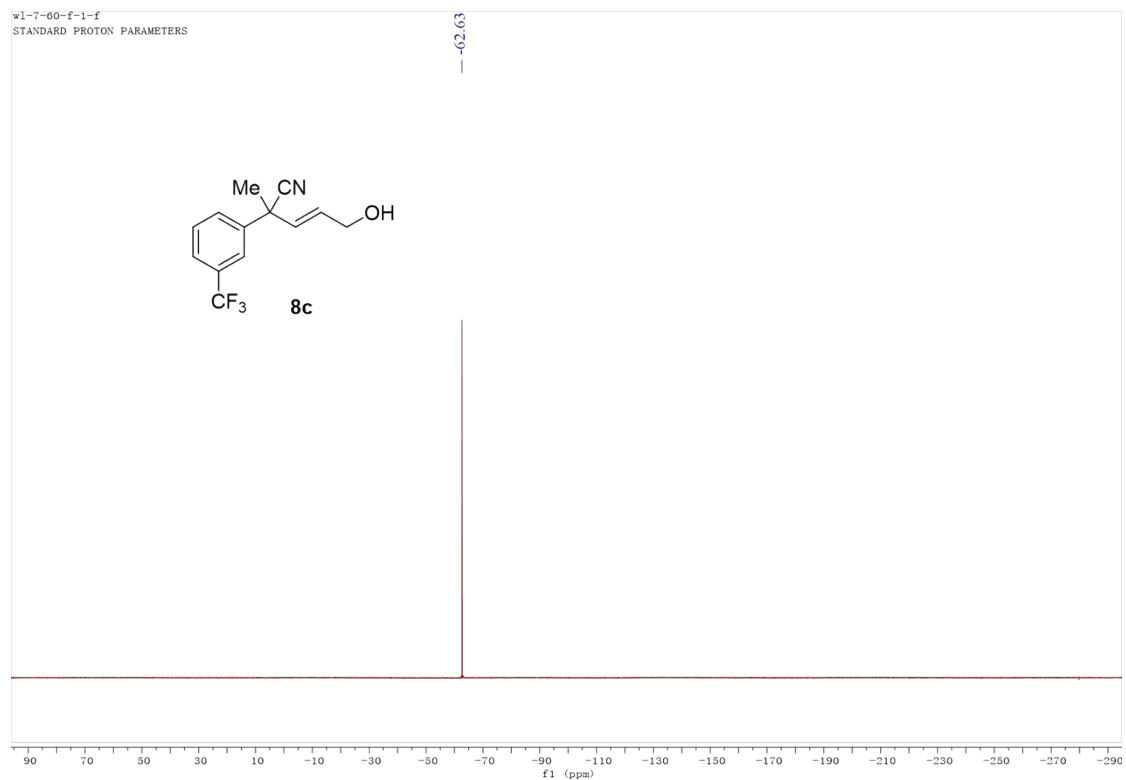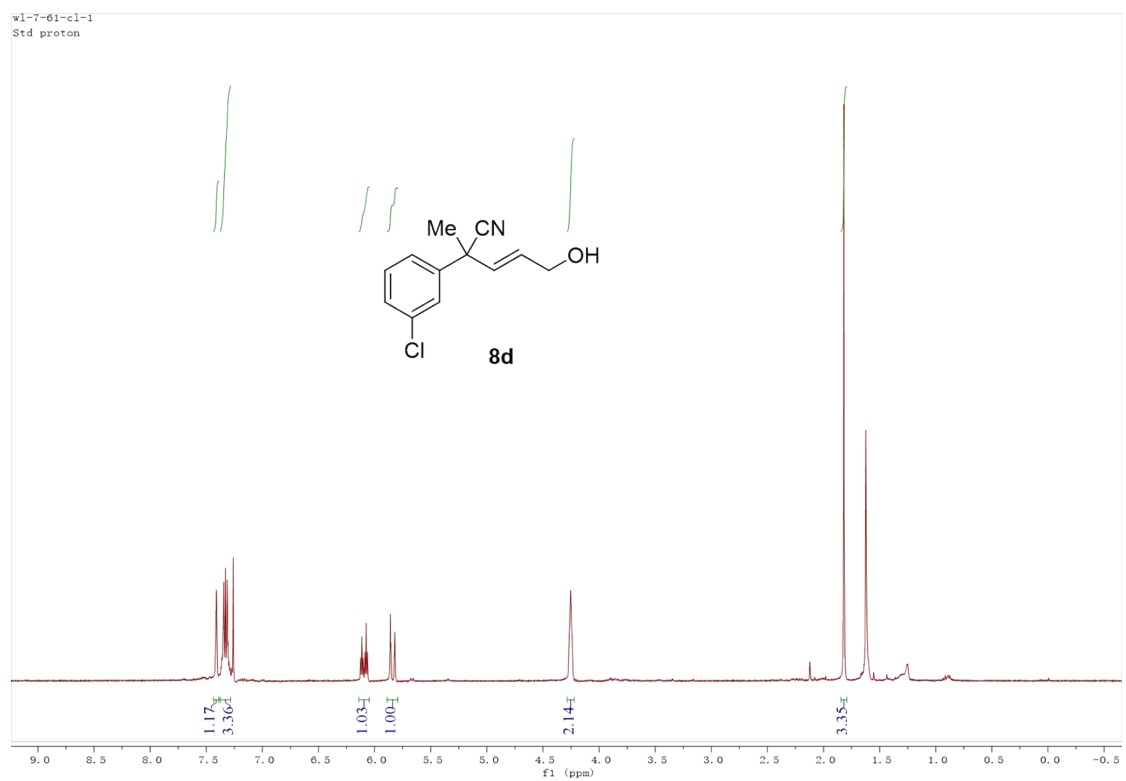

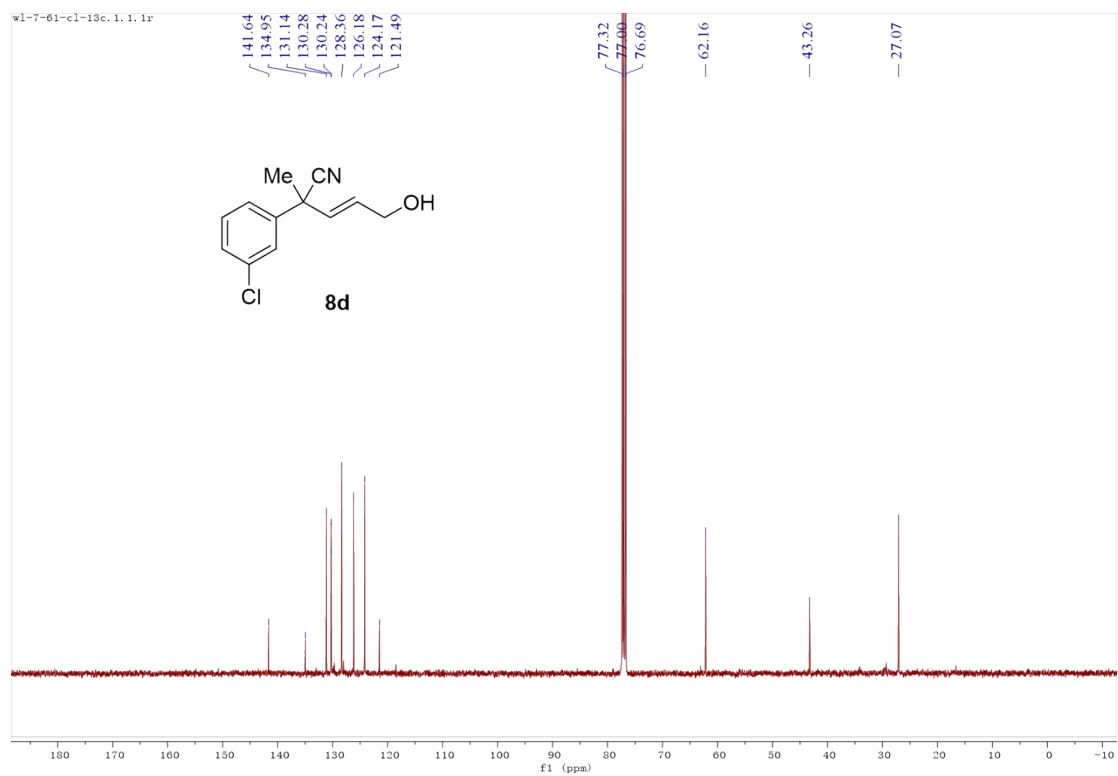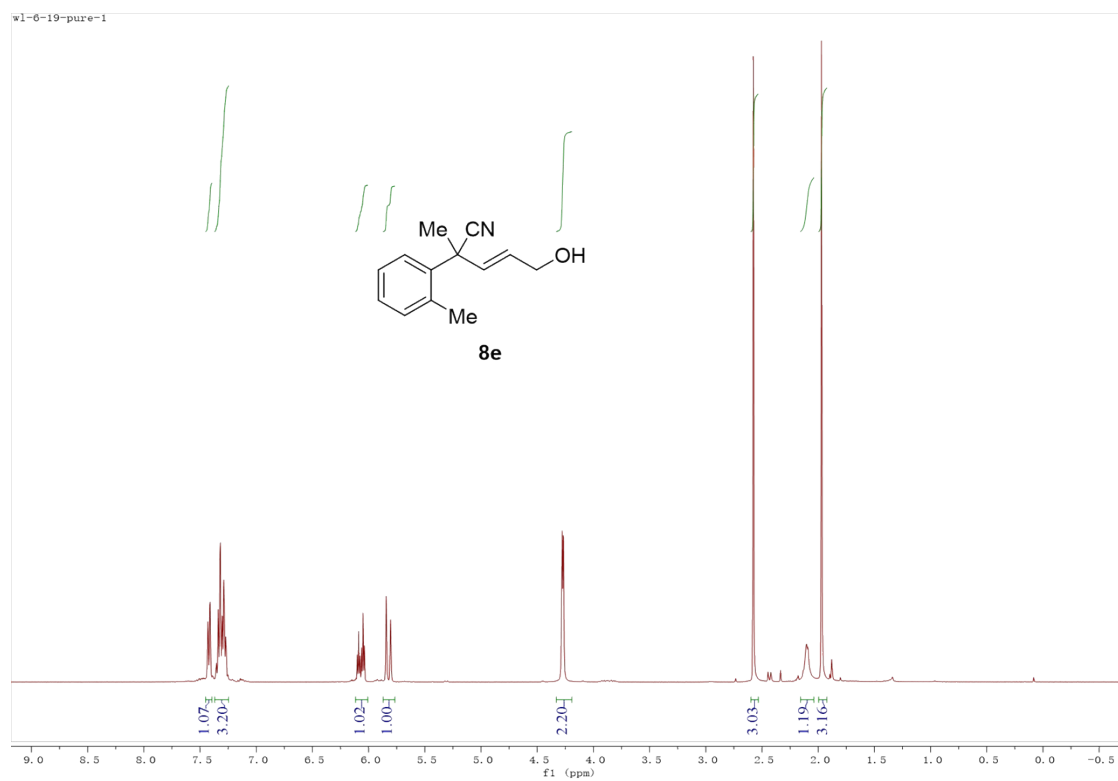

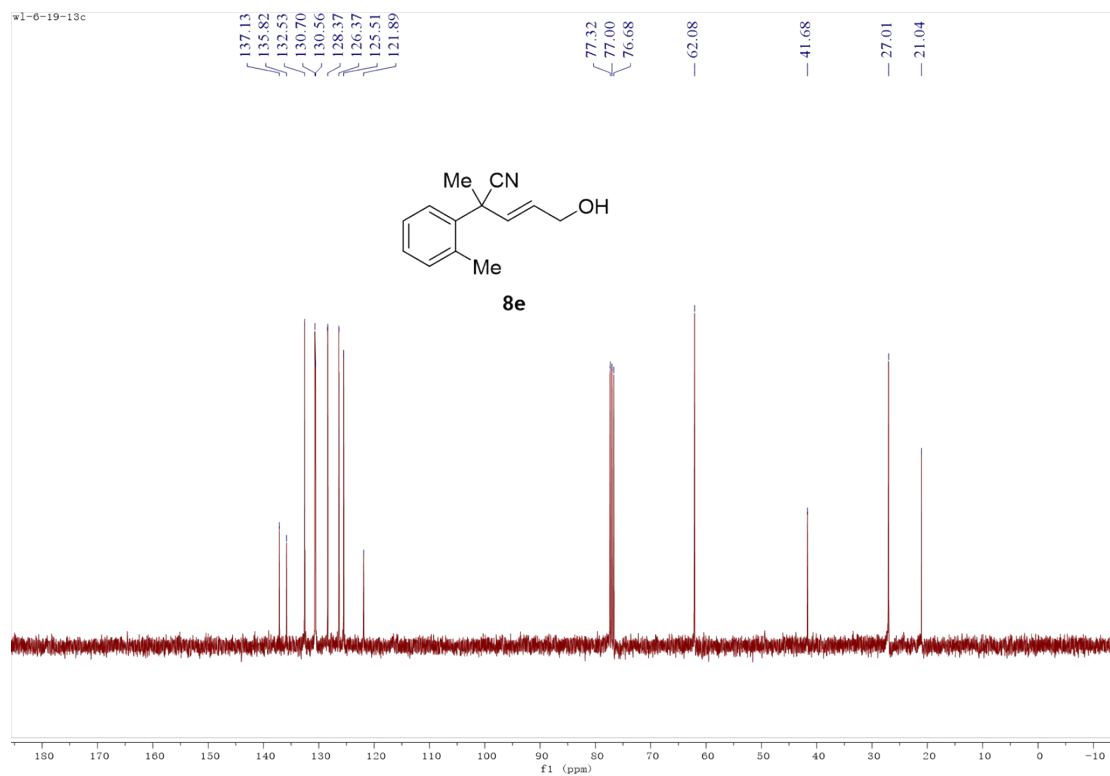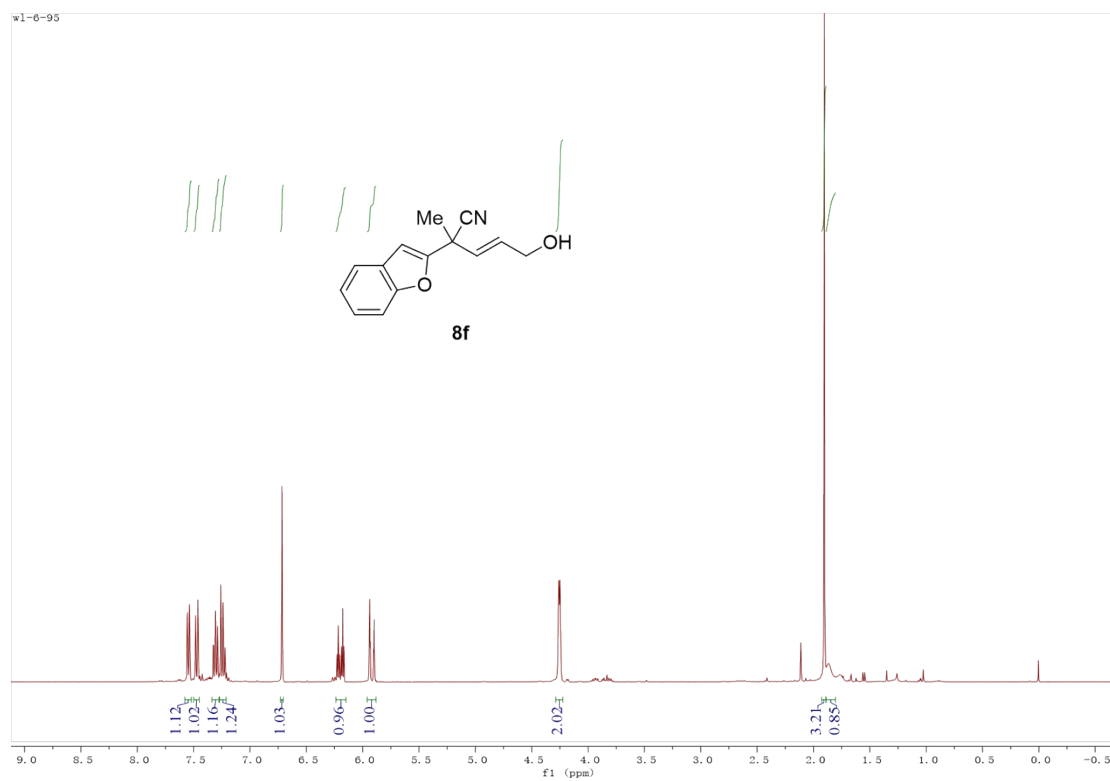

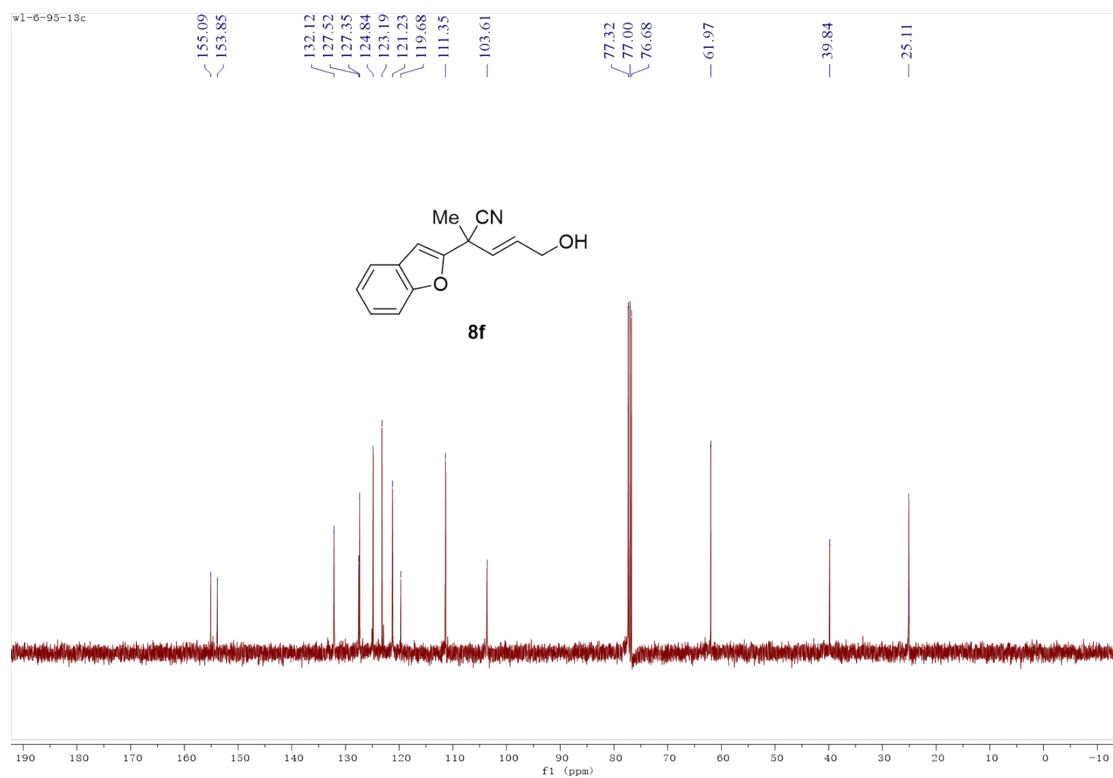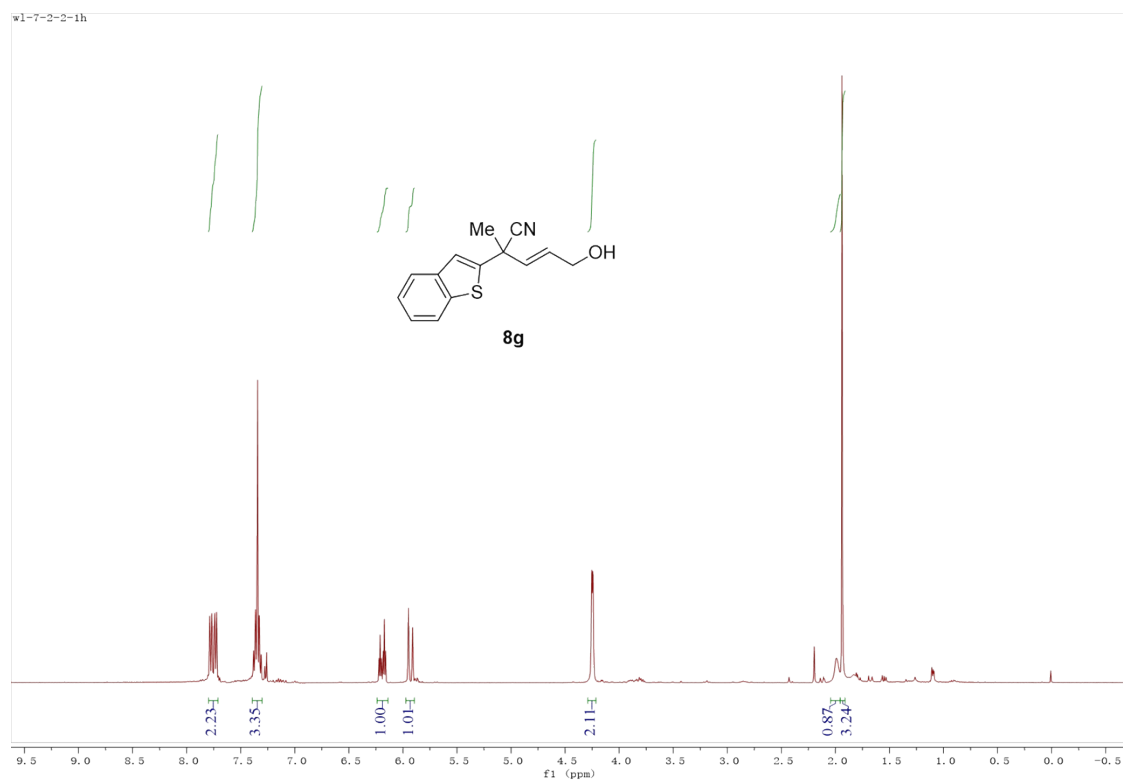



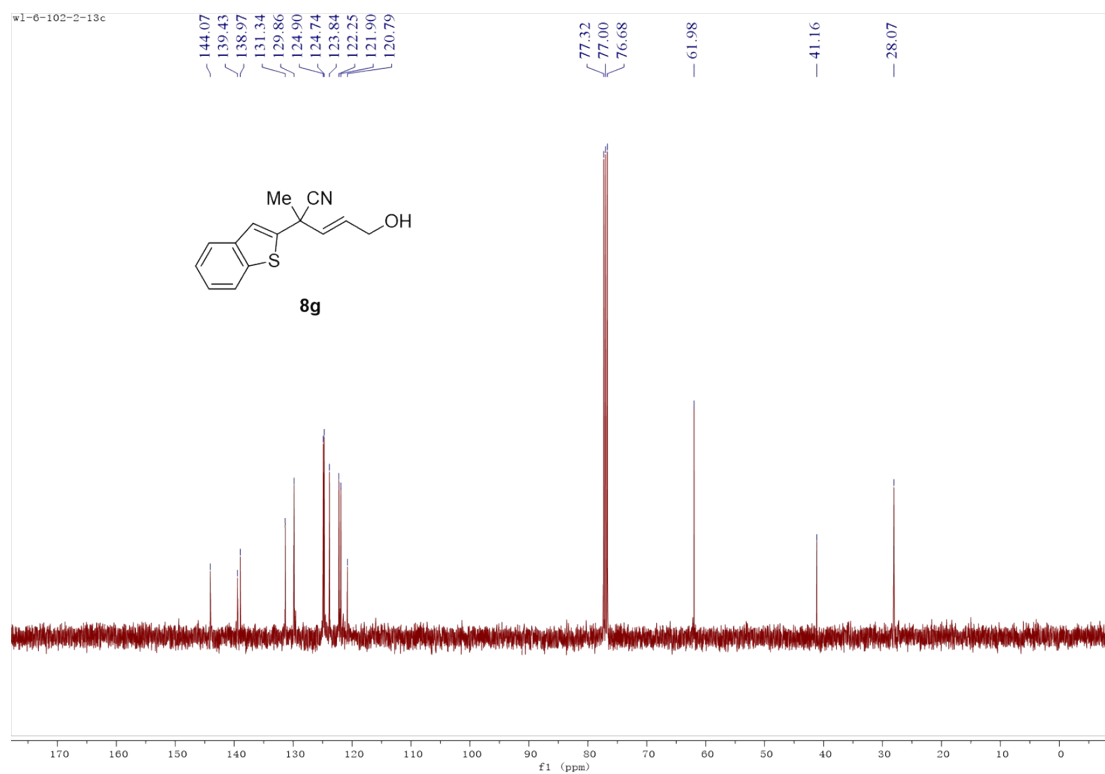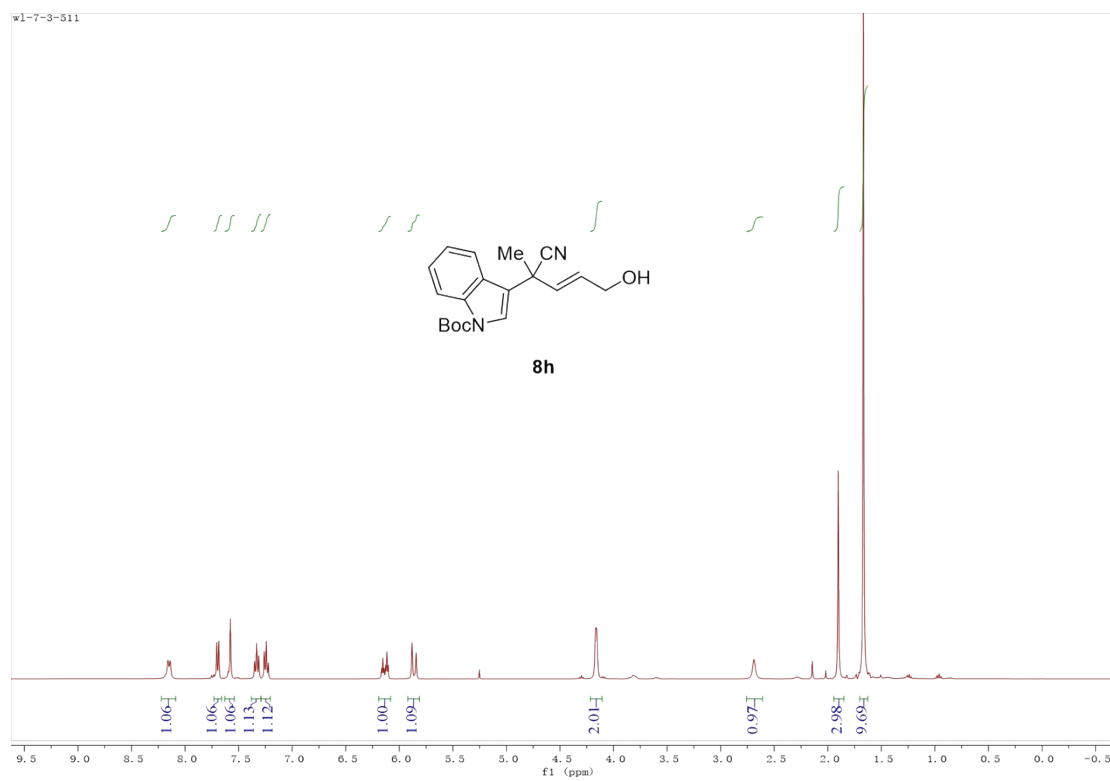

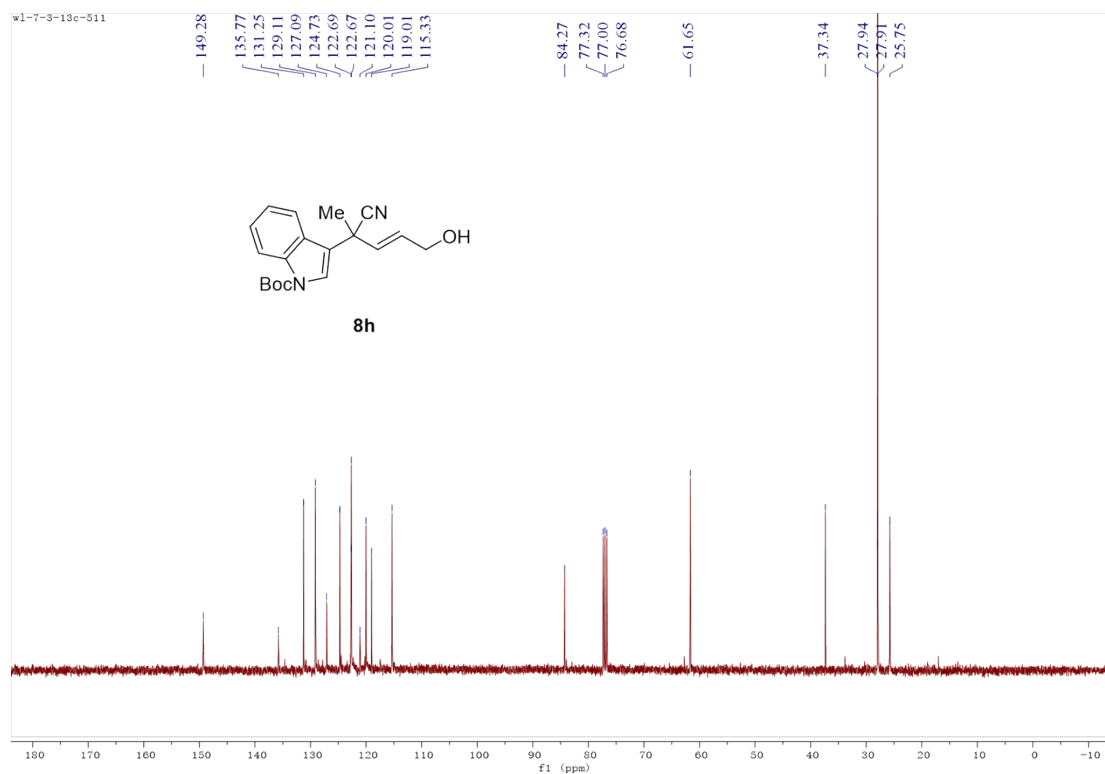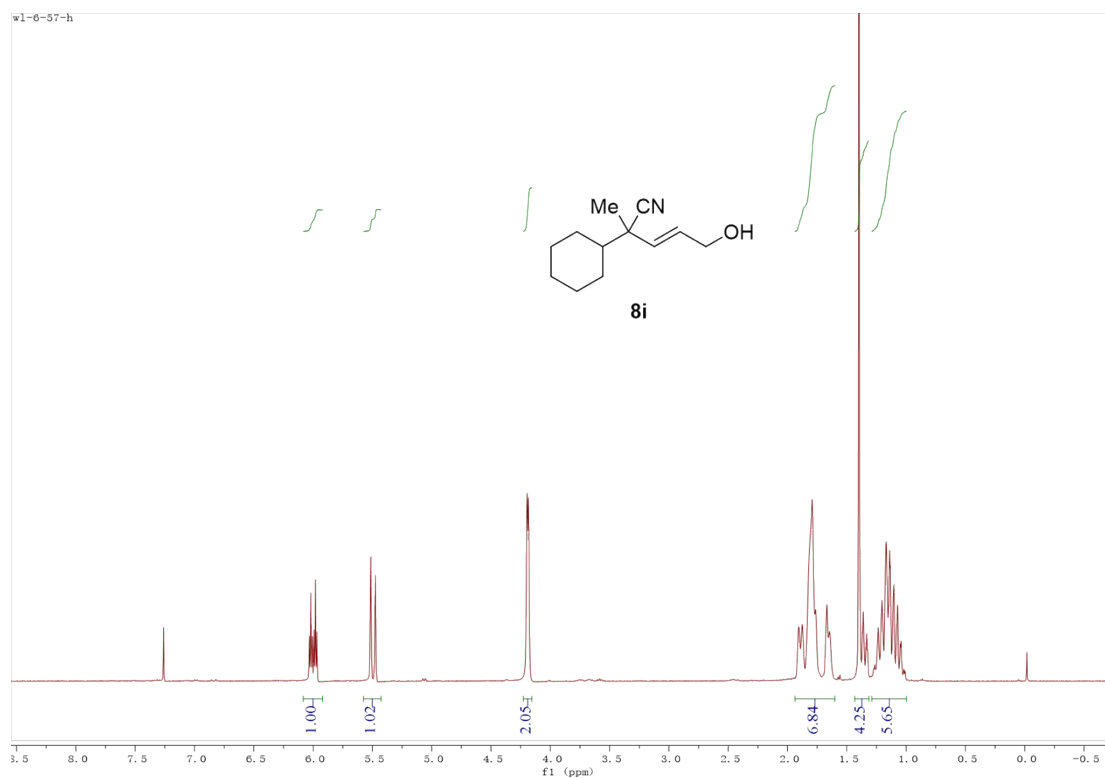

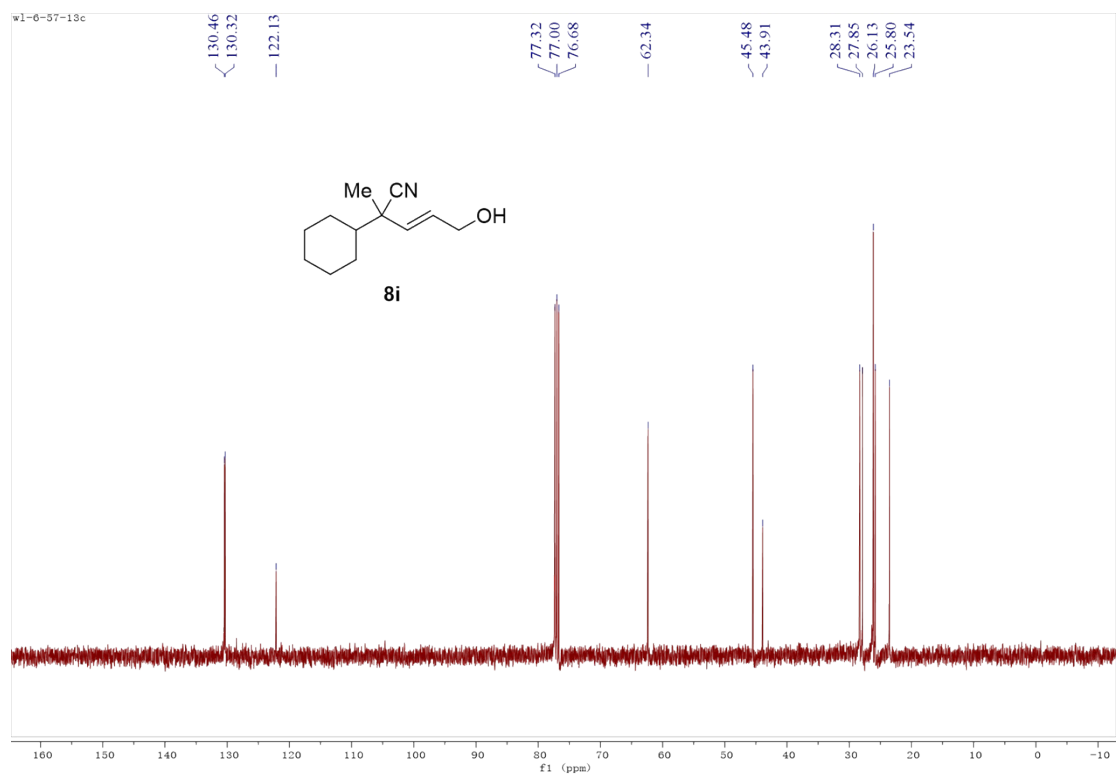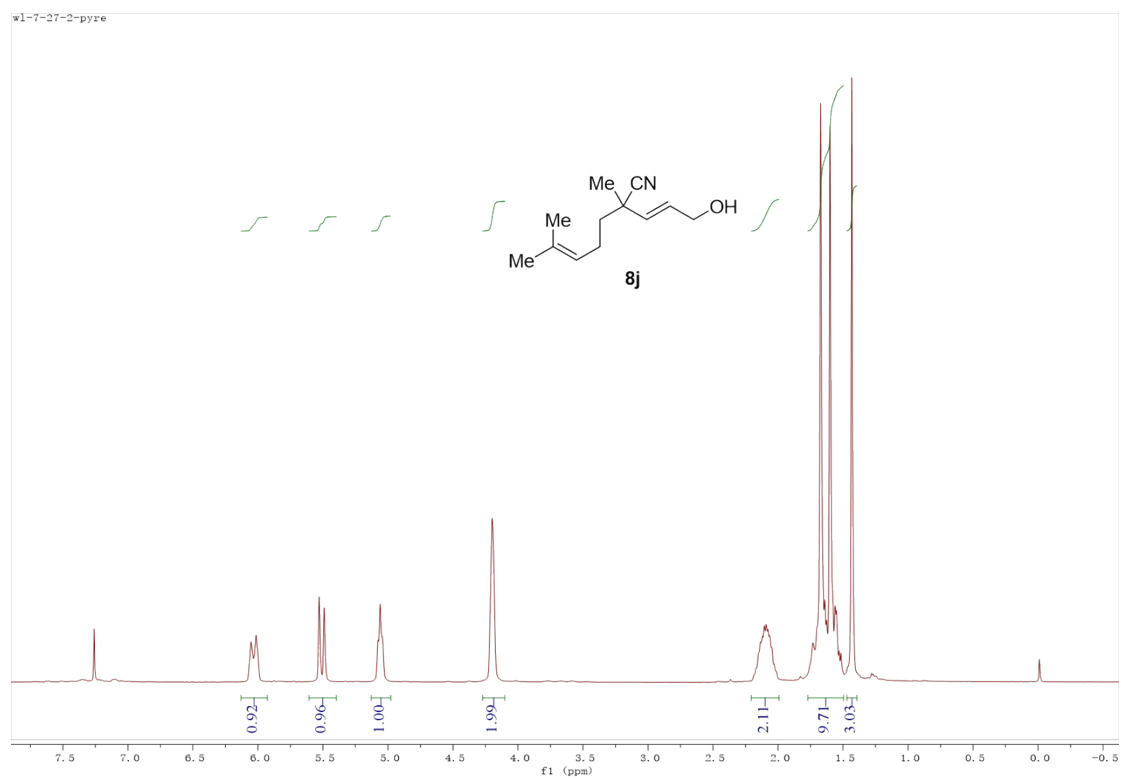

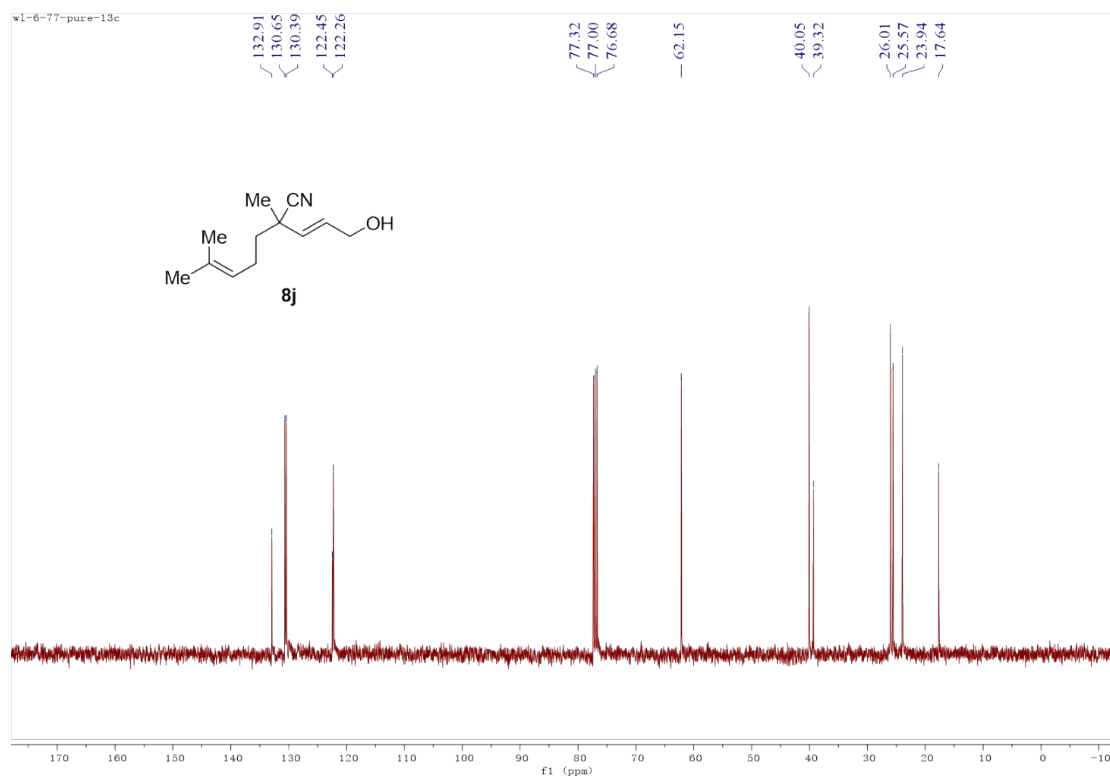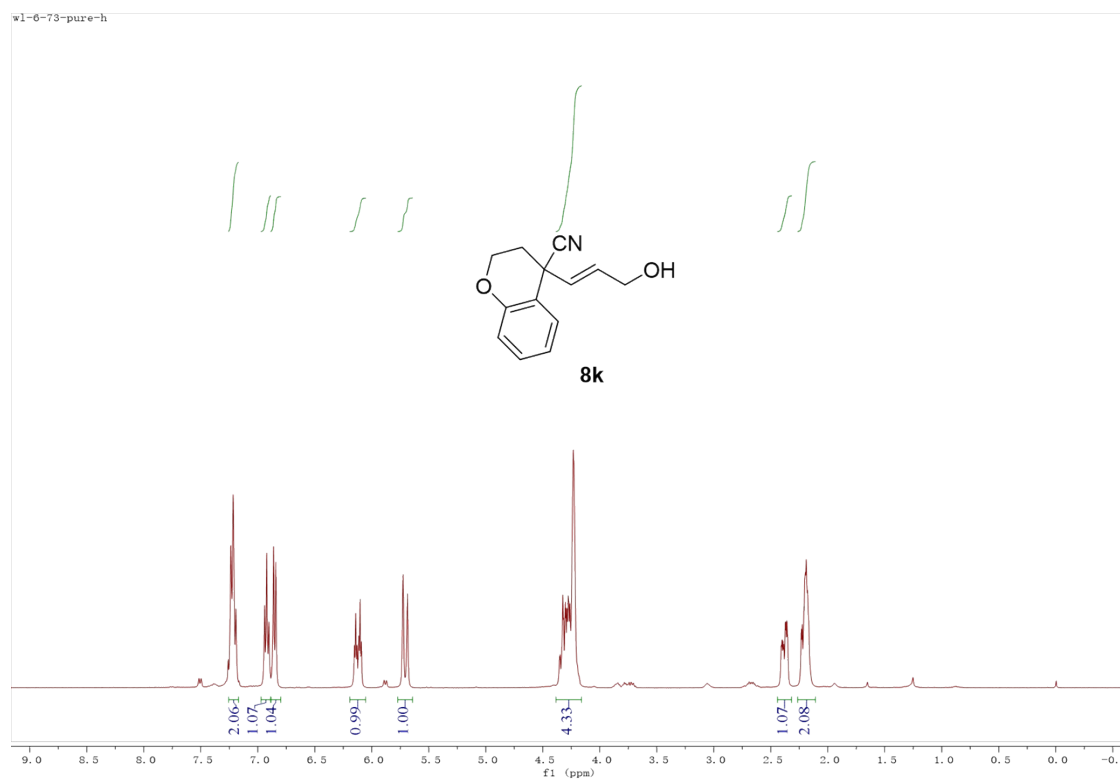

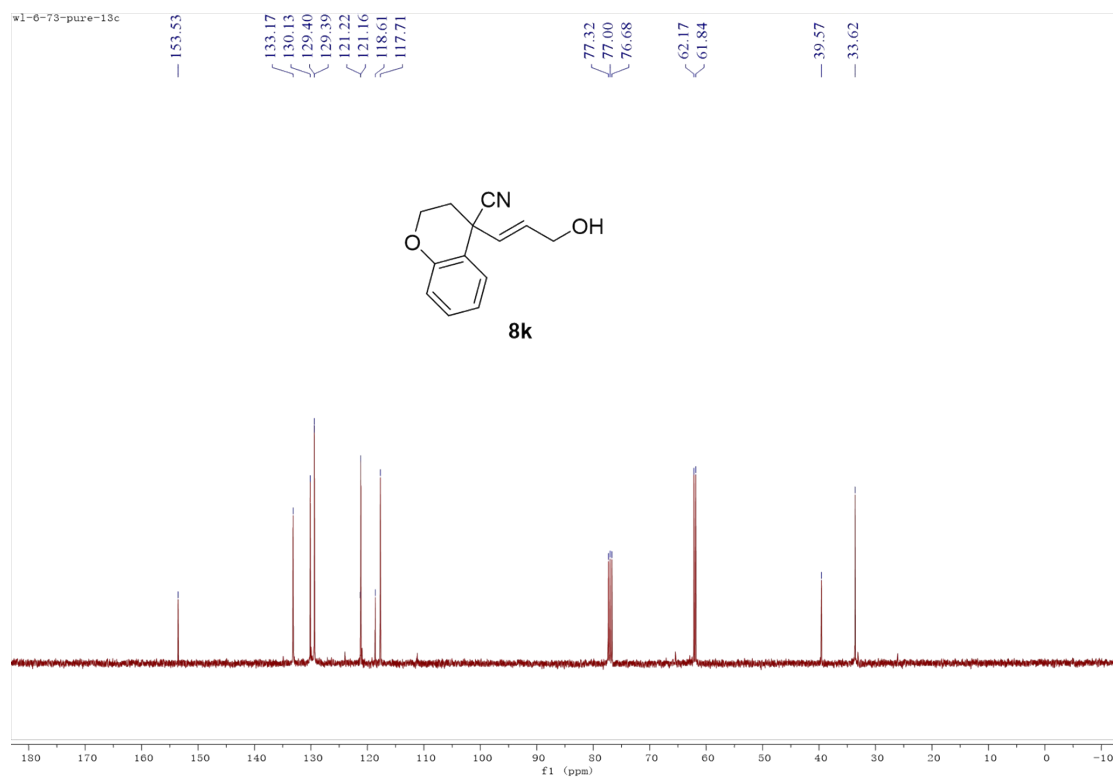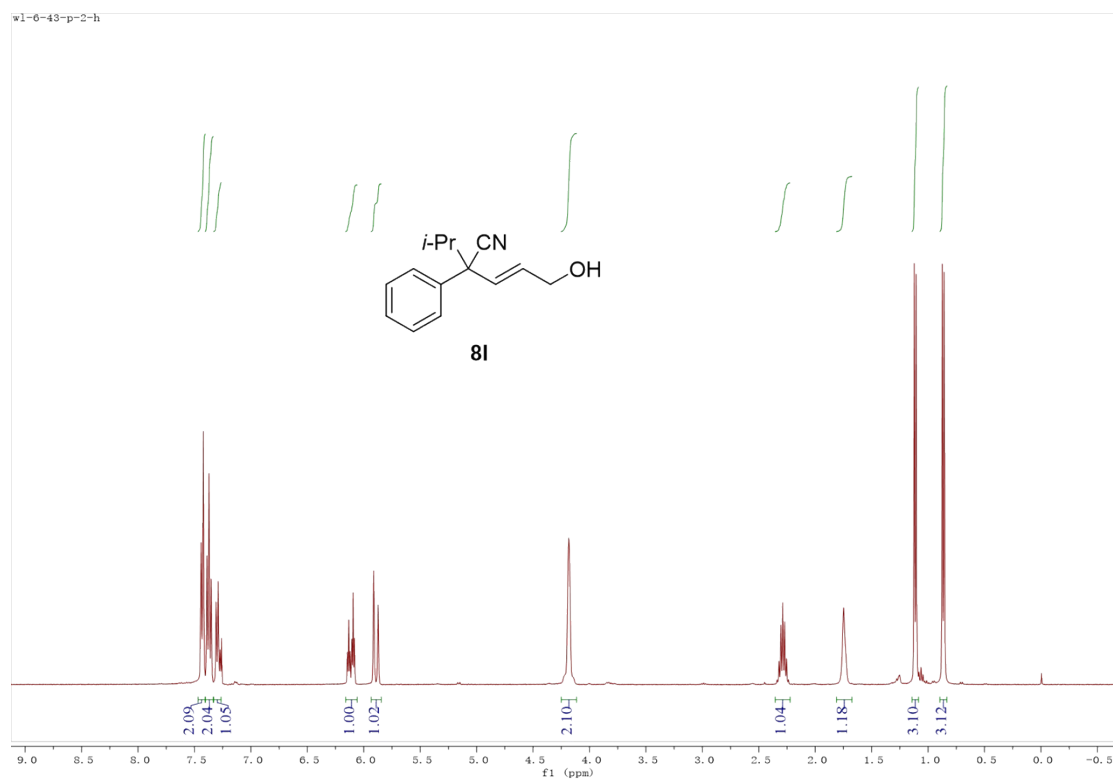

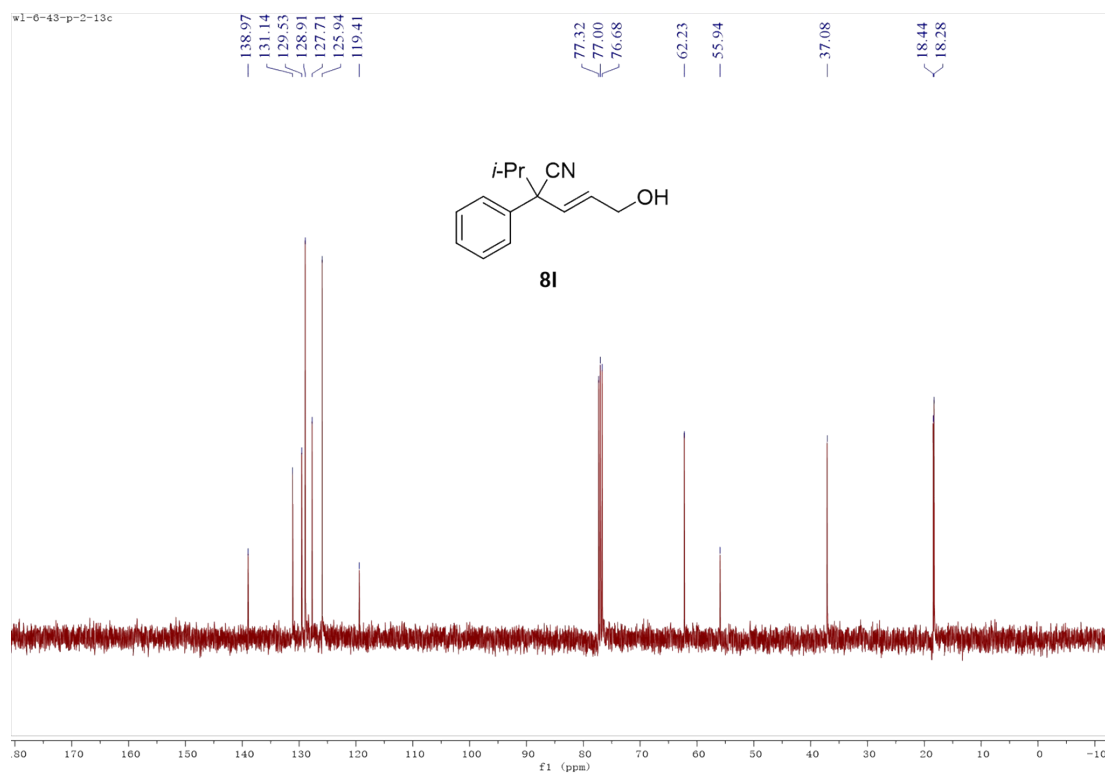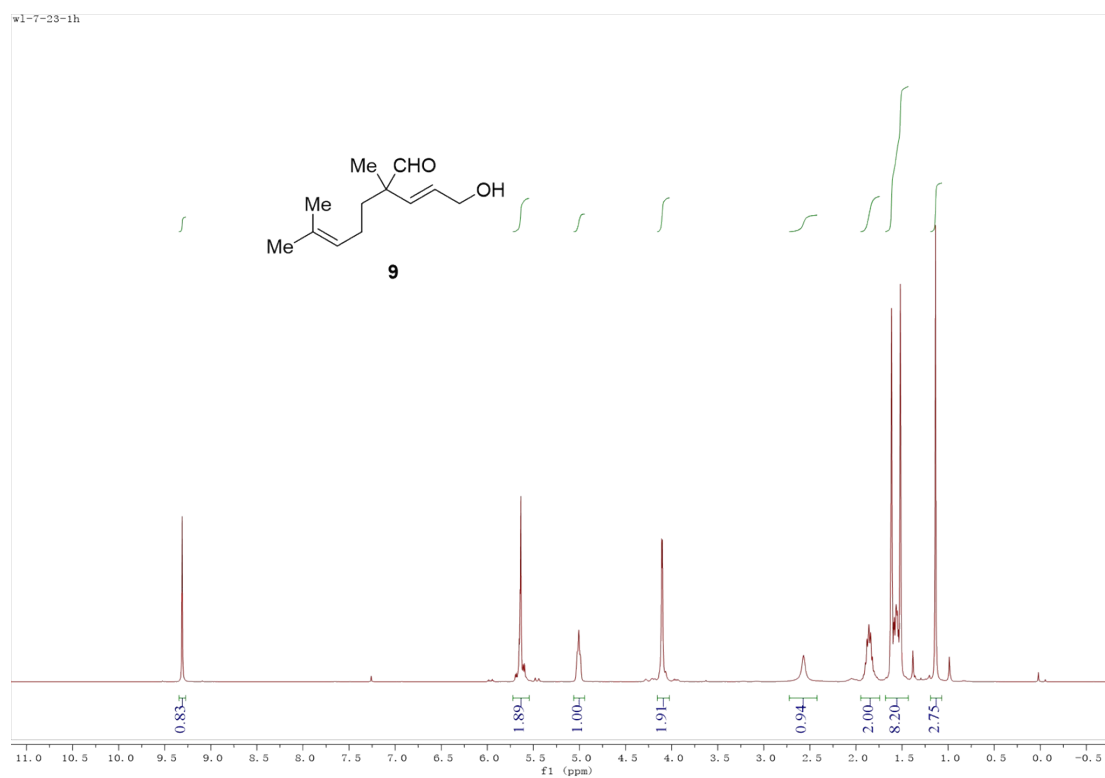

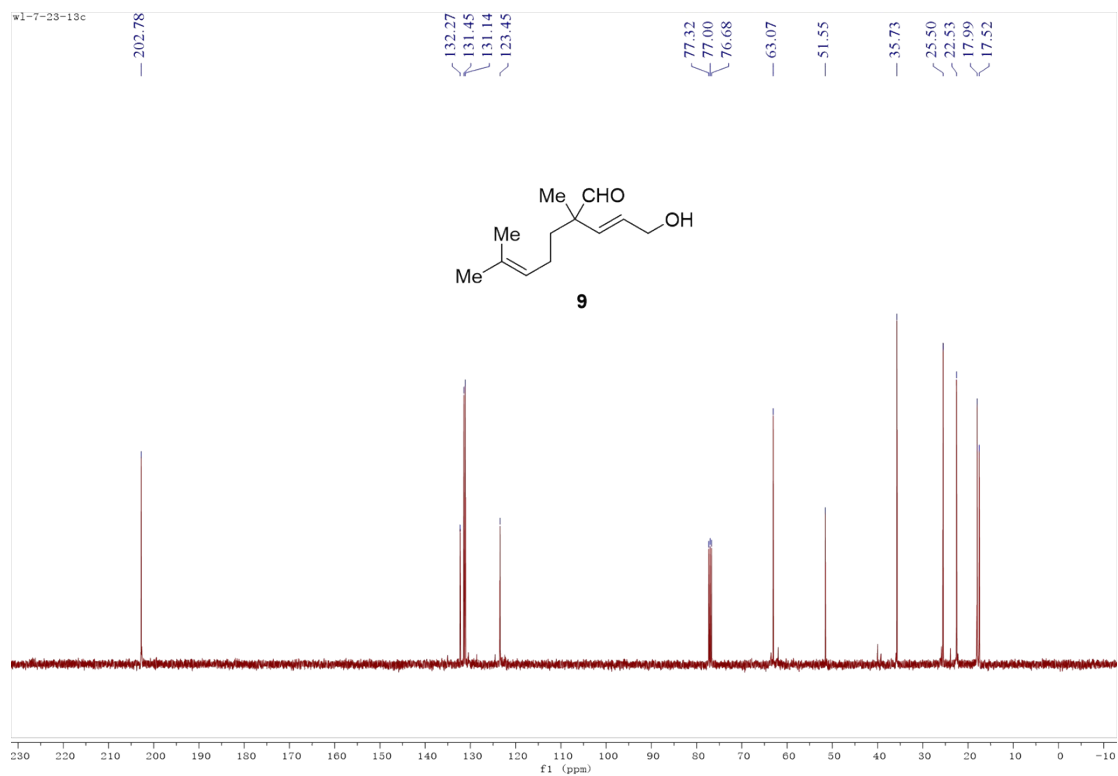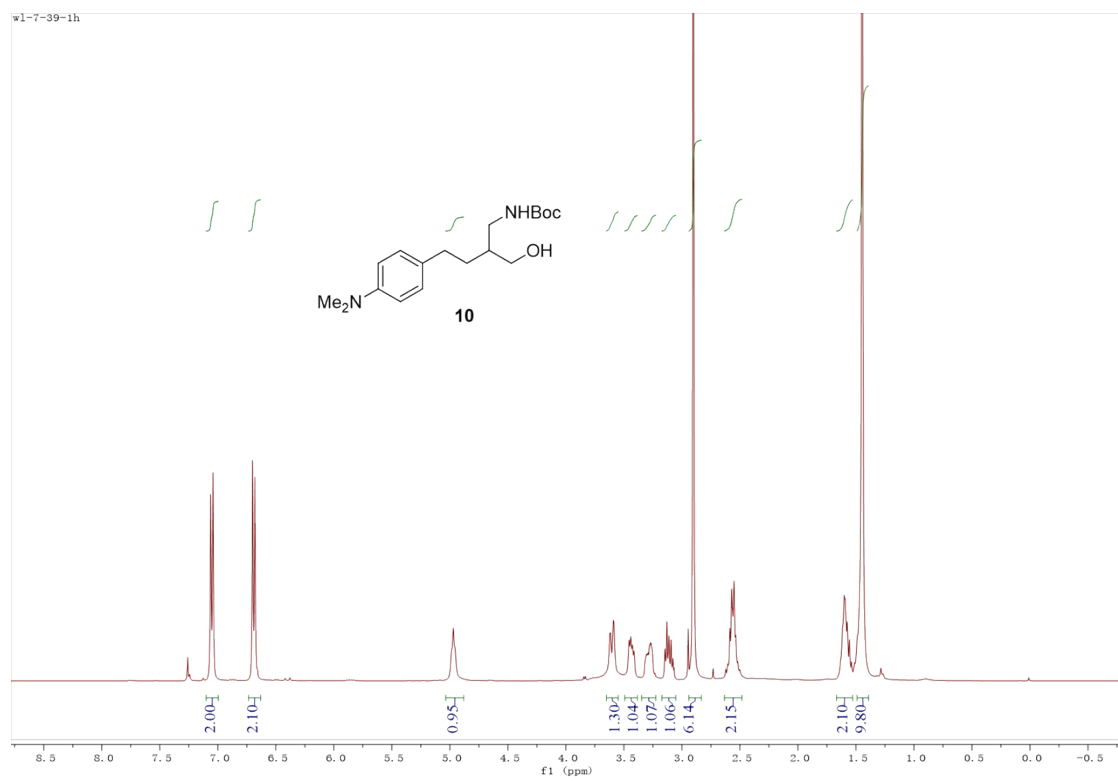

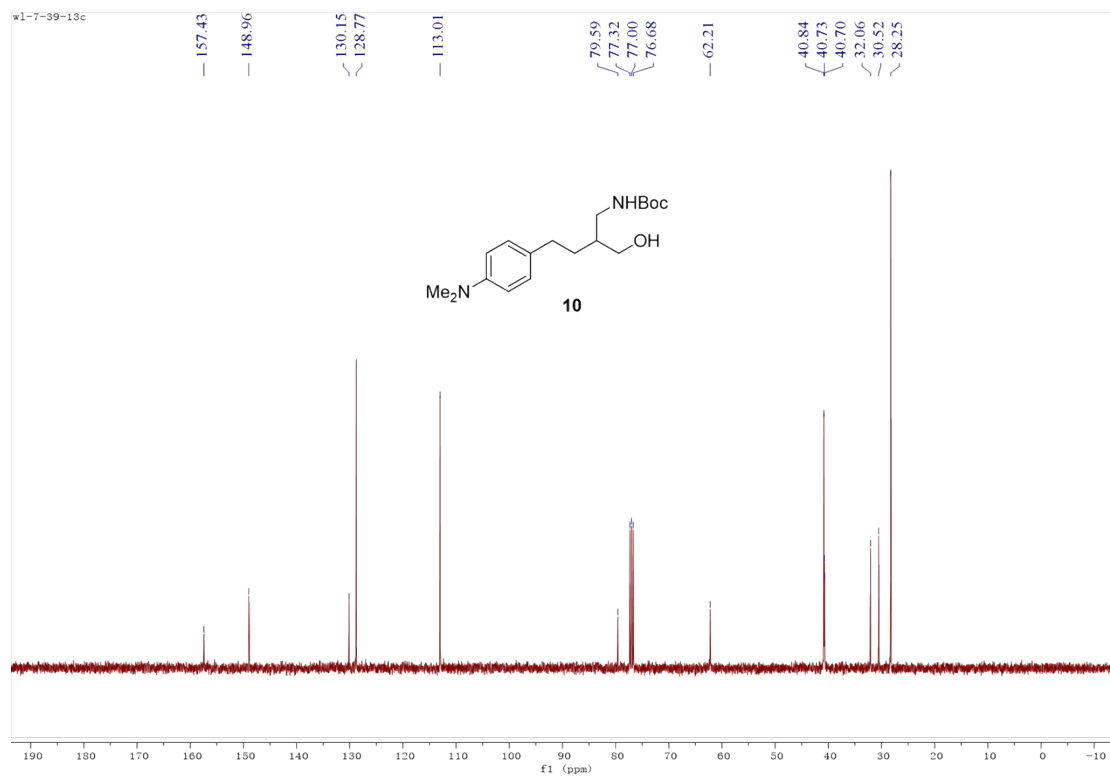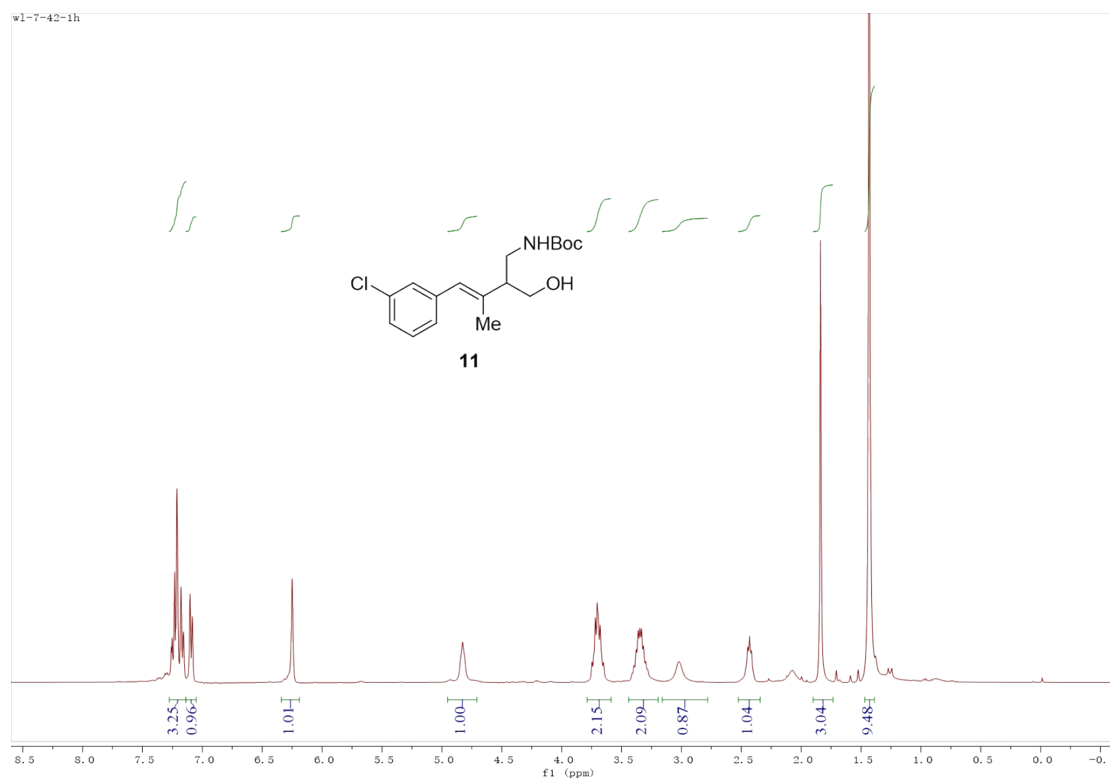



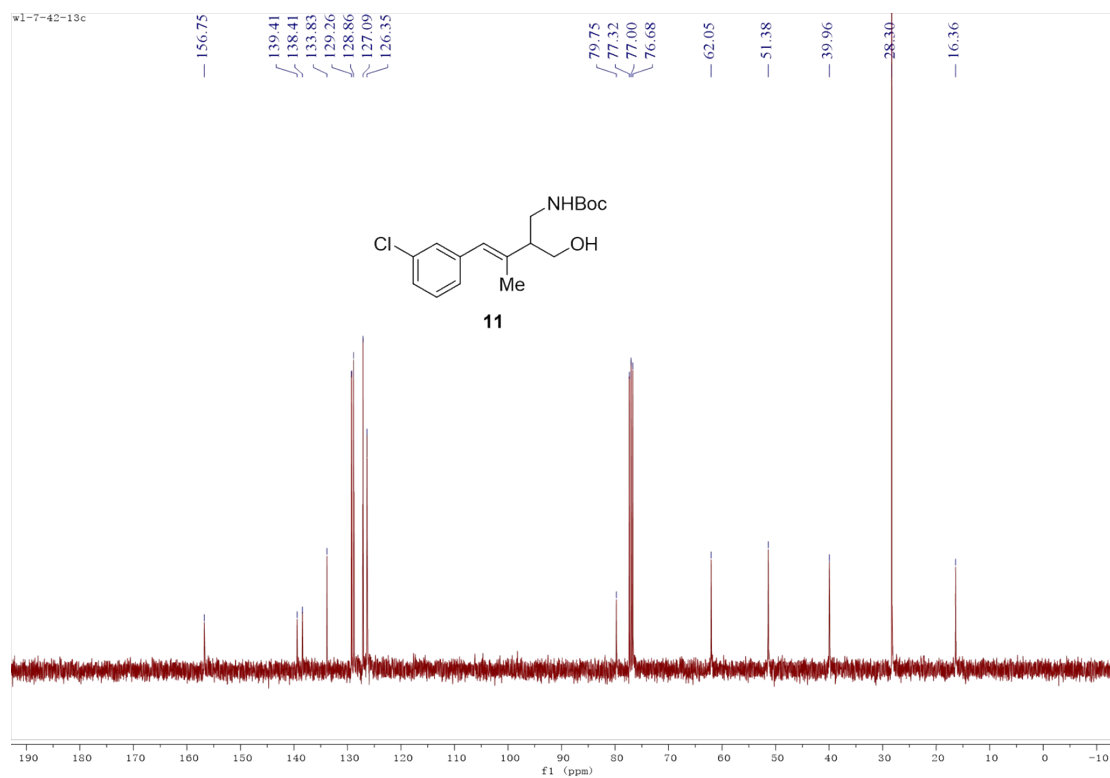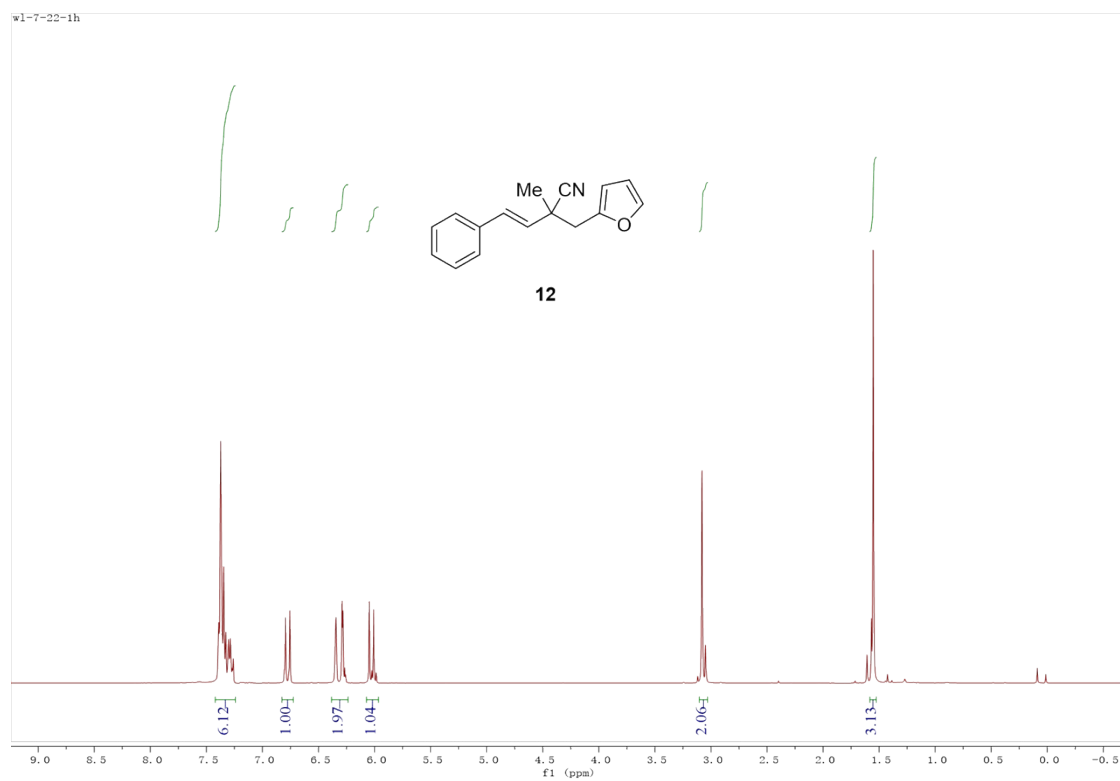

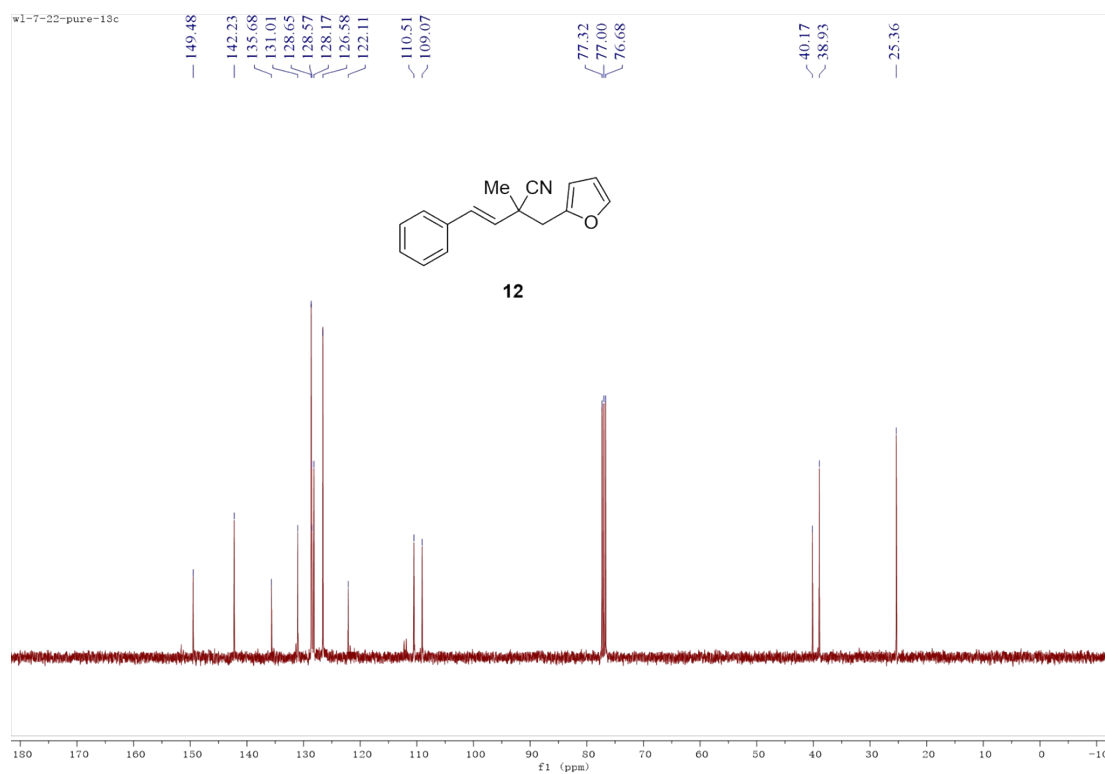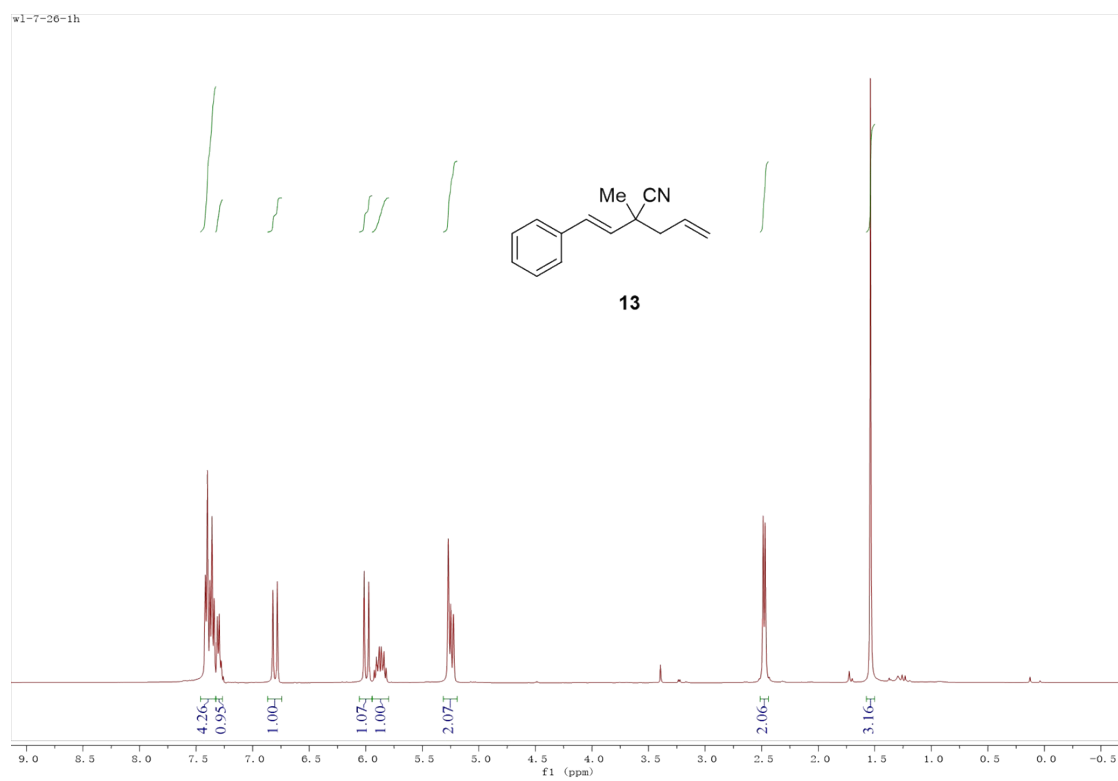

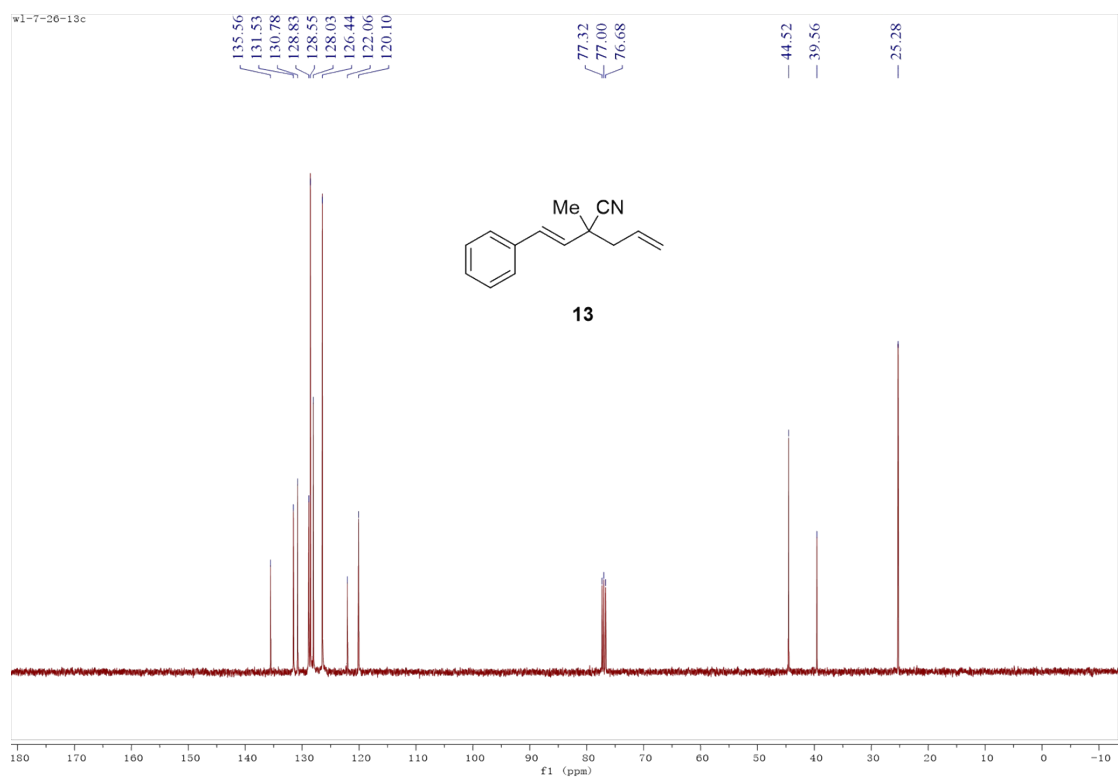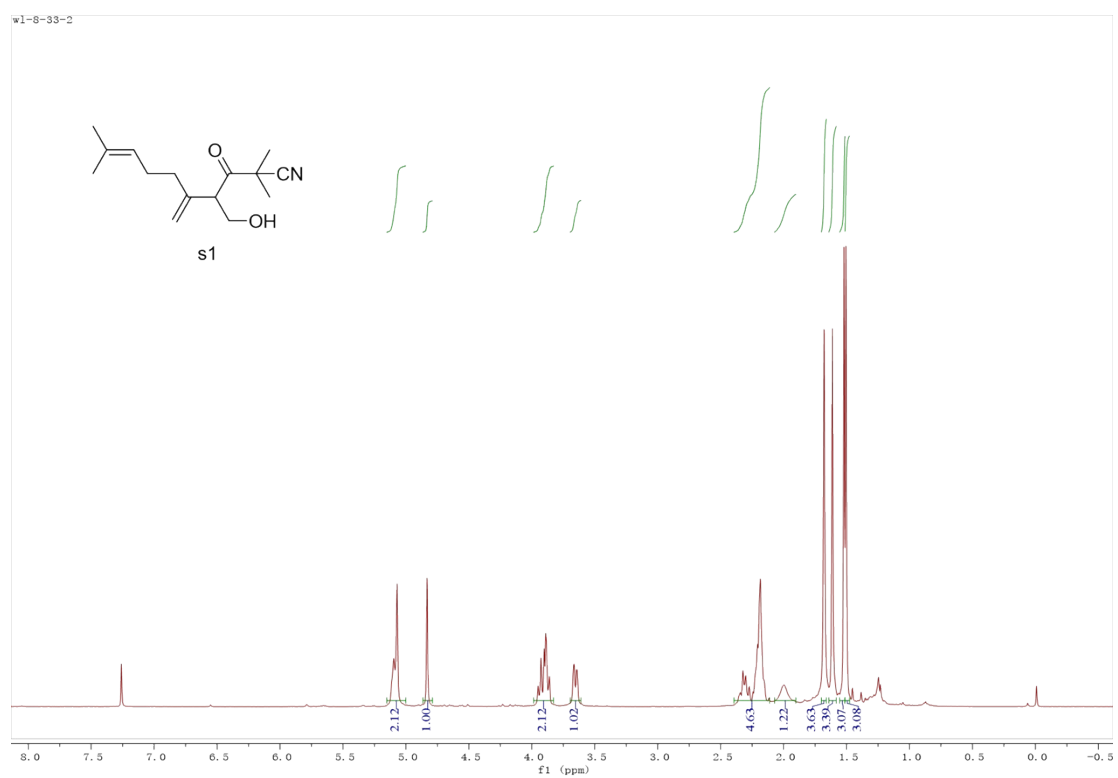

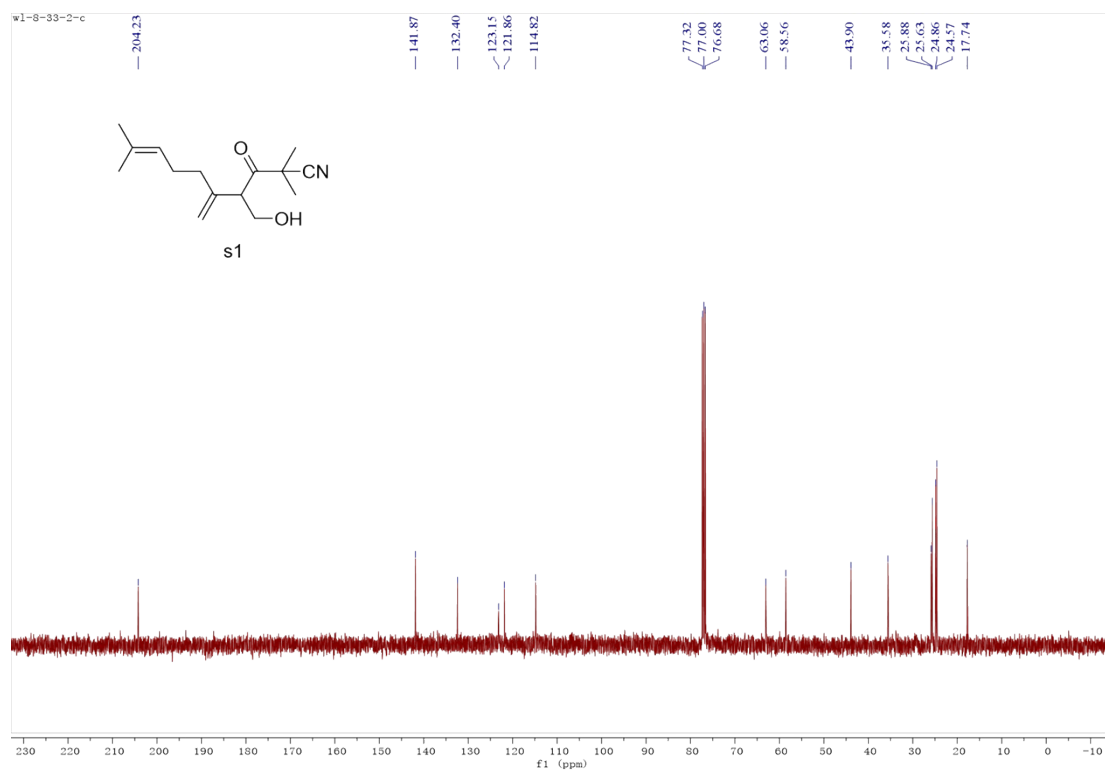

Supplement: c8cc07032f1.pdf [file c8cc07032f1.pdf]
